# Supplementary material for: A two-part model to estimate inpatient, outpatient, prescribing and care home costs associated with atrial fibrillation in Scotland
Source: PubMed Central journal article supplement (PMC7150597; doi:10.1136/bmjopen-2018-028575), 2020-03-18
Supplement: bmjopen-2018-028575.draft_revisions.pdf [file bmjopen-2018-028575.draft_revisions.pdf]

# BMJ Open

BMJ Open is committed to open peer review. As part of this commitment we make the peer review history of every article we publish publicly available.

When an article is published we post the peer reviewers' comments and the authors' responses online. We also post the versions of the paper that were used during peer review. These are the versions that the peer review comments apply to.

The versions of the paper that follow are the versions that were submitted during the peer review process. They are not the versions of record or the final published versions. They should not be cited or distributed as the published version of this manuscript.

BMJ Open is an open access journal and the full, final, typeset and author-corrected version of record of the manuscript is available on our site with no access controls, subscription charges or pay-per-view fees (<http://bmjopen.bmj.com>).

If you have any questions on BMJ Open's open peer review process please email [info.bmjopen@bmj.com](mailto:info.bmjopen@bmj.com)

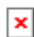

## Inpatient, Outpatient, Prescribing and Care Home Costs associated with Atrial Fibrillation

|                               |                                                                                                                                                                                                                                                                                                                                               |
|-------------------------------|-----------------------------------------------------------------------------------------------------------------------------------------------------------------------------------------------------------------------------------------------------------------------------------------------------------------------------------------------|
| Journal:                      | <i>BMJ Open</i>                                                                                                                                                                                                                                                                                                                               |
| Manuscript ID                 | bmjopen-2018-028575                                                                                                                                                                                                                                                                                                                           |
| Article Type:                 | Research                                                                                                                                                                                                                                                                                                                                      |
| Date Submitted by the Author: | 14-Dec-2018                                                                                                                                                                                                                                                                                                                                   |
| Complete List of Authors:     | Ciminata, Giorgio; University of Glasgow Institute of Health and Wellbeing, Health Economics and Health Technology Assessment (HEHTA)<br>Geue, Claudia; University of Glasgow, Institute of Health and Wellbeing<br>Langhorne, Peter; University of Glasgow, Institute of Cardiovascular and Medical Sciences<br>Wu, O; University of Glasgow |
| Keywords:                     | HEALTH ECONOMICS, Atrial Fibrillation, Stroke < NEUROLOGY, Cost Analysis                                                                                                                                                                                                                                                                      |
|                               |                                                                                                                                                                                                                                                                                                                                               |

SCHOLARONE™  
Manuscripts

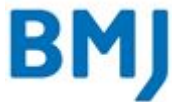

I, the Submitting Author has the right to grant and does grant on behalf of all authors of the Work (as defined in the below author licence), an exclusive licence and/or a non-exclusive licence for contributions from authors who are: i) UK Crown employees; ii) where BMJ has agreed a CC-BY licence shall apply, and/or iii) in accordance with the terms applicable for US Federal Government officers or employees acting as part of their official duties; on a worldwide, perpetual, irrevocable, royalty-free basis to BMJ Publishing Group Ltd ("BMJ") its licensees and where the relevant Journal is co-owned by BMJ to the co-owners of the Journal, to publish the Work in this journal and any other BMJ products and to exploit all rights, as set out in our [licence](#).

The Submitting Author accepts and understands that any supply made under these terms is made by BMJ to the Submitting Author unless you are acting as an employee on behalf of your employer or a postgraduate student of an affiliated institution which is paying any applicable article publishing charge ("APC") for Open Access articles. Where the Submitting Author wishes to make the Work available on an Open Access basis (and intends to pay the relevant APC), the terms of reuse of such Open Access shall be governed by a Creative Commons licence – details of these licences and which [Creative Commons](#) licence will apply to this Work are set out in our licence referred to above.

Other than as permitted in any relevant BMJ Author's Self Archiving Policies, I confirm this Work has not been accepted for publication elsewhere, is not being considered for publication elsewhere and does not duplicate material already published. I confirm all authors consent to publication of this Work and authorise the granting of this licence.

## Inpatient, Outpatient, Prescribing and Care Home Costs associated with Atrial Fibrillation

**Authors:** Ciminata G (Research Assistant)<sup>1</sup>, Geue C (Lecturer in Health Economics)<sup>1</sup>, Langhorne P (Professor of Stroke Care)<sup>2</sup>, Wu O (Professor of Health Technology Assessment)<sup>1</sup>.

1. Health Economics and Health Technology Assessment (HEHTA), Institute of Health & Wellbeing, University of Glasgow, Glasgow G12 8RZ, UK
2. Institute of Cardiovascular & Medical Sciences, University of Glasgow, Glasgow G31 2ER, UK

Corresponding author:

Mr Giorgio Ciminata (MSc), [g.ciminata.1@research.gla.ac.uk](mailto:g.ciminata.1@research.gla.ac.uk)

Cover title: Inpatient, Outpatient, Prescribing and Care Home Costs associated with Atrial Fibrillation

Total number of tables and figures: Figures: 2, Tables: 3

Subject terms: Atrial Fibrillation

Key words: Atrial Fibrillation, Stroke, cost analysis

Word count: 3296

## Abstract

**Objective:** To estimate inpatient, outpatient, prescribing and care-home costs associated with atrial fibrillation (AF), using population-based, individual-level linked data.

**Design:** A two-part model was employed to estimate the probability of resource utilisation and costs conditional on positive utilisation using individual-level linked data.

**Settings:** Scotland, five years following first hospitalisation for AF between 1997 and 2015.

**Participants:** Patients aged  $\geq 50$  years, hospitalised with a known diagnosis of AF or atrial flutter.

**Primary and secondary outcome measures:** Inpatient, outpatient, prescribing and care home costs.

**Results:** The mean annual cost associated with an AF patient was estimated at £3861 (95% CI £3842-£3880). Inpatient admissions and outpatient visits accounted for 77% and 5% of total costs, respectively; prescriptions and care home stay accounted for 4% and 14% of total costs. Inpatient costs was the main driver across all age groups. While inpatient cost contributions (~80%) were constant between 50 and 84 years, they decreased for patients over 85 years. This is offset by increasing care-home cost contributions. Mean annual costs associated with AF increased significantly with increasing number of comorbidities.

**Conclusion:** This study used a contemporary and representative cohort, and a comprehensive approach to estimate costs associated with AF, taking into account resource utilisation beyond hospital care. While overall costs, considerably affected by comorbidity, did not increase with increasing age, care-home costs increased proportionally with age. Inpatient admission was the main contributor to the overall financial burden of AF, highlighting the need for improved mechanisms of early diagnosis to prevent hospitalisations.

## Article summary

### Strengths and limitations of this study

- Costs are estimated through an incidence-based approach using patient-level morbidity records.
- Sufficient follow-up time is used to capture all relevant costs to generate a contemporary estimate of health and care home costs related to AF.
- Scotland offers a robust record linkage system, where administrative patient-level health data are routinely collected.
- Data on primary care consultations were not available for linkage at a national level, however the impact this might have on overall costs is expected to be small.
- The potential risk of AF going undiagnosed and clinical miscoding of morbidity records may lead to an underestimation of the AF cohort and associated costs.
- Other limitations are those inherent to the nature of administrative data, such as miscoding or incomplete records.

## Introduction

Atrial Fibrillation (AF) is the most common form of arrhythmia. In Scotland AF affects 1.8% of the adult population, and rises to 6% among those aged 65 years or over [1]. In an ageing population, AF has a substantial impact on the economic burden of the healthcare system.

A number of cost analyses on estimating the economic burden of AF exist. The majority of these studies are of selective cohorts of AF patients, based on data sourced from administrative database [2-4], health insurance databases [2, 5-7], hospital records [8, 9] and surveys [10]. Direct medical costs related to inpatient admissions, outpatient visits, as well as prescriptions have been included in these estimates; [2-10] indirect costs related to loss of productivity have been estimated among patients who were at working ages [6, 7].

Many of these studies included relatively young patients – those aged 18-20 years or older [2, 4-6, 8-10], or those under the age of 65 years [7]. However, the prevalence of AF increases significantly with age, and is most affected by patients who are older than 50 years; in patients under the age of 50, AF is often associated with structural heart disease, hyperthyroidism, or alcohol excess [11]. Hence, inclusion of younger patients and the exclusion of older patients may result in imprecise cost estimates.

There is a lack of generalisable studies based on large national population datasets that examine the total and the distribution of costs associated with AF [12]. The aim of this study was to quantify the inpatient, outpatient, prescribing and care home costs associated with AF over a five-year period. Using record-linkage of national datasets from Scotland, we also examined the distribution of costs that are attributable to AF.

## Methods

Cost analyses or cost of illness studies typically adopt either the prevalence or incidence based approaches [13]. In the context of AF, the prevalence based approach determines costs attributable to all cases of AF in a given year, while the incidence based approach determines costs of new cases of AF in a given time period. In the present study, costs were estimated with an incidence-based approach.

## Data

Data were obtained from the Information Services Division (ISD) of NHS Scotland as part of a wider project that used routinely collected data to evaluate clinical effectiveness and cost-effectiveness of Direct Oral Anticoagulants (DOACs) in the prevention of stroke in the AF population. Inpatient records for patients with a diagnosis of AF or atrial flutter between 1997 and 2015 were extracted from the General Acute Inpatient and Day Case Scottish Morbidity Records 01 (SMR01). These records contain all general acute admissions, categorized as inpatients or day cases, discharged from non-obstetric and non-psychiatric specialties [14]. Incident AF events (ICD10 code I48) were identified using all six diagnostic positions in SMR01, with a look back period of five years to minimise double counting. After checking for data entry errors and removal of duplicate records, an initial AF cohort consisting of 279,883 individuals hospitalised with a diagnosis of AF or atrial flutter was identified. For the purpose of this analysis, only patients aged 50 years or older were included. Based on clinical advice and the evidence that prevalence and incidence of AF typically increase exponentially from 50 years onwards [11], the analysis including 50 years age group at the lowest range would be inclusive of all patients potentially at risk of AF. The final dataset for analysis consisted of 272,716 patients.



1  
2  
3 Individual-level data linkage was then carried out with outpatient clinic attendance (Outpatient  
4 Attendance Scottish Morbidity Records 00; SMR00), the prescribing information system (PIS),  
5  
6 care home census and mortality records (National Records for Scotland, NRS). Records from  
7  
8 SMR00 include information on new and follow up outpatient appointments for any clinical  
9  
10 specialty [15]. The PIS database includes prescribing records for all medicines and their  
11  
12 associated costs, which are prescribed and dispensed by community pharmacies, dispensing  
13  
14 doctors and a small number of specialist appliance suppliers [16]. The quality of PIS data is  
15  
16 guaranteed by an electronic data capture, and it passes several stages of quality control before  
17  
18 and after data are submitted [17]. The care home census combines the former Residential Care  
19  
20 Home Census (run by the Scottish Government) and the Private Nursing Homes Census (run  
21  
22 by ISD Scotland). Items reported in the care home census include discharge dates to care home  
23  
24 residency such as NHS and private nursing homes, as well as an indication on whether nursing  
25  
26 care is required [16].  
27  
28  
29  
30  
31  
32  
33  
34  
35

36 Patients were followed up for five years following incident AF event in terms of their  
37  
38 healthcare resource use, care home admissions and mortality. Since AF is often a precursor of  
39  
40 stroke and cardiovascular conditions, an estimation of costs for a period of five years post AF  
41  
42 event would allow us to fully capture costs associated with an AF patient.  
43  
44  
45  
46

### 47 **Costing**

48  
49 Inpatient care costs were obtained from the latest (2013/2014) Scottish National Tariff (SNT),  
50  
51 a list of standard average prices based on Healthcare Resource Groups (HRGs) [17, 18]. The  
52  
53 SNT uses HRG4 for grouping clinically similar treatments that use similar levels of healthcare  
54  
55 resources. After defining a total cost per episode, the total cost for a continuous inpatient stay  
56  
57 (CIS) was calculated.  
58  
59  
60

1  
2  
3 A CIS describes the entire duration of an inpatient stay from the date of admission to the date  
4 of discharge and can consist of several episodes in different specialties. Since the SNT is based  
5 on spells of care (inpatient stay within the same specialty) rather than individual inpatient  
6 episodes or a CIS, a CIS was partitioned into spells when a change in specialty occurred [17].  
7  
8 If within a CIS, two or more episodes were in the same specialty, only the highest incurred cost  
9 was taken into account, and the remaining episodes were replaced with a zero cost. Outpatient  
10 costs were obtained by assigning outpatient specialty costs, to outpatient attendances [17]. Unit  
11 costs were specific to whether the outpatient attendance took place at a consultant or nurse led  
12 clinic [15].  
13  
14  
15  
16  
17  
18  
19  
20  
21  
22  
23  
24  
25

26 The cost of each prescription dispensed per patient was obtained from PIS [19]. Firstly, the  
27 price per unit was obtained by dividing the item price by the pack size. Secondly, the total  
28 number of items dispensed was obtained by multiplying the number of items dispensed by the  
29 number of instalments. Care home costs, obtained from the care home census, were based on  
30 length of stay or residency. Care home residency was established from care home census  
31 records, reporting admission to a care home like structure [16]. An average of care home  
32 charges for long stay residents was calculated using information on whether nursing care was  
33 provided or not. The average weekly care home charge was expressed per day, so that only the  
34 effective days spent in a care home were costed.  
35  
36  
37  
38  
39  
40  
41  
42  
43  
44  
45  
46  
47  
48

### 49 **Econometric model**

50  
51 Healthcare expenditure data are typically characterised by: i) a significant proportion of zero-  
52 cost observations for individuals who have not utilised any healthcare resources in a given time  
53 period, and ii) akewed distribution for positive costs. A two-part model was used [20, 21].  
54  
55  
56  
57  
58  
59  
60

1  
2  
3 In the first part of the model, the probability of using a healthcare service in a given time period  
4 was estimated using a probit model (Equation I, please see online supplement). The same  
5 explanatory variables were used in the second part of the model, with a gamma distribution  
6 and log link, estimating costs conditional on having incurred positive costs (Equation II, please  
7 see online supplement). Mean costs per patient per year following their incident AF event were  
8 calculated by multiplying first and second modelling part (Equation III, please see online  
9 supplement).

10  
11  
12 In order to account for the skewed nature of cost data, generalised linear models (GLMs) were  
13 used. These were compared against ordinary least squares regression (OLS) and log  
14 transformed OLS by means of the Akaike Information Criterion (AIC), which measures  
15 goodness of fit. When comparing the different models, GLM reported the lowest AIC  
16 indicating the best fit for the given set of data. A user-written STATA programme  
17 “glmldiagnostic.do” [20], performing four different tests simultaneously, was used to identify  
18 the most appropriate distributional family and link function.

### 19 20 21 **Econometric model covariates**

22 The two-part model adjusted for age, sex, year of inpatient admission, socio-economic status,  
23 urban-rural classification, health board, comorbidities and mortality. These covariates are  
24 considered to be the main confounders that have an effect on costs incurred by an AF  
25 population. We controlled for age because AF and associated comorbidities are age-related  
26 conditions, and may have an impact on the overall costs. We also assumed costs to vary  
27 between males and females, in particular those for care home residency. Variation in healthcare  
28 utilisation and associated costs and care home residency by socio-economic status is controlled  
29 for using the Scottish Index of Multiple Deprivation (SIMD).

1  
2  
3 The SIMD reflects areas of multiple deprivation ranked from the most to the least deprived and  
4 expressed as quintiles where the most and the least deprived areas are represented by 1 and 5  
5 respectively [22]. In Scotland, there are 14 regional health boards responsible for the provision  
6 of healthcare [23]. Hence, potential differences in healthcare utilisation and prescribing costs,  
7 may reflect variation in clinical practice and prescribing behaviour rather than the ability of  
8 patients to access care. Patients living in urban areas may have easier access to care compared  
9 to patients living in more remote areas, which is controlled for including the 8-fold  
10 classification measuring rurality [24].  
11  
12  
13  
14  
15  
16  
17  
18  
19  
20  
21  
22  
23

24 Patients with one or more comorbidities are expected to incur significantly higher costs than  
25 those with none. We accounted for this by including the Charlson comorbidity index, where 1  
26 indicates the absence of comorbidities, 2 the presence of only a single comorbidity and 3 the  
27 presence of more than one comorbidity [25]. Two interaction terms between age and  
28 comorbidities, and mortality and SIMD were included in the econometric model. Intuitively, a  
29 relationship of direct proportionality between age and comorbidities suggests that the level of  
30 comorbidities increases, as patients get older. Similarly, the socio-economic status may  
31 significantly influence the rate of socio-economic inequalities in mortality [26].  
32  
33  
34  
35  
36  
37  
38  
39  
40  
41  
42  
43  
44

#### 45 Ethics statement

46 The authors state that no ethical approval was needed.  
47  
48  
49  
50  
51  
52  
53  
54  
55  
56  
57  
58  
59  
60

## Results

### Cohort characteristics

Of the 272,716 AF patients with a mean age of 71 years (SD 10.6), the majority were identified in the two largest urban health board areas (Greater Glasgow & Clyde and Lothian), accounting for 22.3% and 14.9% respectively. This is also reflected in our categorisation of geographical areas, where large urban represented 38.6% and other urban areas represented 29.8% of the total AF cohort. Greater proportion of patients live in areas belonging to the most deprived quintile compared with those living in the least deprived areas – SIMD quintile 1 and quintile 5 representing 22.6% and 16.4% of the AF cohort respectively (Table 1).

### Econometric modelling results

Regression results for both modelling parts are presented in Table 2. Overall, an inversely U-shaped association between age and the likelihood of utilising any health or social care services was observed – a gradual increment in the likelihood in resource use with advancing age up to 80 years, when compared with the reference group (50-54 years), while patients 80 years or older showing a decreased probability of utilising healthcare services. However, this association was not observed in the second modelling part model, estimating costs conditional on having incurred positive costs, where a statistically significant gradient between age and costs indicated increasing costs as the cohort ages. The use of health or social care services and associated costs also increased significantly for patients living in the most deprived areas, when compared with patients living in areas with the lowest level of deprivation. The effect of socio-economic status on healthcare utilisation was also measured for those who are alive at the end of the five-year follow-up period through an interaction term between SIMD and mortality, but no statistically significant effect was found.

1  
2  
3 Full details of regression results for interaction terms are presented in the supplementary online  
4 material (Table I, please see online supplement).  
5  
6  
7  
8  
9

10 For patients with comorbidities, the probabilities of utilising healthcare services were 49.5%  
11 (one comorbidity) and 78.6% (two or more comorbidities) greater than the probability for those  
12 with no comorbidities. Although healthcare utilisation increased with the number of  
13 comorbidities, the interaction term between age and comorbidities indicated that as patients get  
14 older the use of healthcare services on average is lower for patients with one or more  
15 comorbidities than those with none. The decrease in healthcare utilisation by age is more  
16 pronounced in patients with more comorbidities than in those with only one comorbidity. The  
17 difference in healthcare costs between comorbidity categories indicated that in the presence of  
18 one or more comorbidities, on average healthcare costs decrease as patients get older.  
19  
20  
21  
22  
23  
24  
25  
26  
27  
28  
29  
30  
31  
32

### 33 **Cost estimates**

34  
35 The estimated mean annual cost per AF patient was £3861 (95% CI: £3842-£3880). The  
36 estimated total costs and distribution of costs according to sex are shown in Table 3. While  
37 there is little difference between the total costs and the distribution of costs for inpatient,  
38 outpatient and prescription costs, the difference seems more pronounced when comparing the  
39 care home component of costs (5% of total costs among males vs 7% of total costs among  
40 females). The average annual cost per AF patient by age and for each health or care home  
41 sector is shown in Figure 1.  
42  
43  
44  
45  
46  
47  
48  
49  
50  
51  
52  
53  
54  
55  
56  
57  
58  
59  
60

1  
2  
3 Considering the individual contribution of each cost component to the overall costs, inpatient  
4 costs was the main driver across all age groups. While inpatient cost contribution remained  
5 constant with an average contribution of about 80% to the overall cost for patients aged  
6 between 50 and 84 years, it decreased for patients over 85 years of age. Similar patterns was  
7 observed for outpatient and prescribing costs. On the contrary, the contribution of care home  
8 costs to the overall costs increased with age (0.5% for patients aged 50-54 years and  
9 approximately 11% for patients who are 90 years or older). The contribution of each setting to  
10 the total health and care home costs by the number of existing comorbidities is illustrated in  
11 Figure 2. While inpatient and total costs vary considerably with the number of comorbidities,  
12 outpatient and care home contributions remain fairly constant.

## 28 Discussion

30 A greater proportion of AF patients were found in areas with the highest index of deprivation.  
31 This, combined with the likelihood for people living in the most deprived quintile having longer  
32 inpatient stays due to a lack of support at home, may explain the difference in inpatient care  
33 utilisation between patients from the most and the least deprived areas, with associated costs  
34 being higher for the former group. As AF is more likely to affect the elderly, AF related costs  
35 were expected to increase with age. As health deteriorates with age, older age groups are  
36 assumed to make greater use of healthcare services, and therefore incur higher costs than  
37 younger age groups. However, age was found to have a modest impact on overall healthcare  
38 costs, being fairly consistent across age groups. This finding is in line with existing evidence  
39 indicating that healthcare expenditure depends not only on patients' calendar age, but is also  
40 significantly associated with remaining lifetime [27].  
41  
42  
43  
44  
45  
46  
47  
48  
49  
50  
51  
52  
53  
54  
55  
56  
57  
58  
59  
60

1  
2  
3 Any observed correlation between healthcare expenditure and age may therefore be attributable  
4 to the fact that the proportion of patients who are at the end of their lives is substantially greater  
5 in older rather than younger age groups [27]. On the other hand, comorbidity had a considerable  
6 effect on the overall cost, increasing significantly in patients with more than one comorbidity.  
7  
8 However, the decrease in healthcare utilisation by age is more pronounced in patients with  
9 more comorbidities than in those with only one comorbidity. Decreasing inpatient and  
10 outpatient costs for the oldest patients were offset by increasing care home costs, in particular  
11 for women. Indeed, the main cause for higher overall costs incurred by women is attributable  
12 to the higher likelihood for elderly women to reside in care homes. Interestingly, care home  
13 contribution to the overall costs was noticeably lower for patients with multiple comorbidities  
14 than for those with none or one comorbidity. This may suggest that sicker patients are more  
15 likely to be in hospital than in a care home.  
16  
17  
18  
19  
20  
21  
22  
23  
24  
25  
26  
27  
28  
29  
30  
31  
32

33 To date, only one single study published in 2004 has estimated the cost of AF in Scotland; the  
34 authors estimated the cost of AF in 1995/1996, and projected these to the year 2000 [28].  
35 Previous work has focussed on a 12-months follow-up, which seems limited in order to capture  
36 all healthcare resource utilisation for AF patients. Our study offers a longer follow-up and a  
37 contemporary estimate of healthcare costs related to AF including all relevant care settings.  
38 Our study offers a distinct advantage over previous work as costs, rather than being based on  
39 extrapolated rates using a prevalence-based approach [28], are estimated with an incidence-  
40 based method using patient-level morbidity records. Using an incidence based approach to  
41 costing and a broad perspective to capture the majority of costs associated with AF, several  
42 routinely collected administrative datasets from Scotland were combined, including care home  
43 utilisation.  
44  
45  
46  
47  
48  
49  
50  
51  
52  
53  
54  
55  
56  
57  
58  
59  
60



Existing studies, including ours, regardless of econometric model choice and covariates used, show that costs due to inpatient admission are the main contributor to overall AF related healthcare cost. This is a pertinent finding and highlights strategies to improve diagnosis of AF. In Scotland, 1 in 3 patients with AF are currently undiagnosed and hence do not receive treatment that could prevent their AF to progress and potentially require inpatient admission [29]. The European AF management guidelines and the Scottish Cross-Party Group 'Heart Disease and Stroke', recently recommended that people who are 65 years or older and at risk of AF and associated comorbidities such as cardiovascular disease, diabetes or respiratory disease should be screened opportunistically in primary care, pharmacies or community settings [29, 30]. With rigorous screening and appropriate treatment, hospitalisations could be avoided and costs reduced.

Although we have captured most healthcare sectors and related costs, we were not able to obtain national data on primary care consultations, as these data are currently not routinely available for linkage in Scotland. However, the costs associated with primary care consultations is expected to have a limited impact on the overall total AF related costs. Further, there is potential risk of AF going undiagnosed and clinical miscoding of morbidity records, leading to an underestimation of the AF cohort and associated costs. Nevertheless, by using a cohort of patients hospitalised with AF we were able to capture more severe cases of AF. Prescribing and care home data were only available respectively from 2009 to 2012, their contribution to overall AF related costs might also be underestimated. Other limitations are inherent to the nature of administrative data, such as missing records or incomplete data. Recognising these limitations, we were nevertheless able to harness high quality patient-level linked data to identify a cohort of AF patients and to estimate AF related costs in Scotland.

1  
2  
3 The inclusion of all available cost components is crucial for establishing overall costs, as these  
4 often extend beyond hospitalisation. The study identifies hospitalisation as the main cost driver  
5 and suggests that the implementation of AF screening policies could substantially reduce AF  
6 related health care costs. Most importantly, the study concludes that patient's age has a limited  
7 impact on the overall AF related cost, and therefore may contribute much less to future growth  
8 of AF related cost in an ever-ageing Scottish population . Future work will be able to utilise  
9 Scottish Stroke Care Audit (SSCA) records, allowing for the identification of additional AF  
10 patients; these are patients hospitalised with a stroke, where AF has been recorded in audit data  
11 as an underlying comorbidity. Being able to complement inpatient records with SSCA records  
12 will allow us to capture more AF patients in Scotland. Moreover, future research may be able  
13 to include indirect costs associated with productivity-loss by linking morbidity and prescribing  
14 data to national data from the Department for Work and Pensions, for instance.  
15  
16  
17  
18  
19  
20  
21  
22  
23  
24  
25  
26  
27  
28  
29  
30  
31  
32  
33  
34  
35  
36  
37  
38  
39  
40  
41  
42  
43  
44  
45  
46  
47  
48  
49  
50  
51  
52  
53  
54  
55  
56  
57  
58  
59  
60

1  
2  
3 **Acknowledgements:** We thank the members of the Information Services Division, National  
4 Services Scotland, for their support. We acknowledge the support from The Farr Institute @  
5 Scotland. The Farr Institute @ Scotland is supported by a 10-funder consortium: Arthritis  
6 Research UK, the British Heart Foundation, Cancer Research UK, the Economic and Social  
7 Research Council, the Engineering and Physical Sciences Research Council, the Medical  
8 Research Council, the National Institute of Health Research, the National Institute for Social  
9 Care and Health Research (Welsh Assembly Government), the Chief Scientist Office (Scottish  
10 Government Health Directorates), the Wellcome Trust (MRC Grant No: MR/K007017/1).  
11  
12  
13  
14  
15  
16  
17  
18  
19  
20  
21

22 **Author contributions:** All authors conceived the article. GC carried out the statistical  
23 analysis and prepared the first draft of the manuscript. All authors contributed to editing the  
24 manuscript and approved the final version submitted for publication.  
25  
26  
27  
28

29 **Funding sources:** This work was supported by Farr Institute for Health Informatics Research,  
30 Scotland, MRC, grant number MR/K007017/1  
31  
32  
33

34 **Competing interest:** The authors declare no conflict of interest.  
35

36 **Data Statement:** All data underlying the analyses are confidential and subject to disclosure  
37 control. Data can only be obtained through application to ISD via the Public Benefit and  
38 Privacy Panel (PBPP).  
39  
40  
41  
42  
43  
44  
45  
46  
47  
48  
49  
50  
51  
52  
53  
54  
55  
56  
57  
58  
59  
60

## References

1. Scotland, H.I. *Prevention of stroke in patients with atrial fibrillation*. 2013 [cited 2016 January 2016]; Available from: [http://www.sign.ac.uk/assets/af\\_publication.pdf](http://www.sign.ac.uk/assets/af_publication.pdf).
2. Bennell, M.C., et al., *Identifying predictors of cumulative healthcare costs in incident atrial fibrillation: a population-based study*. J Am Heart Assoc, 2015. **4**(4).
3. Hallinen, T., et al., *Direct costs of warfarin treatment among patients with atrial fibrillation in a Finnish health care setting*. Curr Med Res Opin, 2006. **22**(4): p. 683-92.
4. Nelson, W.W., et al., *Out-of-range international normalized ratio values and healthcare cost among new warfarin patients with non-valvular atrial fibrillation*. J Med Econ, 2015. **18**(5): p. 333-40.
5. Ghate, S.R., et al., *All-cause and bleeding-related health care costs in warfarin-treated patients with atrial fibrillation*. J Manag Care Pharm, 2011. **17**(9): p. 672-84.
6. Rohrbacker, N.J., et al., *The burden of atrial fibrillation and other cardiac arrhythmias in an employed population: associated costs, absences, and objective productivity loss*. J Occup Environ Med, 2010. **52**(4): p. 383-91.
7. Wu, E.Q., et al., *Economic burden and co-morbidities of atrial fibrillation in a privately insured population*. Curr Med Res Opin, 2005. **21**(10): p. 1693-9.
8. Holstenson, E., et al., *Predictors of costs related to cardiovascular disease among patients with atrial fibrillation in five European countries*. Europace, 2011. **13**(1): p. 23-30.
9. Reynolds, M.R., et al., *Healthcare resource utilization and costs associated with recurrent episodes of atrial fibrillation: the FRACTAL registry*. J Cardiovasc Electrophysiol, 2007. **18**(6): p. 628-33.
10. Jonsson, L., et al., *Cost of illness and drivers of cost in atrial fibrillation in Sweden and Germany*. Appl Health Econ Health Policy, 2010. **8**(5): p. 317-25.
11. Sankaranarayanan, R., et al., *Comparison of Atrial Fibrillation in the Young versus That in the Elderly: A Review*. Cardiology Research and Practice, 2013. **2013**: p. 16.
12. Johnsen, S.P., et al., *Cost of illness of atrial fibrillation: a nationwide study of societal impact*. BMC Health Services Research, 2017. **17**(1): p. 714.
13. Tarricone, R., *Cost-of-illness analysis. What room in health economics?* Health Policy, 2006. **77**(1): p. 51-63.
14. Scotland, I.S.D. *General Acute Inpatient and Day Case - Scottish Morbidity Record (SMR01)*. 2015 [cited 2017; Available from: <http://www.ndc.scot.nhs.uk/National-Datasets/data.asp?SubID=2>].
15. Scotland, I.S.D. *Outpatient Attendance (SMR00)*. 2015 [cited 2015 January 2015]; Available from: <http://www.ndc.scot.nhs.uk/National-Datasets/data.asp?SubID=2>.
16. Scotland, I.S.D. *Care Home Census 2015*. 2015 November 2015]; Available from: <http://www.isdscotland.org/Health-Topics/Health-and-Social-Community-Care/Care-Homes/Previous-Publications/>.
17. Scotland, I.S.D. *Scottish National Tariff*. 2015 [cited 2015 December 2015]; Available from: <http://www.isdscotland.org/Health-Topics/Finance/Scottish-National-Tariff/>.
18. Groups, H.R. *Healthcare Resource Groups*. 2015 November 2015]; Available from: <http://www.hscic.gov.uk/hrg>.
19. Alvarez-Madrado, S., et al., *Data Resource Profile: The Scottish National Prescribing Information System (PIS)*. International Journal of Epidemiology, 2016.
20. Henry, A.G., et al., *Economic Evaluation in Clinical Trials*. 'Oxford University Press': Oxford, UK.
21. Manning, W.G., A. Basu, and J. Mullahy, *Generalized modeling approaches to risk adjustment of skewed outcomes data*. Journal of Health Economics, 2005. **24**(3): p. 465-488.

- 1
  - 2
  - 3
  - 4
  - 5
  - 6
  - 7
  - 8
  - 9
  - 10
  - 11
  - 12
  - 13
  - 14
  - 15
  - 16
  - 17
  - 18
  - 19
  - 20
  - 21
  - 22
  - 23
  - 24
  - 25
  - 26
  - 27
  - 28
  - 29
  - 30
  - 31
  - 32
  - 33
  - 34
  - 35
  - 36
  - 37
  - 38
  - 39
  - 40
  - 41
  - 42
  - 43
  - 44
  - 45
  - 46
  - 47
  - 48
  - 49
  - 50
  - 51
  - 52
  - 53
  - 54
  - 55
  - 56
  - 57
  - 58
  - 59
  - 60
22. Government, T.S. *Scottish Index of Multiple Deprivation*. 2015 [cited 2015 November 2015]; Available from: <http://www.gov.scot/Topics/Statistics/SIMD>.
23. Government, T.S. *NHS Boards*. 2015 [cited 2015 January 2015]; Available from: <http://www.gov.scot/Topics/Health/NHS-Workforce/NHS-Boards>.
24. Government, T.S. *Scottish Government Urban Rural Classification*. 2015 [cited 2015 January 2015]; Available from: <http://www.gov.scot/Topics/Statistics/About/Methodology/UrbanRuralClassification>.
25. Charlson, M.E., et al., *A new method of classifying prognostic comorbidity in longitudinal studies: Development and validation*. *Journal of Chronic Diseases*, 1987. **40**(5): p. 373-383.
26. Leyland, A.H., et al., *Cause-specific inequalities in mortality in Scotland: two decades of change. A population-based study*. *BMC Public Health*, 2007. **7**: p. 172.
27. Zweifel, P., S. Felder, and M. Meiers, *Ageing of population and health care expenditure: a red herring?* *Health Econ*, 1999. **8**(6): p. 485-96.
28. Stewart, S., et al., *Cost of an emerging epidemic: an economic analysis of atrial fibrillation in the UK*. *Heart*, 2004. **90**(3): p. 286-292.
29. Stroke, C.-P.G.o.H.D.a. *A Focus on Atrial Fibrillation in Scotland 2017*. 2017 March 2018]; Available from: <https://www.chss.org.uk/documents/2018/01/a-focus-on-atrial-fibrillation-in-scotland-pdf.pdf>.
30. Camm, A.J., et al., *2012 focused update of the ESC Guidelines for the management of atrial fibrillation: an update of the 2010 ESC Guidelines for the management of atrial fibrillation. Developed with the special contribution of the European Heart Rhythm Association*. *Eur Heart J*, 2012. **33**(21): p. 2719-47.

## Figure legends

**Figure 1.** Average annual costs per patient hospitalised with AF by sector. Cost components with confidence interval are presented for each age group.

**Figure 2.** Average cost per patient hospitalised with AF by Charlson Comorbidity Index. Cost components with confidence interval are presented for each Comorbidity category.

## Tables

**Table 1. Baseline characteristics of AF patients 50 years or older**

| Characteristics                           | N (%)                  |
|-------------------------------------------|------------------------|
| Number of patients                        | 272,716                |
| Mean age at first admission*(SD)**(range) | 71 *(10.6) **(50 -108) |
| Sex                                       |                        |
| Male                                      | 135,683 (49.8)         |
| Female                                    | 137,033 (50.2)         |
| Health Boards                             |                        |
| Greater Glasgow & Clyde                   | 60,774 (22.3)          |
| Lothian                                   | 40,498 (14.9)          |
| Lanarkshire                               | 30,105 (11.0)          |
| Grampian                                  | 25,208 (9.2)           |
| Ayrshire & Arran                          | 24,468 (7.9)           |
| Tayside                                   | 21,543 (9.0)           |
| Fife                                      | 18,584 (6.8)           |
| Highland                                  | 17,612 (6.5)           |
| Forth valley                              | 13,308 (4.9)           |
| Dumfries & Galloway                       | 9,645 (3.5)            |
| Borders                                   | 7,148 (2.6)            |
| Western isles                             | 1,812 (0.7)            |
| Shetland                                  | 1,009 (0.4)            |
| Orkney                                    | 1,002 (0.4)            |
| Geography                                 |                        |
| Large/urban                               | 104,841 (38.4)         |
| Other/urban                               | 80,794 (29.6)          |
| Accessible small towns                    | 24,492 (9.0)           |
| Remote small towns                        | 8,126 (3.0)            |
| Very remote small towns                   | 3,712 (1.4)            |
| Accessible rural                          | 30,122 (11.1)          |
| Remote rural                              | 10,277 (3.8)           |
| Very remote rural                         | 9,908 (3.6)            |
| SIMD quintile                             |                        |
| 1                                         | 61,686 (22.6)          |
| 2                                         | 61,704 (22.6)          |
| 3                                         | 54,937 (20.1)          |
| 4                                         | 49,448 (18.1)          |
| 5                                         | 44,933 (16.4)          |
| Comorbidity                               |                        |
| no comorbidity                            | 36,345 (13.4)          |
| 1 comorbidity                             | 52,159 (19.2)          |
| >1 comorbidities                          | 182,827 (67.4)         |

**Table 2. Regression results: probability of healthcare resources utilisation and cost estimation**

| Covariates               | Probability<br>(1 <sup>st</sup> modelling part) |          | Cost Ratios<br>(2 <sup>nd</sup> modelling part) |          |
|--------------------------|-------------------------------------------------|----------|-------------------------------------------------|----------|
|                          | Coefficient (95% CI)                            | Std. Err | Coefficient (95% CI)                            | Std. Err |
| <b>Age group (years)</b> |                                                 |          |                                                 |          |
| 50-54                    | Reference                                       |          |                                                 |          |
| 55-59                    | 0.036 (-0.034, 0.107)                           | 0.036    | 0.045 (-0.005, 0.096)                           | 0.026    |
| 60-64                    | 0.113 (0.045, 0.180)                            | 0.034    | 0.088 (0.040, 0.136)                            | 0.025    |
| 65-69                    | 0.134 (0.069, 0.199)                            | 0.033    | 0.120 (0.073, 0.167)                            | 0.024    |
| 70-74                    | 0.126 (0.062, 0.191)                            | 0.033    | 0.176 (0.130, 0.221)                            | 0.023    |
| 75-79                    | 0.182 (0.118, 0.247)                            | 0.033    | 0.183 (0.138, 0.228)                            | 0.023    |
| 80-84                    | 0.075 (0.009, 0.141)                            | 0.034    | 0.246 (0.200, 0.292)                            | 0.023    |
| 85-89                    | 0.022 (-0.048, 0.091)                           | 0.035    | 0.334 (0.286, 0.382)                            | 0.024    |
| 90-max                   | -0.208 (-0.283, -0.132)                         | 0.039    | 0.474 (0.420, 0.527)                            | 0.027    |
| <b>Sex</b>               |                                                 |          |                                                 |          |
| Male                     | Reference                                       |          |                                                 |          |
| Female                   | 0.029 (0.012, 0.047)                            | 0.009    | 0.052 (0.042, 0.062)                            | 0.005    |
| Date of admission        | 0.173 (0.172, 0.175)                            | 0.001    | -0.023 (-0.024, -0.022)                         | 0.001    |
| <b>SIMD quintile</b>     |                                                 |          |                                                 |          |
| 1                        | Reference                                       |          |                                                 |          |
| 2                        | 0.036 (-0.012, 0.083)                           | 0.024    | -0.054 (-0.079, -0.028)                         | 0.013    |
| 3                        | -0.028 (-0.075, 0.019)                          | 0.024    | -0.075 (-0.102, -0.049)                         | 0.014    |
| 4                        | -0.031 (-0.078, 0.017)                          | 0.024    | -0.106 (-0.132, -0.080)                         | 0.013    |
| 5                        | -0.042 (-0.090, 0.006)                          | 0.024    | -0.139 (-0.165, -0.113)                         | 0.013    |
| <b>Geography</b>         |                                                 |          |                                                 |          |
| Large urban              | Reference                                       |          |                                                 |          |
| Other urban              | -0.144 (-0.171, -0.118)                         | 0.013    | -0.024 (-0.039, -0.010)                         | 0.007    |
| Accessible small towns   | -0.163 (-0.197, -0.128)                         | 0.018    | -0.040 (-0.059, -0.021)                         | 0.010    |
| Accessible rural         | -0.213 (-0.247, -0.180)                         | 0.017    | -0.044 (-0.063, -0.025)                         | 0.010    |
| Remote small towns       | -0.160 (-0.213, -0.106)                         | 0.027    | 0.002 (-0.030, 0.034)                           | 0.016    |
| Remote rural             | -0.298 (-0.347, -0.250)                         | 0.025    | -0.038 (-0.067, -0.009)                         | 0.015    |
| Very remote small towns  | -0.398 (-0.480, -0.315)                         | 0.042    | -0.053 (-0.105, -0.002)                         | 0.026    |
| Very remote rural        | -0.371 (-0.434, -0.308)                         | 0.032    | -0.059 (-0.100, -0.018)                         | 0.021    |
| <b>Health boards</b>     |                                                 |          |                                                 |          |
| Great Glasgow and Clyde  | Reference                                       |          |                                                 |          |
| Lothian                  | -0.041 (-0.073, -0.010)                         | 0.016    | -0.032 (-0.049, -0.016)                         | 0.008    |
| Lanarkshire              | 0.003 (-0.031, 0.038)                           | 0.018    | -0.065 (-0.084, -0.047)                         | 0.009    |
| Ayrshire and Arran       | -0.356 (-0.393, -0.318)                         | 0.019    | -0.044 (-0.066, -0.022)                         | 0.011    |
| Grampian                 | 0.020 (-0.018, 0.058)                           | 0.019    | -0.059 (-0.079, -0.039)                         | 0.010    |
| Tayside                  | -0.401 (-0.436, -0.365)                         | 0.018    | -0.084 (-0.104, -0.063)                         | 0.010    |
| Fife                     | -0.055 (-0.099, -0.012)                         | 0.022    | -0.007 (-0.031, 0.018)                          | 0.012    |
| Highland                 | -0.156 (-0.209, -0.104)                         | 0.027    | -0.047 (-0.078, -0.016)                         | 0.016    |
| Forth Valley             | -0.473 (-0.516, -0.431)                         | 0.022    | -0.113 (-0.139, -0.087)                         | 0.013    |



|                          |                         |       |                         |       |
|--------------------------|-------------------------|-------|-------------------------|-------|
| Dumfries and Galloway    | -0.303 (-0.353, -0.252) | 0.026 | -0.137 (-0.167, -0.106) | 0.015 |
| Borders                  | -0.487 (-0.541, -0.434) | 0.027 | -0.090 (-0.124, -0.056) | 0.017 |
| Western Isles            | -1.075 (-1.176, -0.974) | 0.052 | 0.473 (0.396, 0.550)    | 0.039 |
| Orkney                   | -0.374 (-0.507, -0.240) | 0.068 | -0.030 (-0.119, 0.059)  | 0.045 |
| Shetland                 | -0.490 (-0.622, -0.359) | 0.067 | -0.094 (-0.192, 0.003)  | 0.050 |
| Mortality within 5 years |                         |       |                         |       |
| Alive                    | Reference               |       |                         |       |
| Dead                     | 0.444 (0.400, 0.488)    | 0.023 | 0.662 (0.639 - 0.684)   | 0.011 |
| Comorbidity              |                         |       |                         |       |
| no comorbidities         | Reference               |       |                         |       |
| 1 comorbidity            | 0.495 (0.382, 0.607)    | 0.057 | 0.358 (0.277, 0.438)    | 0.041 |
| >1 comorbidities         | 0.786 (0.631, 0.942)    | 0.079 | 0.774 (0.702, 0.845)    | 0.037 |

**Table 3. Average annual costs per patient hospitalised with AF by sex**

| Sex        | Cost estimates      |              |
|------------|---------------------|--------------|
|            | Mean total cost (%) | 95% CI       |
| Male       |                     |              |
| Inpatient  | 3004 (80.06)        | (2983, 3025) |
| Outpatient | 314 (8.38)          | (312, 317)   |
| Care home  | 172 (4.58)          | (160, 184)   |
| PIS        | 247 (6.59)          | (245, 250)   |
| Total      | 3752                | (3726, 3779) |
| Female     |                     |              |
| Inpatient  | 3079 (77.60)        | (3058, 3100) |
| Outpatient | 311 (7.83)          | (308, 313)   |
| Care home  | 279 (7.03)          | (265, 292)   |
| PIS        | 263 (6.63)          | (261, 266)   |
| Total      | 3968                | (3940, 3996) |

1  
2  
3  
4  
5  
6  
7  
8  
9  
10  
11  
12  
13  
14  
15  
16  
17  
18  
19  
20  
21  
22  
23  
24  
25  
26  
27  
28  
29  
30  
31  
32  
33  
34  
35  
36  
37  
38  
39  
40  
41  
42  
43  
44  
45  
46  
47  
48  
49  
50  
51  
52  
53  
54  
55  
56  
57  
58  
59  
60

For peer review only

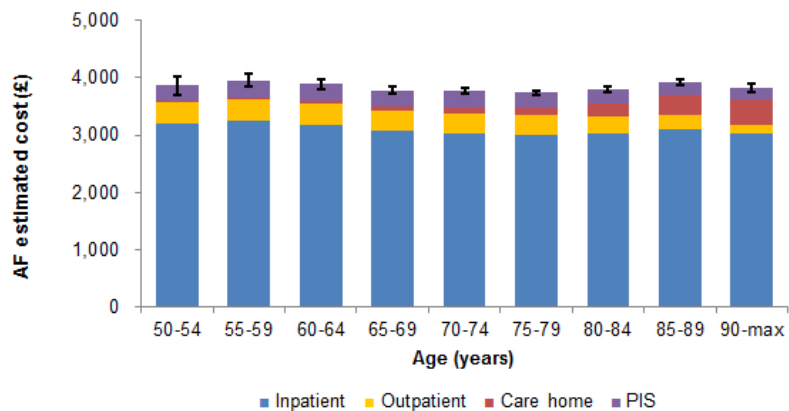

| Age group | Inpatient total cost (£)<br>Mean (95% CI) | Outpatient total cost (£)<br>Mean (95% CI) | Care home total cost (£)<br>Mean (95% CI) | PIS total cost (£)<br>Mean (95% CI) |
|-----------|-------------------------------------------|--------------------------------------------|-------------------------------------------|-------------------------------------|
| (50-54)   | 3198 (3065, 3331)                         | 371 (358, 385)                             | 20 (9, 48)                                | 275 (257, 293)                      |
| (55-59)   | 3263 (3167, 3360)                         | 373 (364, 382)                             | 23 (2, 44)                                | 295 (282, 307)                      |
| (60-64)   | 3173 (3108, 3237)                         | 367 (360, 374)                             | 49 (29, 69)                               | 297 (288, 306)                      |
| (65-69)   | 3071 (3021, 3121)                         | 365 (360, 370)                             | 55 (38, 71)                               | 289 (283, 295)                      |
| (70-74)   | 3028 (2989, 3067)                         | 357 (353, 361)                             | 98 (81, 115)                              | 285 (281, 290)                      |
| (75-79)   | 3013 (2981, 3044)                         | 341 (337, 345)                             | 122 (107, 137)                            | 270 (266, 273)                      |
| (80-84)   | 3019 (2986, 3051)                         | 300 (297, 304)                             | 232 (214, 250)                            | 249 (246, 252)                      |
| (85-89)   | 3094 (3057, 3131)                         | 250 (246, 254)                             | 352 (328, 375)                            | 226 (223, 229)                      |
| (90-max)  | 3023 (2977, 3069)                         | 161 (157, 165)                             | 449 (417, 480)                            | 192 (188, 196)                      |
| Total     | 3042 (3027, 3057)                         | 313 (311, 314)                             | 235 (226, 244)                            | 255 (253, 257)                      |

185x159mm (96 x 96 DPI)

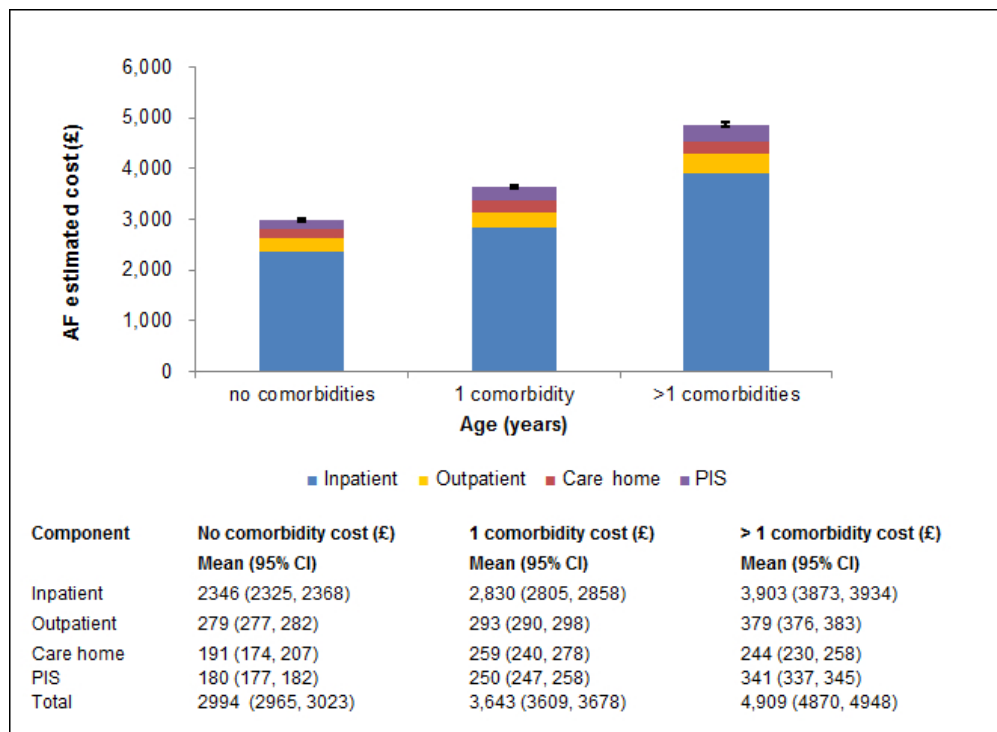

175x128mm (96 x 96 DPI)

## ONLINE SUPPLEMENT

**Table I. Regression interactions: probability of healthcare resources utilisation and cost estimation**

| Covariates                                                  | Probability<br>(1 <sup>st</sup> modelling part) |          | Cost Ratios<br>(2 <sup>nd</sup> modelling part) |          |
|-------------------------------------------------------------|-------------------------------------------------|----------|-------------------------------------------------|----------|
|                                                             | Coefficient (95% CI)                            | Std. Err | Coefficient (95% CI)                            | Std. Err |
| Interaction: SIMD - Mortality within 5 years                |                                                 |          |                                                 |          |
| 1                                                           | Reference                                       |          |                                                 |          |
| 2                                                           | -0.023 (-0.079, 0.034)                          | 0.029    | 0.056 (0.026, 0.086)                            | 0.015    |
| 3                                                           | 0.037 (-0.019, 0.093)                           | 0.029    | 0.064 (0.032, 0.095)                            | 0.016    |
| 4                                                           | 0.005 (-0.051, 0.062)                           | 0.029    | 0.081 (0.049, 0.112)                            | 0.016    |
| 5                                                           | 0.041 (-0.018, 0.099)                           | 0.030    | 0.092 (0.060, 0.124)                            | 0.016    |
| Interaction: age (year) - Charlson score (1 comorbidity)    |                                                 |          |                                                 |          |
| 50-54                                                       | Reference                                       |          |                                                 |          |
| 55-59                                                       | -0.212 (-0.348, -0.076)                         | 0.069    | -0.065 (-0.159, 0.030)                          | 0.048    |
| 60-64                                                       | -0.289 (-0.419, -0.158)                         | 0.067    | -0.100 (-0.191, -0.010)                         | 0.046    |
| 65-69                                                       | -0.329 (-0.454, -0.204)                         | 0.064    | -0.145 (-0.233, -0.057)                         | 0.045    |
| 70-74                                                       | -0.338 (-0.461, -0.215)                         | 0.063    | -0.186 (-0.272, -0.100)                         | 0.044    |
| 75-79                                                       | -0.399 (-0.520, -0.277)                         | 0.062    | -0.180 (-0.265, -0.096)                         | 0.043    |
| 80-84                                                       | -0.421 (-0.543, -0.300)                         | 0.062    | -0.193 (-0.278, -0.107)                         | 0.044    |
| 85-89                                                       | -0.471 (-0.596, -0.347)                         | 0.064    | -0.199 (-0.287, -0.111)                         | 0.045    |
| 90-max                                                      | -0.536 (-0.667, -0.406)                         | 0.066    | -0.251 (-0.345, -0.158)                         | 0.048    |
| Interaction: age (year) - Charlson score (>1 comorbidities) |                                                 |          |                                                 |          |
| 50-54                                                       | Reference                                       |          |                                                 |          |
| 55-59                                                       | -0.121 (-0.304, 0.062)                          | 0.093    | 0.005 (-0.083, 0.093)                           | 0.045    |
| 60-64                                                       | -0.117 (-0.290, 0.057)                          | 0.088    | -0.109 (-0.191, -0.027)                         | 0.042    |
| 65-69                                                       | -0.156 (-0.323, 0.011)                          | 0.085    | -0.222 (-0.301, -0.143)                         | 0.040    |
| 70-74                                                       | -0.234 (-0.398, 0.070)                          | 0.084    | -0.306 (-0.382, -0.229)                         | 0.039    |
| 75-79                                                       | -0.350 (-0.513, 0.188)                          | 0.083    | -0.342 (-0.417, -0.266)                         | 0.039    |
| 80-84                                                       | -0.440 (-0.603, 0.278)                          | 0.083    | -0.410 (-0.487, -0.334)                         | 0.039    |
| 85-89                                                       | -0.550 (-0.715, -0.386)                         | 0.084    | -0.447 (-0.525, -0.369)                         | 0.040    |
| 90-max                                                      | -0.657 (-0.826, -0.488)                         | 0.086    | -0.590 (-0.674, -0.506)                         | 0.043    |

### Equation I. Probability of Healthcare Utilisation

$$\Pr(HCE_{it} > 0) = \alpha + \beta_1 A_{it} + \beta_2 G_i + \beta_3 Y_i + \sum_{s=2}^5 \beta_4 S_i + \sum_{u=2}^8 \beta_5 U_i + \sum_{h=2}^{14} \beta_6 H_i + \sum_{c=2}^3 \beta_7 C_{it} + \beta_8 D_i + \left( \beta_9 SD \sum_{s=2}^5 SD_i * D_i \right) + \left( \beta_{10} CA \sum_{c=2}^3 C_{it} * A_{it} \right) + u_i$$

Where: A is age at the time of admission (reference category: 50 -54 years); G is sex (reference category: male); Y is year of admission; S is SIMD quintile (reference category: most deprived quintile (1)); U is the urban/rural classification (reference category: large urban area); H is health board of inpatient admission (reference category: Greater Glasgow & Clyde); C is the Charlson comorbidity index (reference category: no comorbidities); D is mortality during five-year follow-up, SD is the interaction between SIMD and mortality; CA is the interaction between comorbidity and age;  $u_i$  is the error term for patient  $i$  at time  $t$ .

### Equation II. Cost Estimation

$$E[HCE] = g(x\beta)$$

Where  $x\beta$  is the linear predictor for HCE

### Equation III. Multiplying First and Second Part

$$E[HCE|X] = \Pr(HCE > 0|X) * E[HCE|HCE > 0, X]$$

**STROBE 2007 (v4) Statement—Checklist of items that should be included in reports of *cohort studies***

| Section/Topic                | Item # | Recommendation                                                                                                                                                                       | Reported on page # |
|------------------------------|--------|--------------------------------------------------------------------------------------------------------------------------------------------------------------------------------------|--------------------|
| <b>Title and abstract</b>    | 1      | (a) Indicate the study's design with a commonly used term in the title or the abstract                                                                                               | 1                  |
|                              |        | (b) Provide in the abstract an informative and balanced summary of what was done and what was found                                                                                  | 1                  |
| <b>Introduction</b>          |        |                                                                                                                                                                                      |                    |
| Background/rationale         | 2      | Explain the scientific background and rationale for the investigation being reported                                                                                                 | 3                  |
| Objectives                   | 3      | State specific objectives, including any prespecified hypotheses                                                                                                                     | 3                  |
| <b>Methods</b>               |        |                                                                                                                                                                                      |                    |
| Study design                 | 4      | Present key elements of study design early in the paper                                                                                                                              | 4                  |
| Setting                      | 5      | Describe the setting, locations, and relevant dates, including periods of recruitment, exposure, follow-up, and data collection                                                      | 4                  |
| Participants                 | 6      | (a) Give the eligibility criteria, and the sources and methods of selection of participants. Describe methods of follow-up                                                           | 4                  |
|                              |        | (b) For matched studies, give matching criteria and number of exposed and unexposed                                                                                                  | n/a                |
| Variables                    | 7      | Clearly define all outcomes, exposures, predictors, potential confounders, and effect modifiers. Give diagnostic criteria, if applicable                                             | 7-8                |
| Data sources/<br>measurement | 8*     | For each variable of interest, give sources of data and details of methods of assessment (measurement). Describe comparability of assessment methods if there is more than one group | n/a                |
| Bias                         | 9      | Describe any efforts to address potential sources of bias                                                                                                                            | 7                  |
| Study size                   | 10     | Explain how the study size was arrived at                                                                                                                                            | 4                  |
| Quantitative variables       | 11     | Explain how quantitative variables were handled in the analyses. If applicable, describe which groupings were chosen and why                                                         | 7-8                |
| Statistical methods          | 12     | (a) Describe all statistical methods, including those used to control for confounding                                                                                                | 6-8                |
|                              |        | (b) Describe any methods used to examine subgroups and interactions                                                                                                                  | 6-7                |
|                              |        | (c) Explain how missing data were addressed                                                                                                                                          | n/a                |
|                              |        | (d) If applicable, explain how loss to follow-up was addressed                                                                                                                       | n/a                |
|                              |        | (e) Describe any sensitivity analyses                                                                                                                                                | n/a                |
| <b>Results</b>               |        |                                                                                                                                                                                      |                    |

|                          |     |                                                                                                                                                                                                                                                                                                                                                                                                               |                    |
|--------------------------|-----|---------------------------------------------------------------------------------------------------------------------------------------------------------------------------------------------------------------------------------------------------------------------------------------------------------------------------------------------------------------------------------------------------------------|--------------------|
| Participants             | 13* | (a) Report numbers of individuals at each stage of study—eg numbers potentially eligible, examined for eligibility, confirmed eligible, included in the study, completing follow-up, and analysed<br>(b) Give reasons for non-participation at each stage<br>(c) Consider use of a flow diagram                                                                                                               | n/a                |
| Descriptive data         | 14* | (a) Give characteristics of study participants (eg demographic, clinical, social) and information on exposures and potential confounders<br>(b) Indicate number of participants with missing data for each variable of interest<br>(c) Summarise follow-up time (eg, average and total amount)                                                                                                                | n/a                |
| Outcome data             | 15* | Report numbers of outcome events or summary measures over time                                                                                                                                                                                                                                                                                                                                                | n/a                |
| Main results             | 16  | (a) Give unadjusted estimates and, if applicable, confounder-adjusted estimates and their precision (eg, 95% confidence interval). Make clear which confounders were adjusted for and why they were included<br>(b) Report category boundaries when continuous variables were categorized<br>(c) If relevant, consider translating estimates of relative risk into absolute risk for a meaningful time period | 9-11<br>n/a<br>n/a |
| Other analyses           | 17  | Report other analyses done—eg analyses of subgroups and interactions, and sensitivity analyses                                                                                                                                                                                                                                                                                                                | 9                  |
| <b>Discussion</b>        |     |                                                                                                                                                                                                                                                                                                                                                                                                               |                    |
| Key results              | 18  | Summarise key results with reference to study objectives                                                                                                                                                                                                                                                                                                                                                      | 11                 |
| <b>Limitations</b>       |     |                                                                                                                                                                                                                                                                                                                                                                                                               |                    |
| Interpretation           | 20  | Give a cautious overall interpretation of results considering objectives, limitations, multiplicity of analyses, results from similar studies, and other relevant evidence                                                                                                                                                                                                                                    | 12-14              |
| Generalisability         | 21  | Discuss the generalisability (external validity) of the study results                                                                                                                                                                                                                                                                                                                                         | 14                 |
| <b>Other information</b> |     |                                                                                                                                                                                                                                                                                                                                                                                                               |                    |
| Funding                  | 22  | Give the source of funding and the role of the funders for the present study and, if applicable, for the original study on which the present article is based                                                                                                                                                                                                                                                 | 15                 |

\*Give information separately for cases and controls in case-control studies and, if applicable, for exposed and unexposed groups in cohort and cross-sectional studies.

**Note:** An Explanation and Elaboration article discusses each checklist item and gives methodological background and published examples of transparent reporting. The STROBE checklist is best used in conjunction with this article (freely available on the Web sites of PLoS Medicine at <http://www.plosmedicine.org/>, Annals of Internal Medicine at <http://www.annals.org/>, and Epidemiology at <http://www.epidem.com/>). Information on the STROBE Initiative is available at [www.strobe-statement.org](http://www.strobe-statement.org).



# BMJ Open

## Inpatient, Outpatient, Prescribing and Care Home Costs associated with Atrial Fibrillation

|                                 |                                                                                                                                                                                                                                                                                                                                               |
|---------------------------------|-----------------------------------------------------------------------------------------------------------------------------------------------------------------------------------------------------------------------------------------------------------------------------------------------------------------------------------------------|
| Journal:                        | <i>BMJ Open</i>                                                                                                                                                                                                                                                                                                                               |
| Manuscript ID                   | bmjopen-2018-028575.R1                                                                                                                                                                                                                                                                                                                        |
| Article Type:                   | Original research                                                                                                                                                                                                                                                                                                                             |
| Date Submitted by the Author:   | 23-Jul-2019                                                                                                                                                                                                                                                                                                                                   |
| Complete List of Authors:       | Ciminata, Giorgio; University of Glasgow Institute of Health and Wellbeing, Health Economics and Health Technology Assessment (HEHTA)<br>Geue, Claudia; University of Glasgow, Institute of Health and Wellbeing<br>Langhorne, Peter; University of Glasgow, Institute of Cardiovascular and Medical Sciences<br>Wu, O; University of Glasgow |
| <b>Primary Subject Heading</b>: | Health economics                                                                                                                                                                                                                                                                                                                              |
| Secondary Subject Heading:      | Cardiovascular medicine                                                                                                                                                                                                                                                                                                                       |
| Keywords:                       | HEALTH ECONOMICS, Atrial Fibrillation, Stroke < NEUROLOGY, Cost Analysis                                                                                                                                                                                                                                                                      |
|                                 |                                                                                                                                                                                                                                                                                                                                               |

SCHOLARONE™  
Manuscripts

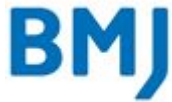

I, the Submitting Author has the right to grant and does grant on behalf of all authors of the Work (as defined in the below author licence), an exclusive licence and/or a non-exclusive licence for contributions from authors who are: i) UK Crown employees; ii) where BMJ has agreed a CC-BY licence shall apply, and/or iii) in accordance with the terms applicable for US Federal Government officers or employees acting as part of their official duties; on a worldwide, perpetual, irrevocable, royalty-free basis to BMJ Publishing Group Ltd ("BMJ") its licensees and where the relevant Journal is co-owned by BMJ to the co-owners of the Journal, to publish the Work in this journal and any other BMJ products and to exploit all rights, as set out in our [licence](#).

The Submitting Author accepts and understands that any supply made under these terms is made by BMJ to the Submitting Author unless you are acting as an employee on behalf of your employer or a postgraduate student of an affiliated institution which is paying any applicable article publishing charge ("APC") for Open Access articles. Where the Submitting Author wishes to make the Work available on an Open Access basis (and intends to pay the relevant APC), the terms of reuse of such Open Access shall be governed by a Creative Commons licence – details of these licences and which [Creative Commons](#) licence will apply to this Work are set out in our licence referred to above.

Other than as permitted in any relevant BMJ Author's Self Archiving Policies, I confirm this Work has not been accepted for publication elsewhere, is not being considered for publication elsewhere and does not duplicate material already published. I confirm all authors consent to publication of this Work and authorise the granting of this licence.

## Inpatient, Outpatient, Prescribing and Care Home Costs associated with Atrial Fibrillation

**Authors:** Ciminata G (Research Assistant)<sup>1</sup>, Geue C (Lecturer in Health Economics)<sup>1</sup>, Langhorne P (Professor of Stroke Care)<sup>2</sup>, Wu O (Professor of Health Technology Assessment)<sup>1</sup>.

1. Health Economics and Health Technology Assessment (HEHTA), Institute of Health & Wellbeing, University of Glasgow, Glasgow G12 8RZ, UK
2. Institute of Cardiovascular & Medical Sciences, University of Glasgow, Glasgow G31 2ER, UK

Corresponding author:

Mr Giorgio Ciminata (MSc), [g.ciminata.1@research.gla.ac.uk](mailto:g.ciminata.1@research.gla.ac.uk)

Cover title: Inpatient, Outpatient, Prescribing and Care Home Costs associated with Atrial Fibrillation

Total number of tables and figures: Figures: 2, Tables: 3

Subject terms: Atrial Fibrillation

Key words: Atrial Fibrillation, Stroke, cost analysis

Word count: 3778

## Abstract

**Objective:** To estimate inpatient, outpatient, prescribing and care-home costs associated with atrial fibrillation (AF), using population-based, individual-level linked data.

**Design:** A two-part model was employed to estimate the probability of resource utilisation and costs conditional on positive utilisation using individual-level linked data.

**Settings:** Scotland, five years following first hospitalisation for AF between 1997 and 2015.

**Participants:** Patients aged  $\geq 50$  years, hospitalised with a known diagnosis of AF or atrial flutter.

**Primary and secondary outcome measures:** Inpatient, outpatient, prescribing and care home costs.

**Results:** The mean annual cost associated with an AF patient was estimated at £3861 (95% CI £3842-£3880). Inpatient admissions and outpatient visits accounted for 77% and 5% of total costs, respectively; prescriptions and care home stay accounted for 4% and 14% of total costs. Inpatient costs was the main driver across all age groups. While inpatient cost contributions (~80%) were constant between 50 and 84 years, they decreased for patients over 85 years. This is offset by increasing care-home cost contributions. Mean annual costs associated with AF increased significantly with increasing number of comorbidities.

**Conclusion:** This study used a contemporary and representative cohort, and a comprehensive approach to estimate costs associated with AF, taking into account resource utilisation beyond hospital care. While overall costs, considerably affected by comorbidity, did not increase with increasing age, care-home costs increased proportionally with age. Inpatient admission was the main contributor to the overall financial burden of AF, highlighting the need for improved mechanisms of early diagnosis to prevent hospitalisations.

## Article summary

### Strengths and limitations of this study

- Costs are estimated through an incidence-based approach using patient-level morbidity records.
- Sufficient follow-up time is used to capture all relevant costs to generate a contemporary estimate of health and care home costs related to AF.
- Scotland offers a robust record linkage system, where administrative patient-level health data are routinely collected.
- Data on primary care consultations were not available for linkage at a national level, however the impact this might have on overall costs is expected to be small.
- The potential risk of AF going undiagnosed and clinical miscoding of morbidity records may lead to an underestimation of the AF cohort and associated costs.

## Introduction

Atrial Fibrillation (AF) is the most common form of arrhythmia. In Scotland AF affects 1.8% of the adult population, and rises to 6% among those aged 65 years or over [1]. In an ageing population, AF has a substantial impact on the economic burden of the healthcare system.

A number of cost analyses on estimating the economic burden of AF exist. The majority of these studies used various definition of the AF study population, based on data sourced from administrative database [2-4], health insurance databases [2, 5-7], hospital records [8, 9] and surveys [10]. Direct medical costs related to inpatient admissions, outpatient visits, as well as prescriptions have been included in these estimates; [2-10] indirect costs related to loss of productivity have been estimated among patients who were at working ages [6, 7].

Many of these studies included relatively young patients – those aged 18-20 years or older [2, 4-6, 8-10], or those under the age of 65 years [7]. However, the prevalence of AF increases significantly with age, and is most affected by patients who are older than 50 years; in patients under the age of 50, AF is often associated with structural heart disease, hyperthyroidism, or alcohol excess [11]. Hence, inclusion of younger patients and the exclusion of older patients may result in imprecise cost estimates.

There is a lack of generalisable studies based on large national population datasets that examine the total and the distribution of costs associated with AF [12]. The aim of this study was to quantify the inpatient, outpatient, prescribing and care home costs associated with AF over a five-year period. Using record-linkage of national datasets from Scotland, we also examined the distribution of costs that are attributable to AF.

## Methods

Cost analyses or cost of illness studies typically adopt either the prevalence or incidence based approaches [13]. In the context of AF, the prevalence based approach determines costs attributable to all cases of AF in a given year, while the incidence based approach determines costs of new cases of AF in a given time period. In the present study, costs were estimated with an incidence-based approach.

## Data

Data were obtained from the Information Services Division (ISD) of NHS Scotland as part of a wider project that used routinely collected data to evaluate clinical effectiveness and cost-effectiveness of Direct Oral Anticoagulants (DOACs) in the prevention of stroke in the AF population. Inpatient records for patients with a diagnosis of AF or atrial flutter between 1997 and 2015 were extracted from the General Acute Inpatient and Day Case Scottish Morbidity Records 01 (SMR01). These records contain all general acute admissions, categorized as inpatients or day cases, discharged from non-obstetric and non-psychiatric specialties [14]. Incident AF events (ICD10 code I48) were identified using all six diagnostic positions in SMR01, with a look back period of five years to minimise double counting. After checking for data entry errors and removal of duplicate records, an initial AF cohort consisting of 279,883 individuals hospitalised with a diagnosis of AF or atrial flutter was identified.

For the purpose of this analysis, only patients aged 50 years or older were included. Based on clinical advice and the evidence that prevalence and incidence of AF typically increase exponentially from 50 years onwards [11], the analysis including 50 years age group at the lowest range would be inclusive of all patients potentially at risk of AF.

1  
2  
3 The choice on the age cut-off for our AF cohort was also based on the indication of oral  
4 anticoagulants for the AF population. Most AF patients in our cohort are also on direct oral  
5 anticoagulants, and patients who are 50 years or older are likely to be on anticoagulants only  
6 because of AF, while patients younger than 50 (only about 3% of AF patients in our cohort)  
7 could be on anticoagulants for reasons other than AF. The final dataset for analysis consisted  
8 of 272,716 patients.  
9  
10  
11  
12  
13  
14  
15  
16  
17  
18

19 Individual-level data linkage was then carried out with outpatient clinic attendance (Outpatient  
20 Attendance Scottish Morbidity Records 00; SMR00), the prescribing information system (PIS),  
21 care home census and mortality records (National Records for Scotland, NRS). Records from  
22 SMR00 include information on new and follow up outpatient appointments for any clinical  
23 specialty [15]. The PIS database includes prescribing records for all medicines and their  
24 associated costs, which are prescribed and dispensed by community pharmacies, dispensing  
25 doctors and a small number of specialist appliance suppliers [16]. The quality of PIS data is  
26 guaranteed by an electronic data capture, and it passes several stages of quality control before  
27 and after data are submitted [17]. The care home census combines the former Residential Care  
28 Home Census (run by the Scottish Government) and the Private Nursing Homes Census (run  
29 by ISD Scotland). Items reported in the care home census include discharge dates to care home  
30 residency such as NHS and private nursing homes, as well as an indication on whether nursing  
31 care is required [16].  
32  
33  
34  
35  
36  
37  
38  
39  
40  
41  
42  
43  
44  
45  
46  
47  
48  
49  
50

51 Patients were followed up for five years following incident AF event in terms of their  
52 healthcare resource use, care home admissions and mortality. Since AF is often a precursor of  
53 stroke and cardiovascular conditions, an estimation of costs for a period of five years post AF  
54 event would allow us to fully capture costs associated with an AF patient. **Costing**  
55  
56  
57  
58  
59  
60



1  
2  
3 Inpatient care costs were obtained from the latest (2013/2014) Scottish National Tariff (SNT),  
4 a list of standard average prices based on Healthcare Resource Groups (HRGs) [17, 18]. The  
5 SNT uses HRG4 for grouping clinically similar treatments that use similar levels of healthcare  
6 resources. After defining a total cost per episode, the total cost for a continuous inpatient stay  
7 (CIS) was calculated. A CIS describes the entire duration of an inpatient stay from the date of  
8 admission to the date of discharge and can consist of several episodes in different specialties.  
9  
10 Since the SNT is based on spells of care (inpatient stay within the same specialty) rather than  
11 individual inpatient episodes or a CIS, a CIS was partitioned into spells when a change in  
12 specialty occurred [17]. If within a CIS, two or more episodes were in the same specialty, only  
13 the highest incurred cost was taken into account, and the remaining episodes were replaced  
14 with a zero cost. Outpatient costs were obtained by assigning outpatient specialty costs, to  
15 outpatient attendances [17]. Unit costs were specific to whether the outpatient attendance took  
16 place at a consultant or nurse led clinic [15].  
17  
18  
19  
20  
21  
22  
23  
24  
25  
26  
27  
28  
29  
30  
31  
32  
33  
34

35 The cost of each prescription dispensed per patient was obtained from PIS [19]. Firstly, the  
36 price per unit was obtained by dividing the item price by the pack size. Secondly, the total  
37 number of items dispensed was obtained by multiplying the number of items dispensed by the  
38 number of instalments. Care home costs, obtained from the care home census, were based on  
39 length of stay or residency. Care home residency was established from care home census  
40 records, reporting admission to a care home like structure [16]. An average of care home  
41 charges for long stay residents was calculated using information on whether nursing care was  
42 provided or not. The average weekly care home charge was expressed per day, so that only the  
43 effective days spent in a care home were costed. The tariffs used for costing account for  
44 inflation, therefore further cost adjustment was not needed.  
45  
46  
47  
48  
49  
50  
51  
52  
53  
54  
55  
56  
57  
58  
59  
60

### **Econometric model**

Healthcare expenditure data are typically characterised by: i) a significant proportion of zero-cost observations for individuals who have not utilised any healthcare resources in a given time period, and ii) a skewed distribution for positive costs. A two-part model was used [20, 21].

In the first part of the model, the probability of using a healthcare service in a given time period was estimated using a probit model (Equation I, please see online supplement). The same explanatory variables were used in the second part of the model, with a gamma distribution and log link, estimating costs conditional on having incurred positive costs (Equation II, please see online supplement). Mean costs per patient per year following their incident AF event were calculated by multiplying first and second modelling part (Equation III, please see online supplement).

In order to account for the skewed nature of cost data, generalised linear models (GLMs) were used. These were compared against ordinary least squares regression (OLS) and log transformed OLS by means of the Akaike Information Criterion (AIC), which measures goodness of fit. When comparing the different models, GLM reported the lowest AIC indicating the best fit for the given set of data. A user-written STATA programme “glm diagnostic.do” [20], performing four different tests simultaneously, was used to identify the most appropriate distributional family and link function.

### **Econometric model covariates**

The two-part model adjusted for age, sex, year of inpatient admission, socio-economic status, urban-rural classification, health board, comorbidities and mortality. These covariates are considered to be the main confounders that have an effect on costs incurred by an AF population.

1  
2  
3 We controlled for age because AF and associated comorbidities are age-related conditions, and  
4 may have an impact on the overall costs. We also assumed costs to vary between males and  
5 females, in particular those for care home residency. Variation in healthcare utilisation and  
6 associated costs and care home residency by socio-economic status is controlled for using the  
7 Scottish Index of Multiple Deprivation (SIMD). The SIMD reflects areas of multiple  
8 deprivation ranked from the most to the least deprived and expressed as quintiles where the  
9 most and the least deprived areas are represented by 1 and 5 respectively [22]. In Scotland,  
10 there are 14 regional health boards responsible for the provision of healthcare [23]. Hence,  
11 potential differences in healthcare utilisation and prescribing costs, may reflect variation in  
12 clinical practice and prescribing behaviour rather than the ability of patients to access care.  
13 Patients living in urban areas may have easier access to care compared to patients living in  
14 more remote areas, which is controlled for including the 8-fold classification measuring rurality  
15 [24].  
16  
17  
18  
19  
20  
21  
22  
23  
24  
25  
26  
27  
28  
29  
30  
31  
32  
33  
34  
35

36 Patients with one or more comorbidities are expected to incur significantly higher costs than  
37 those with none. We accounted for this by including the Charlson comorbidity index, where 1  
38 indicates the absence of comorbidities, 2 the presence of only a single comorbidity and 3 the  
39 presence of more than one comorbidity [25]. Two interaction terms between age and  
40 comorbidities, and mortality and SIMD were included in the econometric model. Intuitively, a  
41 relationship of direct proportionality between age and comorbidities suggests that the level of  
42 comorbidities increases, as patients get older. Similarly, the socio-economic status may  
43 significantly influence the rate of socio-economic inequalities in mortality [26].  
44  
45  
46  
47  
48  
49  
50  
51  
52  
53  
54  
55  
56  
57  
58  
59  
60

## Sensitivity analyses

In order to ascertain whether mortality had an impact on overall AF related healthcare costs, average annual cost per patient by age and for each health or care home sector, was estimated for patients who were alive and those who were dead at the end of the five-year follow-up period. The two econometric models (Equation IV and V, please see online supplement) followed the same structure of the model described in the previous section and used for the main analysis; however, those models were not adjusted for mortality.

## Ethics statement

The authors state that no ethical approval was needed.

## Patients and public involvement

There was no patients or public involvement

## Results

### Cohort characteristics

Of the 272,716 AF patients with a mean age of 71 years (SD 10.6), the majority were identified in the two largest urban health board areas (Greater Glasgow & Clyde and Lothian), accounting for 22.3% and 14.9% respectively. This is also reflected in our categorisation of geographical areas, where large urban represented 38.6% and other urban areas represented 29.8% of the total AF cohort. Greater proportion of patients live in areas belonging to the most deprived quintile compared with those living in the least deprived areas – SIMD quintile 1 and quintile 5 representing 22.6% and 16.4% of the AF cohort respectively (Table1).

### **Econometric modelling results**

Regression results for both modelling parts are presented in Table 2. Overall, an inversely U-shaped association between age and the likelihood of utilising any health or social care services was observed – a gradual increment in the likelihood in resource use with advancing age up to 80 years, when compared with the reference group (50-54 years), while patients 80 years or older showing a decreased probability of utilising healthcare services. However, this association was not observed in the second modelling part model, estimating costs conditional on having incurred positive costs, where a statistically significant gradient between age and costs indicated increasing costs as the cohort ages. The use of health or social care services and associated costs also increased significantly for patients living in the most deprived areas, when compared with patients living in areas with the lowest level of deprivation. The effect of socioeconomic status on healthcare utilisation was also measured for those who are alive at the end of the five-year follow-up period through an interaction term between SIMD and mortality, but no statistically significant effect was found. Full details of regression results for interaction terms are presented in the supplementary online material (Table I, please see online supplement).

For patients with comorbidities, the probabilities of utilising healthcare services were 49.5% (one comorbidity) and 78.6% (two or more comorbidities) greater than the probability for those with no comorbidities. Although healthcare utilisation increased with the number of comorbidities, the interaction term between age and comorbidities indicated that as patients get older the use of healthcare services on average is lower for patients with one or more comorbidities than those with none. The decrease in healthcare utilisation by age is more pronounced in patients with more comorbidities than in those with only one comorbidity.

1  
2  
3 The difference in healthcare costs between comorbidity categories indicated that in the  
4 presence of one or more comorbidities, on average healthcare costs decrease as patients get  
5  
6  
7  
8 older.

9  
10  
11  
12 Full details of regression results for patients who were alive and those who were dead at the  
13 end of the five-year follow-up period are presented in the supplementary online material (Table  
14  
15  
16  
17 II - V, please see online supplement).

### 23 24 **Cost estimates**

25  
26 The estimated mean annual cost per AF patient was £3861 (95% CI: £3842-£3880). The  
27  
28  
29  
30  
31  
32  
33  
34  
35  
36  
37  
38  
39  
40  
41  
42  
43  
44  
45  
46  
47  
48  
49  
50  
51  
52  
53  
54  
55  
56  
57  
58  
59  
60  
61  
62  
63  
64  
65  
66  
67  
68  
69  
70  
71  
72  
73  
74  
75  
76  
77  
78  
79  
80  
81  
82  
83  
84  
85  
86  
87  
88  
89  
90  
91  
92  
93  
94  
95  
96  
97  
98  
99  
100  
101  
102  
103  
104  
105  
106  
107  
108  
109  
110  
111  
112  
113  
114  
115  
116  
117  
118  
119  
120  
121  
122  
123  
124  
125  
126  
127  
128  
129  
130  
131  
132  
133  
134  
135  
136  
137  
138  
139  
140  
141  
142  
143  
144  
145  
146  
147  
148  
149  
150  
151  
152  
153  
154  
155  
156  
157  
158  
159  
160  
161  
162  
163  
164  
165  
166  
167  
168  
169  
170  
171  
172  
173  
174  
175  
176  
177  
178  
179  
180  
181  
182  
183  
184  
185  
186  
187  
188  
189  
190  
191  
192  
193  
194  
195  
196  
197  
198  
199  
200  
201  
202  
203  
204  
205  
206  
207  
208  
209  
210  
211  
212  
213  
214  
215  
216  
217  
218  
219  
220  
221  
222  
223  
224  
225  
226  
227  
228  
229  
230  
231  
232  
233  
234  
235  
236  
237  
238  
239  
240  
241  
242  
243  
244  
245  
246  
247  
248  
249  
250  
251  
252  
253  
254  
255  
256  
257  
258  
259  
260  
261  
262  
263  
264  
265  
266  
267  
268  
269  
270  
271  
272  
273  
274  
275  
276  
277  
278  
279  
280  
281  
282  
283  
284  
285  
286  
287  
288  
289  
290  
291  
292  
293  
294  
295  
296  
297  
298  
299  
300  
301  
302  
303  
304  
305  
306  
307  
308  
309  
310  
311  
312  
313  
314  
315  
316  
317  
318  
319  
320  
321  
322  
323  
324  
325  
326  
327  
328  
329  
330  
331  
332  
333  
334  
335  
336  
337  
338  
339  
340  
341  
342  
343  
344  
345  
346  
347  
348  
349  
350  
351  
352  
353  
354  
355  
356  
357  
358  
359  
360  
361  
362  
363  
364  
365  
366  
367  
368  
369  
370  
371  
372  
373  
374  
375  
376  
377  
378  
379  
380  
381  
382  
383  
384  
385  
386  
387  
388  
389  
390  
391  
392  
393  
394  
395  
396  
397  
398  
399  
400  
401  
402  
403  
404  
405  
406  
407  
408  
409  
410  
411  
412  
413  
414  
415  
416  
417  
418  
419  
420  
421  
422  
423  
424  
425  
426  
427  
428  
429  
430  
431  
432  
433  
434  
435  
436  
437  
438  
439  
440  
441  
442  
443  
444  
445  
446  
447  
448  
449  
450  
451  
452  
453  
454  
455  
456  
457  
458  
459  
460  
461  
462  
463  
464  
465  
466  
467  
468  
469  
470  
471  
472  
473  
474  
475  
476  
477  
478  
479  
480  
481  
482  
483  
484  
485  
486  
487  
488  
489  
490  
491  
492  
493  
494  
495  
496  
497  
498  
499  
500  
501  
502  
503  
504  
505  
506  
507  
508  
509  
510  
511  
512  
513  
514  
515  
516  
517  
518  
519  
520  
521  
522  
523  
524  
525  
526  
527  
528  
529  
530  
531  
532  
533  
534  
535  
536  
537  
538  
539  
540  
541  
542  
543  
544  
545  
546  
547  
548  
549  
550  
551  
552  
553  
554  
555  
556  
557  
558  
559  
560  
561  
562  
563  
564  
565  
566  
567  
568  
569  
570  
571  
572  
573  
574  
575  
576  
577  
578  
579  
580  
581  
582  
583  
584  
585  
586  
587  
588  
589  
590  
591  
592  
593  
594  
595  
596  
597  
598  
599  
600  
601  
602  
603  
604  
605  
606  
607  
608  
609  
610  
611  
612  
613  
614  
615  
616  
617  
618  
619  
620  
621  
622  
623  
624  
625  
626  
627  
628  
629  
630  
631  
632  
633  
634  
635  
636  
637  
638  
639  
640  
641  
642  
643  
644  
645  
646  
647  
648  
649  
650  
651  
652  
653  
654  
655  
656  
657  
658  
659  
660  
661  
662  
663  
664  
665  
666  
667  
668  
669  
670  
671  
672  
673  
674  
675  
676  
677  
678  
679  
680  
681  
682  
683  
684  
685  
686  
687  
688  
689  
690  
691  
692  
693  
694  
695  
696  
697  
698  
699  
700  
701  
702  
703  
704  
705  
706  
707  
708  
709  
710  
711  
712  
713  
714  
715  
716  
717  
718  
719  
720  
721  
722  
723  
724  
725  
726  
727  
728  
729  
730  
731  
732  
733  
734  
735  
736  
737  
738  
739  
740  
741  
742  
743  
744  
745  
746  
747  
748  
749  
750  
751  
752  
753  
754  
755  
756  
757  
758  
759  
760  
761  
762  
763  
764  
765  
766  
767  
768  
769  
770  
771  
772  
773  
774  
775  
776  
777  
778  
779  
780  
781  
782  
783  
784  
785  
786  
787  
788  
789  
790  
791  
792  
793  
794  
795  
796  
797  
798  
799  
800  
801  
802  
803  
804  
805  
806  
807  
808  
809  
810  
811  
812  
813  
814  
815  
816  
817  
818  
819  
820  
821  
822  
823  
824  
825  
826  
827  
828  
829  
830  
831  
832  
833  
834  
835  
836  
837  
838  
839  
840  
841  
842  
843  
844  
845  
846  
847  
848  
849  
850  
851  
852  
853  
854  
855  
856  
857  
858  
859  
860  
861  
862  
863  
864  
865  
866  
867  
868  
869  
870  
871  
872  
873  
874  
875  
876  
877  
878  
879  
880  
881  
882  
883  
884  
885  
886  
887  
888  
889  
890  
891  
892  
893  
894  
895  
896  
897  
898  
899  
900  
901  
902  
903  
904  
905  
906  
907  
908  
909  
910  
911  
912  
913  
914  
915  
916  
917  
918  
919  
920  
921  
922  
923  
924  
925  
926  
927  
928  
929  
930  
931  
932  
933  
934  
935  
936  
937  
938  
939  
940  
941  
942  
943  
944  
945  
946  
947  
948  
949  
950  
951  
952  
953  
954  
955  
956  
957  
958  
959  
960  
961  
962  
963  
964  
965  
966  
967  
968  
969  
970  
971  
972  
973  
974  
975  
976  
977  
978  
979  
980  
981  
982  
983  
984  
985  
986  
987  
988  
989  
990  
991  
992  
993  
994  
995  
996  
997  
998  
999  
1000

The estimated total costs and distribution of costs according to sex are shown in Table 3. While there is little difference between the total costs and the distribution of costs for inpatient, outpatient and prescription costs, the difference seems more pronounced when comparing the care home component of costs (5% of total costs among males vs 7% of total costs among females).

The average annual cost per AF patient by age and for each health or care home sector is shown in Figure 1. Considering the individual contribution of each cost component to the overall costs, inpatient costs was the main driver across all age groups. While inpatient cost contribution remained constant with an average contribution of about 80% to the overall cost for patients aged between 50 and 84 years, it decreased for patients over 85 years of age. Similar patterns were observed for outpatient and prescribing costs. On the contrary, the contribution of care home costs to the overall costs increased with age (0.5% for patients aged 50-54 years and approximately 11% for patients who are 90 years or older).

1  
2  
3 The contribution of each setting to the total health and care home costs by the number of  
4 existing comorbidities is illustrated in Figure 2. While inpatient and total costs vary  
5 considerably with the number of comorbidities, outpatient and care home contributions remain  
6 fairly constant.  
7  
8  
9  
10  
11  
12  
13  
14

15 The estimated mean annual cost per AF patient alive at the end of the five-year follow-up  
16 period was £3110 (95% CI: £3090-£3131). The average annual cost per AF patient by age and  
17 for each health or care home sector is presented in the supplementary online material (Figure  
18 I, please see online supplement). For these patients, inpatient costs was the main driver across  
19 all age groups; a gradient between age and costs indicated increasing costs as the cohort ages.  
20  
21  
22  
23  
24  
25  
26 Similar patterns were observed for care home costs. On the contrary, outpatient and prescribing  
27 costs remained constant up to 74 years, but decreased slightly for older patients.  
28  
29  
30  
31  
32

33 The estimated mean annual cost per AF patient who died during the five-year follow-up period,  
34 was £2299 (95% CI: £2279-£2319) (Figure II, please see online supplement). For these  
35 patients, inpatient costs was the main driver across all age groups; a gradient between age and  
36 costs indicated decreasing costs as the cohort ages. This was also observed for outpatient and  
37 prescribing costs; but care home costs on average increased across age groups.  
38  
39  
40  
41  
42  
43  
44  
45  
46  
47  
48  
49  
50  
51  
52  
53  
54  
55  
56  
57  
58  
59  
60

## Discussion

A greater proportion of AF patients were found in areas with the highest index of deprivation. This, combined with the likelihood for people living in the most deprived quintile having longer inpatient stays due to a lack of support at home, may explain the difference in inpatient care utilisation between patients from the most and the least deprived areas, with associated costs being higher for the former group. As AF is more likely to affect the elderly, AF related costs were expected to increase with age. As health deteriorates with age, older age groups are assumed to make greater use of healthcare services, and therefore incur higher costs than younger age groups. However, age was found to have a modest impact on overall healthcare costs, being fairly consistent across age groups. This finding is in line with existing evidence indicating that healthcare expenditure depends not only on patients' calendar age, but is also significantly associated with remaining lifetime [27].

Any observed correlation between healthcare expenditure and age may therefore be attributable to the fact that the proportion of patients who are at the end of their lives is substantially greater in older rather than younger age groups [27]. On the other hand, comorbidity had a considerable effect on the overall cost, increasing significantly in patients with more than one comorbidity. However, the decrease in healthcare utilisation by age is more pronounced in patients with more comorbidities than in those with only one comorbidity. Decreasing inpatient and outpatient costs for the oldest patients were offset by increasing care home costs, in particular for women. Indeed, the main cause for higher overall costs incurred by women is attributable to the higher likelihood for elderly women to reside in care homes. Interestingly, care home contribution to the overall costs was noticeably lower for patients with multiple comorbidities than for those with none or one comorbidity. This may suggest that sicker patients are more likely to be in hospital than in a care home.



1  
2  
3 To date, only one single study published in 2004 has estimated the cost of AF in Scotland; the  
4 authors estimated the cost of AF in 1995/1996, and projected these to the year 2000 [28].  
5  
6 Previous work has focussed on a 12-months follow-up, which seems limited in order to capture  
7  
8 all healthcare resource utilisation for AF patients. Our study offers a longer follow-up and a  
9  
10 contemporary estimate of healthcare costs related to AF including all relevant care settings.  
11  
12 Our study offers a distinct advantage over previous work as costs, rather than being based on  
13  
14 extrapolated rates using a prevalence-based approach [28], are estimated with an incidence-  
15  
16 based method using patient-level morbidity records. Using an incidence based approach to  
17  
18 costing and a broad perspective to capture the majority of costs associated with AF, several  
19  
20 routinely collected administrative datasets from Scotland were combined, including care home  
21  
22 utilisation.  
23  
24  
25  
26  
27  
28  
29  
30

31 Existing studies, including ours, regardless of econometric model choice and covariates used,  
32  
33 show that costs due to inpatient admission are the main contributor to overall AF related  
34  
35 healthcare cost. This is a pertinent finding that may well support future policies on  
36  
37 opportunistic screening in the population at risk of AF, and in particular in Scotland where 1  
38  
39 in 3 patients with AF are currently undiagnosed [29]. The European AF management guidelines  
40  
41 and the Scottish Cross-Party Group 'Heart Disease and Stroke', recently recommended that  
42  
43 people who are 65 years or older and at risk of AF and associated comorbidities such as  
44  
45 cardiovascular disease, diabetes or respiratory disease should be screened opportunistically in  
46  
47 primary care, pharmacies or community settings [29, 30]. With rigorous screening and  
48  
49 appropriate treatment, hospitalisations could be avoided and costs reduced.  
50  
51  
52  
53  
54  
55  
56  
57  
58  
59  
60

1  
2  
3 Although we have captured most healthcare sectors and related costs, we were not able to  
4 obtain national data on primary care consultations, as these data are currently not routinely  
5 available for linkage in Scotland. Not capturing these data, may lead to an underestimation of  
6 the size of the AF cohort and associated costs.  
7  
8  
9  
10  
11  
12

13  
14 However, the costs associated with primary care consultations is expected to have a limited  
15 impact on the overall total AF related costs. Such underestimation could also result from AF  
16 going undiagnosed and clinical miscoding of morbidity records. Nevertheless, by using a  
17 cohort of patients hospitalised with AF we were able to capture more severe cases of AF.  
18 Prescribing and care home data were only available respectively from 2009 to 2012, their  
19 contribution to overall AF related costs might also be underestimated. Other limitations are  
20 inherent to the nature of administrative data, such as missing records or incomplete data.  
21  
22  
23  
24  
25  
26  
27  
28  
29  
30  
31  
32

33 Further, we acknowledge the issue concerning attributing AF related costs to patients with a  
34 structural heart disease, as AF may manifest subsequently because of this. In our analysis, we  
35 identified about 14% of AF patients with a structural heart disease; these were patients with  
36 systolic dysfunction, valvular heart disease or heart valve replacement. However, from the  
37 hospital data it was not possible to establish causation between structural heart disease and AF.  
38  
39  
40  
41  
42  
43  
44  
45  
46

47 Recognising these limitations, we were nevertheless able to harness high quality patient-level  
48 linked data to identify a cohort of AF patients and to estimate AF related costs in Scotland.  
49  
50  
51  
52  
53  
54  
55  
56  
57  
58  
59  
60

1  
2  
3 The inclusion of all available cost components is crucial for establishing overall costs, as these  
4 often extend beyond hospitalisation. The study identifies hospitalisation as the main cost driver  
5 and suggests that the implementation of AF screening policies could substantially reduce AF  
6 related health care costs. Most importantly, the study concludes that patient's age has a limited  
7 impact on the overall AF related cost, and therefore may contribute much less to future growth  
8 of AF related cost in an ever-ageing Scottish population .  
9  
10  
11  
12  
13  
14  
15  
16  
17  
18

19 Future work will be able to utilise Scottish Stroke Care Audit (SSCA) records, allowing for the  
20 identification of additional AF patients; these are patients hospitalised with a stroke, where AF  
21 has been recorded in audit data as an underlying comorbidity. Being able to complement  
22 inpatient records with SSCA records will allow us to capture more AF patients in Scotland.  
23 Moreover, future research may be able to include indirect costs associated with productivity-  
24 loss by linking morbidity and prescribing data to national data from the Department for Work  
25 and Pensions, for instance.  
26  
27  
28  
29  
30  
31  
32  
33  
34  
35  
36  
37  
38  
39  
40  
41  
42  
43  
44  
45  
46  
47  
48  
49  
50  
51  
52  
53  
54  
55  
56  
57  
58  
59  
60

1  
2  
3 **Acknowledgements:** We thank the members of the Information Services Division, National  
4 Services Scotland, for their support. We acknowledge the support from The Farr Institute @  
5 Scotland. The Farr Institute @ Scotland is supported by a 10-funder consortium: Arthritis  
6 Research UK, the British Heart Foundation, Cancer Research UK, the Economic and Social  
7 Research Council, the Engineering and Physical Sciences Research Council, the Medical  
8 Research Council, the National Institute of Health Research, the National Institute for Social  
9 Care and Health Research (Welsh Assembly Government), the Chief Scientist Office (Scottish  
10 Government Health Directorates), the Wellcome Trust (MRC Grant No: MR/K007017/1).  
11  
12  
13  
14  
15  
16  
17  
18  
19  
20  
21

22 **Author contributions:** GC, CG, PL and OW conceived the article. GC carried out the  
23 statistical analysis and prepared the first draft of the manuscript. GC, CG, PL and OW  
24 contributed to editing the manuscript and approved the final version submitted for  
25 publication.  
26  
27  
28  
29  
30

31 **Funding sources:** This work was supported by Farr Institute for Health Informatics Research,  
32 Scotland, MRC, grant number MR/K007017/1  
33  
34  
35

36 **Competing interest:** The authors declare no conflict of interest.  
37

38 **Data Statement:** All data underlying the analyses are confidential and subject to disclosure  
39 control. Data can only be obtained through application to Information Services Division (ISD)  
40 via the Public Benefit and Privacy Panel (PBPP).  
41  
42  
43  
44  
45  
46  
47  
48  
49  
50  
51  
52  
53  
54  
55  
56  
57  
58  
59  
60

## References

1. Scotland, H.I. *Prevention of stroke in patients with atrial fibrillation*. 2013 [cited 2016 January 2016]; Available from: [http://www.sign.ac.uk/assets/af\\_publication.pdf](http://www.sign.ac.uk/assets/af_publication.pdf).
2. Bennell, M.C., et al., *Identifying predictors of cumulative healthcare costs in incident atrial fibrillation: a population-based study*. J Am Heart Assoc, 2015. **4**(4).
3. Hallinen, T., et al., *Direct costs of warfarin treatment among patients with atrial fibrillation in a Finnish health care setting*. Curr Med Res Opin, 2006. **22**(4): p. 683-92.
4. Nelson, W.W., et al., *Out-of-range international normalized ratio values and healthcare cost among new warfarin patients with non-valvular atrial fibrillation*. J Med Econ, 2015. **18**(5): p. 333-40.
5. Ghate, S.R., et al., *All-cause and bleeding-related health care costs in warfarin-treated patients with atrial fibrillation*. J Manag Care Pharm, 2011. **17**(9): p. 672-84.
6. Rohrbacker, N.J., et al., *The burden of atrial fibrillation and other cardiac arrhythmias in an employed population: associated costs, absences, and objective productivity loss*. J Occup Environ Med, 2010. **52**(4): p. 383-91.
7. Wu, E.Q., et al., *Economic burden and co-morbidities of atrial fibrillation in a privately insured population*. Curr Med Res Opin, 2005. **21**(10): p. 1693-9.
8. Holstenson, E., et al., *Predictors of costs related to cardiovascular disease among patients with atrial fibrillation in five European countries*. Europace, 2011. **13**(1): p. 23-30.
9. Reynolds, M.R., et al., *Healthcare resource utilization and costs associated with recurrent episodes of atrial fibrillation: the FRACTAL registry*. J Cardiovasc Electrophysiol, 2007. **18**(6): p. 628-33.
10. Jonsson, L., et al., *Cost of illness and drivers of cost in atrial fibrillation in Sweden and Germany*. Appl Health Econ Health Policy, 2010. **8**(5): p. 317-25.
11. Sankaranarayanan, R., et al., *Comparison of Atrial Fibrillation in the Young versus That in the Elderly: A Review*. Cardiology Research and Practice, 2013. **2013**: p. 16.
12. Johnsen, S.P., et al., *Cost of illness of atrial fibrillation: a nationwide study of societal impact*. BMC Health Services Research, 2017. **17**(1): p. 714.
13. Tarricone, R., *Cost-of-illness analysis. What room in health economics?* Health Policy, 2006. **77**(1): p. 51-63.
14. Scotland, I.S.D. *General Acute Inpatient and Day Case - Scottish Morbidity Record (SMR01)*. 2015 [cited 2017; Available from: <http://www.ndc.scot.nhs.uk/National-Datasets/data.asp?SubID=2>].
15. Scotland, I.S.D. *Outpatient Attendance (SMR00)*. 2015 [cited 2015 January 2015]; Available from: <http://www.ndc.scot.nhs.uk/National-Datasets/data.asp?SubID=2>.
16. Scotland, I.S.D. *Care Home Census 2015*. 2015 November 2015]; Available from: <http://www.isdscotland.org/Health-Topics/Health-and-Social-Community-Care/Care-Homes/Previous-Publications/>.
17. Scotland, I.S.D. *Scottish National Tariff*. 2015 [cited 2015 December 2015]; Available from: <http://www.isdscotland.org/Health-Topics/Finance/Scottish-National-Tariff/>.
18. Groups, H.R. *Healthcare Resource Groups*. 2015 November 2015]; Available from: <http://www.hscic.gov.uk/hrg>.
19. Alvarez-Madrado, S., et al., *Data Resource Profile: The Scottish National Prescribing Information System (PIS)*. International Journal of Epidemiology, 2016.

- 1
  - 2
  - 3
  - 4
  - 5
  - 6
  - 7
  - 8
  - 9
  - 10
  - 11
  - 12
  - 13
  - 14
  - 15
  - 16
  - 17
  - 18
  - 19
  - 20
  - 21
  - 22
  - 23
  - 24
  - 25
  - 26
  - 27
  - 28
  - 29
  - 30
  - 31
  - 32
  - 33
  - 34
  - 35
  - 36
  - 37
  - 38
  - 39
  - 40
  - 41
  - 42
  - 43
  - 44
  - 45
  - 46
  - 47
  - 48
  - 49
  - 50
  - 51
  - 52
  - 53
  - 54
  - 55
  - 56
  - 57
  - 58
  - 59
  - 60
20. Henry, A.G., et al., *Economic Evaluation in Clinical Trials*. 'Oxford University Press': Oxford, UK.
21. Manning, W.G., A. Basu, and J. Mullahy, *Generalized modeling approaches to risk adjustment of skewed outcomes data*. *Journal of Health Economics*, 2005. **24**(3): p. 465-488.
22. Government, T.S. *Scottish Index of Multiple Deprivation*. 2015 [cited 2015 November 2015]; Available from: <http://www.gov.scot/Topics/Statistics/SIMD>.
23. Government, T.S. *NHS Boards*. 2015 [cited 2015 January 2015]; Available from: <http://www.gov.scot/Topics/Health/NHS-Workforce/NHS-Boards>.
24. Government, T.S. *Scottish Government Urban Rural Classification*. 2015 [cited 2015 January 2015]; Available from: <http://www.gov.scot/Topics/Statistics/About/Methodology/UrbanRuralClassification>.
25. Charlson, M.E., et al., *A new method of classifying prognostic comorbidity in longitudinal studies: Development and validation*. *Journal of Chronic Diseases*, 1987. **40**(5): p. 373-383.
26. Leyland, A.H., et al., *Cause-specific inequalities in mortality in Scotland: two decades of change. A population-based study*. *BMC Public Health*, 2007. **7**: p. 172.
27. Zweifel, P., S. Felder, and M. Meiers, *Ageing of population and health care expenditure: a red herring?* *Health Econ*, 1999. **8**(6): p. 485-96.
28. Stewart, S., et al., *Cost of an emerging epidemic: an economic analysis of atrial fibrillation in the UK*. *Heart*, 2004. **90**(3): p. 286-292.
29. Stroke, C.-P.G.o.H.D.a. *A Focus on Atrial Fibrillation in Scotland 2017*. 2017 March 2018]; Available from: <https://www.chss.org.uk/documents/2018/01/a-focus-on-atrial-fibrillation-in-scotland-pdf.pdf>.
30. Camm, A.J., et al., *2012 focused update of the ESC Guidelines for the management of atrial fibrillation: an update of the 2010 ESC Guidelines for the management of atrial fibrillation. Developed with the special contribution of the European Heart Rhythm Association*. *Eur Heart J*, 2012. **33**(21): p. 2719-47.

## Figure legends

**Figure 1.** Average annual costs per patient hospitalised with AF by sector. Cost components with confidence interval are presented for each age group.

**Figure 2.** Average cost per patient hospitalised with AF by Charlson Comorbidity Index. Cost components with confidence interval are presented for each Comorbidity category.

For peer review only

## Tables

**Table 1. Baseline characteristics of AF patients 50 years or older**

| Characteristics                           | N (%)                  |
|-------------------------------------------|------------------------|
| Number of patients                        | 272,716                |
| Mean age at first admission*(SD)**(range) | 71 *(10.6) **(50 -108) |
| Sex                                       |                        |
| Male                                      | 135,683 (49.8)         |
| Female                                    | 137,033 (50.2)         |
| Health Boards                             |                        |
| Greater Glasgow & Clyde                   | 60,774 (22.3)          |
| Lothian                                   | 40,498 (14.9)          |
| Lanarkshire                               | 30,105 (11.0)          |
| Grampian                                  | 25,208 (9.2)           |
| Ayrshire & Arran                          | 24,468 (7.9)           |
| Tayside                                   | 21,543 (9.0)           |
| Fife                                      | 18,584 (6.8)           |
| Highland                                  | 17,612 (6.5)           |
| Forth valley                              | 13,308 (4.9)           |
| Dumfries & Galloway                       | 9,645 (3.5)            |
| Borders                                   | 7,148 (2.6)            |
| Western isles                             | 1,812 (0.7)            |
| Shetland                                  | 1,009 (0.4)            |
| Orkney                                    | 1,002 (0.4)            |
| Geography                                 |                        |
| Large/urban                               | 104,841 (38.4)         |
| Other/urban                               | 80,794 (29.6)          |
| Accessible small towns                    | 24,492 (9.0)           |
| Remote small towns                        | 8,126 (3.0)            |
| Very remote small towns                   | 3,712 (1.4)            |
| Accessible rural                          | 30,122 (11.1)          |
| Remote rural                              | 10,277 (3.8)           |
| Very remote rural                         | 9,908 (3.6)            |
| SIMD quintile                             |                        |
| 1                                         | 61,686 (22.6)          |
| 2                                         | 61,704 (22.6)          |
| 3                                         | 54,937 (20.1)          |
| 4                                         | 49,448 (18.1)          |
| 5                                         | 44,933 (16.4)          |
| Comorbidity                               |                        |
| no comorbidity                            | 36,345 (13.4)          |
| 1 comorbidity                             | 52,159 (19.2)          |
| >1 comorbidities                          | 182,827 (67.4)         |
| Re-hospitalised (any condition)           | 173,120 (63.7)         |
| Admitted to care-home                     | 7,091 (2.6)            |
| Mortality                                 |                        |



|       |                |
|-------|----------------|
| Alive | 200,446 (73.5) |
| Dead  | 72,270 (26.5)  |

**Table 2. Regression results: probability of healthcare resources utilisation and cost estimation**

| Covariates               | Probability<br>(1 <sup>st</sup> modelling part) |          | Cost Ratios<br>(2 <sup>nd</sup> modelling part) |          |
|--------------------------|-------------------------------------------------|----------|-------------------------------------------------|----------|
|                          | Coefficient (95% CI)                            | Std. Err | Coefficient (95% CI)                            | Std. Err |
| <b>Age group (years)</b> |                                                 |          |                                                 |          |
| 50-54                    | Reference                                       |          |                                                 |          |
| 55-59                    | 0.036 (-0.034, 0.107)                           | 0.036    | 0.045 (-0.005, 0.096)                           | 0.026    |
| 60-64                    | 0.113 (0.045, 0.180)                            | 0.034    | 0.088 (0.040, 0.136)                            | 0.025    |
| 65-69                    | 0.134 (0.069, 0.199)                            | 0.033    | 0.120 (0.073, 0.167)                            | 0.024    |
| 70-74                    | 0.126 (0.062, 0.191)                            | 0.033    | 0.176 (0.130, 0.221)                            | 0.023    |
| 75-79                    | 0.182 (0.118, 0.247)                            | 0.033    | 0.183 (0.138, 0.228)                            | 0.023    |
| 80-84                    | 0.075 (0.009, 0.141)                            | 0.034    | 0.246 (0.200, 0.292)                            | 0.023    |
| 85-89                    | 0.022 (-0.048, 0.091)                           | 0.035    | 0.334 (0.286, 0.382)                            | 0.024    |
| 90-max                   | -0.208 (-0.283, -0.132)                         | 0.039    | 0.474 (0.420, 0.527)                            | 0.027    |
| <b>Sex</b>               |                                                 |          |                                                 |          |
| Male                     | Reference                                       |          |                                                 |          |
| Female                   | 0.029 (0.012, 0.047)                            | 0.009    | 0.052 (0.042, 0.062)                            | 0.005    |
| Date of admission        | 0.173 (0.172, 0.175)                            | 0.001    | -0.023 (-0.024, -0.022)                         | 0.001    |
| <b>SIMD quintile</b>     |                                                 |          |                                                 |          |
| 1                        | Reference                                       |          |                                                 |          |
| 2                        | 0.036 (-0.012, 0.083)                           | 0.024    | -0.054 (-0.079, -0.028)                         | 0.013    |
| 3                        | -0.028 (-0.075, 0.019)                          | 0.024    | -0.075 (-0.102, -0.049)                         | 0.014    |
| 4                        | -0.031 (-0.078, 0.017)                          | 0.024    | -0.106 (-0.132, -0.080)                         | 0.013    |
| 5                        | -0.042 (-0.090, 0.006)                          | 0.024    | -0.139 (-0.165, -0.113)                         | 0.013    |
| <b>Geography</b>         |                                                 |          |                                                 |          |
| Large urban              | Reference                                       |          |                                                 |          |
| Other urban              | -0.144 (-0.171, -0.118)                         | 0.013    | -0.024 (-0.039, -0.010)                         | 0.007    |
| Accessible small towns   | -0.163 (-0.197, -0.128)                         | 0.018    | -0.040 (-0.059, -0.021)                         | 0.010    |
| Accessible rural         | -0.213 (-0.247, -0.180)                         | 0.017    | -0.044 (-0.063, -0.025)                         | 0.010    |
| Remote small towns       | -0.160 (-0.213, -0.106)                         | 0.027    | 0.002 (-0.030, 0.034)                           | 0.016    |
| Remote rural             | -0.298 (-0.347, -0.250)                         | 0.025    | -0.038 (-0.067, -0.009)                         | 0.015    |
| Very remote small towns  | -0.398 (-0.480, -0.315)                         | 0.042    | -0.053 (-0.105, -0.002)                         | 0.026    |
| Very remote rural        | -0.371 (-0.434, -0.308)                         | 0.032    | -0.059 (-0.100, -0.018)                         | 0.021    |
| <b>Health boards</b>     |                                                 |          |                                                 |          |
| Great Glasgow and Clyde  | Reference                                       |          |                                                 |          |
| Lothian                  | -0.041 (-0.073, -0.010)                         | 0.016    | -0.032 (-0.049, -0.016)                         | 0.008    |
| Lanarkshire              | 0.003 (-0.031, 0.038)                           | 0.018    | -0.065 (-0.084, -0.047)                         | 0.009    |
| Ayrshire and Arran       | -0.356 (-0.393, -0.318)                         | 0.019    | -0.044 (-0.066, -0.022)                         | 0.011    |

|    |                          |                         |       |                         |       |
|----|--------------------------|-------------------------|-------|-------------------------|-------|
| 1  |                          |                         |       |                         |       |
| 2  |                          |                         |       |                         |       |
| 3  | Grampian                 | 0.020 (-0.018, 0.058)   | 0.019 | -0.059 (-0.079, -0.039) | 0.010 |
| 4  | Tayside                  | -0.401 (-0.436, -0.365) | 0.018 | -0.084 (-0.104, -0.063) | 0.010 |
| 5  | Fife                     | -0.055 (-0.099, -0.012) | 0.022 | -0.007 (-0.031, 0.018)  | 0.012 |
| 6  | Highland                 | -0.156 (-0.209, -0.104) | 0.027 | -0.047 (-0.078, -0.016) | 0.016 |
| 7  | Forth Valley             | -0.473 (-0.516, -0.431) | 0.022 | -0.113 (-0.139, -0.087) | 0.013 |
| 8  | Dumfries and Galloway    | -0.303 (-0.353, -0.252) | 0.026 | -0.137 (-0.167, -0.106) | 0.015 |
| 9  | Borders                  | -0.487 (-0.541, -0.434) | 0.027 | -0.090 (-0.124, -0.056) | 0.017 |
| 10 | Western Isles            | -1.075 (-1.176, -0.974) | 0.052 | 0.473 (0.396, 0.550)    | 0.039 |
| 11 | Orkney                   | -0.374 (-0.507, -0.240) | 0.068 | -0.030 (-0.119, 0.059)  | 0.045 |
| 12 | Shetland                 | -0.490 (-0.622, -0.359) | 0.067 | -0.094 (-0.192, 0.003)  | 0.050 |
| 13 |                          |                         |       |                         |       |
| 14 | Mortality within 5 years |                         |       |                         |       |
| 15 | Alive                    | Reference               |       |                         |       |
| 16 | Dead                     | 0.444 (0.400, 0.488)    | 0.023 | 0.662 (0.639 - 0.684)   | 0.011 |
| 17 |                          |                         |       |                         |       |
| 18 | Comorbidity              |                         |       |                         |       |
| 19 | no comorbidities         | Reference               |       |                         |       |
| 20 | 1 comorbidity            | 0.495 (0.382, 0.607)    | 0.057 | 0.358 (0.277, 0.438)    | 0.041 |
| 21 | >1 comorbidities         | 0.786 (0.631, 0.942)    | 0.079 | 0.774 (0.702, 0.845)    | 0.037 |
| 22 |                          |                         |       |                         |       |
| 23 |                          |                         |       |                         |       |
| 24 |                          |                         |       |                         |       |
| 25 |                          |                         |       |                         |       |
| 26 |                          |                         |       |                         |       |
| 27 |                          |                         |       |                         |       |
| 28 |                          |                         |       |                         |       |
| 29 |                          |                         |       |                         |       |
| 30 |                          |                         |       |                         |       |
| 31 |                          |                         |       |                         |       |
| 32 |                          |                         |       |                         |       |
| 33 |                          |                         |       |                         |       |
| 34 |                          |                         |       |                         |       |
| 35 |                          |                         |       |                         |       |
| 36 |                          |                         |       |                         |       |
| 37 |                          |                         |       |                         |       |
| 38 |                          |                         |       |                         |       |
| 39 |                          |                         |       |                         |       |
| 40 |                          |                         |       |                         |       |
| 41 |                          |                         |       |                         |       |
| 42 |                          |                         |       |                         |       |
| 43 |                          |                         |       |                         |       |
| 44 |                          |                         |       |                         |       |
| 45 |                          |                         |       |                         |       |
| 46 |                          |                         |       |                         |       |
| 47 |                          |                         |       |                         |       |
| 48 |                          |                         |       |                         |       |
| 49 |                          |                         |       |                         |       |
| 50 |                          |                         |       |                         |       |
| 51 |                          |                         |       |                         |       |
| 52 |                          |                         |       |                         |       |
| 53 |                          |                         |       |                         |       |
| 54 |                          |                         |       |                         |       |
| 55 |                          |                         |       |                         |       |
| 56 |                          |                         |       |                         |       |
| 57 |                          |                         |       |                         |       |
| 58 |                          |                         |       |                         |       |
| 59 |                          |                         |       |                         |       |
| 60 |                          |                         |       |                         |       |

**Table 3. Average annual costs per patient hospitalised with AF by sex**

| Sex        | Cost estimates      |              |
|------------|---------------------|--------------|
|            | Mean total cost (%) | 95% CI       |
| Male       |                     |              |
| Inpatient  | 3004 (80.06)        | (2983, 3025) |
| Outpatient | 314 (8.38)          | (312, 317)   |
| Care home  | 172 (4.58)          | (160, 184)   |
| PIS        | 247 (6.59)          | (245, 250)   |
| Total      | 3752                | (3726, 3779) |
| Female     |                     |              |
| Inpatient  | 3079 (77.60)        | (3058, 3100) |
| Outpatient | 311 (7.83)          | (308, 313)   |
| Care home  | 279 (7.03)          | (265, 292)   |
| PIS        | 263 (6.63)          | (261, 266)   |
| Total      | 3968                | (3940, 3996) |

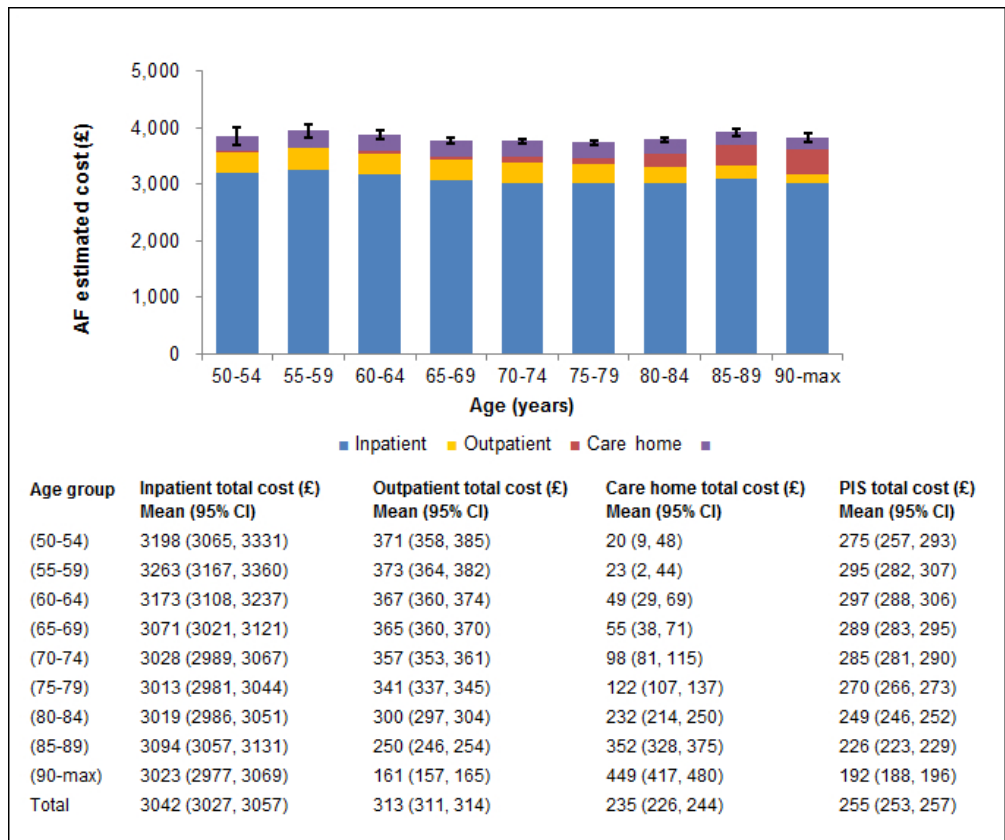

57x48mm (300 x 300 DPI)

1  
2  
3  
4  
5  
6  
7  
8  
9  
10  
11  
12  
13  
14  
15  
16  
17  
18  
19  
20  
21  
22  
23  
24  
25  
26  
27  
28  
29  
30  
31  
32  
33  
34  
35  
36  
37  
38  
39  
40  
41  
42  
43  
44  
45  
46  
47  
48  
49  
50  
51  
52  
53  
54  
55  
56  
57  
58  
59  
60

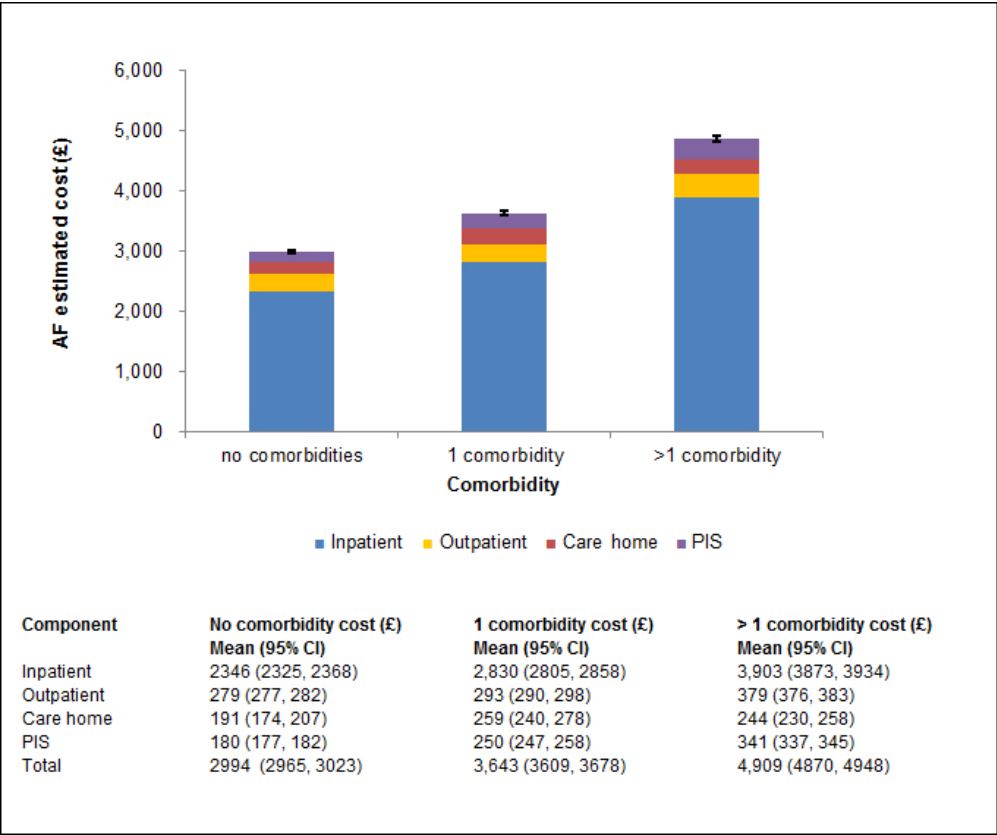

57x48mm (300 x 300 DPI)

## ONLINE SUPPLEMENT

**Equation I. Probability of healthcare utilisation**

$$\Pr(HCE_{it} > 0) = \alpha + \beta_1 \sum_{s=2}^9 A_{it} + \beta_2 G_i + \beta_3 Y_i + \beta_4 \sum_{s=2}^5 S_i + \beta_5 \sum_{u=2}^8 U_i + \beta_6 \sum_{h=2}^{14} H_i$$

$$+ \beta_7 \sum_{c=2}^3 C_{it} + \beta_8 D_i + \left( \beta_9 \sum_{s=2}^5 S_i * D_i \right) + \left( \beta_{10} \sum_{c=2}^3 C_{it} * \sum_{s=2}^9 A_{it} \right) + u_i$$

Where: A is age at the time of admission (reference category: 50 -54 age group); G is sex (reference category: male); Y year of admission; S is SIMD quintile (reference category: most deprived quintile (1)); U is the urban/rural classification (reference category: large urban area); H is health board of inpatient admission (reference category: Greater Glasgow & Clyde); C is the Charlson comorbidity index (reference category: no comorbidities); D is mortality during five year follow-up;  $u_i$  is the error term for patient  $i$  at time  $t$ .

**Equation II. Cost estimation**

$$E[HCE] = g(x\beta)$$

Where  $x\beta$  is the linear predictor for HCE

**Equation III. Multiplying first and second part**

$$E[HCE|X] = \Pr(HCE > 0|X) * E[HCE|HCE > 0, X]$$

**Table I. Regression interactions: probability of healthcare resources utilisation and cost estimation**

| Covariates                                                            | Probability<br>(1 <sup>st</sup> modelling part) |          | Cost Ratios<br>(2 <sup>nd</sup> modelling part) |          |
|-----------------------------------------------------------------------|-------------------------------------------------|----------|-------------------------------------------------|----------|
|                                                                       | Coefficient (95% CI)                            | Std. Err | Coefficient (95% CI)                            | Std. Err |
| <b>Interaction: SIMD - Mortality within 5 years</b>                   |                                                 |          |                                                 |          |
| 1                                                                     | Reference                                       |          |                                                 |          |
| 2                                                                     | -0.023 (-0.079, 0.034)                          | 0.029    | 0.056 (0.026, 0.086)                            | 0.015    |
| 3                                                                     | 0.037 (-0.019, 0.093)                           | 0.029    | 0.064 (0.032, 0.095)                            | 0.016    |
| 4                                                                     | 0.005 (-0.051, 0.062)                           | 0.029    | 0.081 (0.049, 0.112)                            | 0.016    |
| 5                                                                     | 0.041 (-0.018, 0.099)                           | 0.030    | 0.092 (0.060, 0.124)                            | 0.016    |
| <b>Interaction: age (year) - Charlson score (1 comorbidity)</b>       |                                                 |          |                                                 |          |
| 50-54                                                                 | Reference                                       |          |                                                 |          |
| 55-59                                                                 | -0.212 (-0.348, -0.076)                         | 0.069    | -0.065 (-0.159, 0.030)                          | 0.048    |
| 60-64                                                                 | -0.289 (-0.419, -0.158)                         | 0.067    | -0.100 (-0.191, -0.010)                         | 0.046    |
| 65-69                                                                 | -0.329 (-0.454, -0.204)                         | 0.064    | -0.145 (-0.233, -0.057)                         | 0.045    |
| 70-74                                                                 | -0.338 (-0.461, -0.215)                         | 0.063    | -0.186 (-0.272, -0.100)                         | 0.044    |
| 75-79                                                                 | -0.399 (-0.520, -0.277)                         | 0.062    | -0.180 (-0.265, -0.096)                         | 0.043    |
| 80-84                                                                 | -0.421 (-0.543, -0.300)                         | 0.062    | -0.193 (-0.278, -0.107)                         | 0.044    |
| 85-89                                                                 | -0.471 (-0.596, -0.347)                         | 0.064    | -0.199 (-0.287, -0.111)                         | 0.045    |
| 90-max                                                                | -0.536 (-0.667, -0.406)                         | 0.066    | -0.251 (-0.345, -0.158)                         | 0.048    |
| <b>Interaction: age (year) - Charlson score (&gt;1 comorbidities)</b> |                                                 |          |                                                 |          |
| 50-54                                                                 | Reference                                       |          |                                                 |          |
| 55-59                                                                 | -0.121 (-0.304, 0.062)                          | 0.093    | 0.005 (-0.083, 0.093)                           | 0.045    |
| 60-64                                                                 | -0.117 (-0.290, 0.057)                          | 0.088    | -0.109 (-0.191, -0.027)                         | 0.042    |
| 65-69                                                                 | -0.156 (-0.323, 0.011)                          | 0.085    | -0.222 (-0.301, -0.143)                         | 0.040    |
| 70-74                                                                 | -0.234 (-0.398, -0.070)                         | 0.084    | -0.306 (-0.382, -0.229)                         | 0.039    |
| 75-79                                                                 | -0.350 (-0.513, -0.188)                         | 0.083    | -0.342 (-0.417, -0.266)                         | 0.039    |
| 80-84                                                                 | -0.440 (-0.603, -0.278)                         | 0.083    | -0.410 (-0.487, -0.334)                         | 0.039    |
| 85-89                                                                 | -0.550 (-0.715, -0.386)                         | 0.084    | -0.447 (-0.525, -0.369)                         | 0.040    |
| 90-max                                                                | -0.657 (-0.826, -0.488)                         | 0.086    | -0.590 (-0.674, -0.506)                         | 0.043    |

**Equation IV. Probability of healthcare utilisation (alive at the end of the five-year follow-up period)**

$$\Pr(HCE_{it} > 0) = \alpha + \beta_1 \sum_{s=2}^9 A_{it} + \beta_2 G_i + \beta_3 Y_i + \beta_4 \sum_{s=2}^5 S_i + \beta_5 \sum_{u=2}^8 U_i + \beta_6 \sum_{h=2}^{14} H_i + \beta_7 \sum_{c=2}^3 C_{it} + \left( \beta_8 \sum_{c=2}^3 C_{it} * \sum_{s=2}^9 A_{it} \right) + u_i$$

Where: A is age at the time of admission (reference category: 50 -54 age group); G is sex (reference category: male); Y year of admission; S is SIMD quintile (reference category: most deprived quintile (1)); U is the urban/rural classification (reference category: large urban area); H is health board of inpatient admission (reference category: Greater Glasgow & Clyde); C is the Charlson comorbidity index (reference category: no comorbidities);  $u_i$  is the error term for patient  $i$  at time  $t$ .

**Table II. Regression interactions: probability of healthcare resources utilisation and cost estimation (alive at the end of the five-year follow-up period)**

| Covariates               | Probability<br>(1st modelling part) |          | Probability<br>(2nd modelling part) |          |
|--------------------------|-------------------------------------|----------|-------------------------------------|----------|
|                          | Coefficient (95% CI)                | Std. Err | Coefficient (95% CI)                | Std. Err |
| <b>Age group (year)</b>  |                                     |          |                                     |          |
| 50-54                    | Reference                           |          |                                     |          |
| 55-59                    | 0.059 (-0.014, 0.131)               | 0.037    | 0.079 (0.024, 0.134)                | 0.028    |
| 60-64                    | 0.164 (0.095, 0.234)                | 0.035    | 0.149 (0.099, 0.200)                | 0.026    |
| 65-69                    | 0.208 (0.141, 0.275)                | 0.034    | 0.223 (0.173, 0.273)                | 0.025    |
| 70-74                    | 0.241 (0.175, 0.307)                | 0.034    | 0.343 (0.295, 0.391)                | 0.024    |
| 75-79                    | 0.323 (0.257, 0.389)                | 0.034    | 0.415 (0.368, 0.462)                | 0.024    |
| 80-84                    | 0.210 (0.142, 0.277)                | 0.034    | 0.546 (0.497, 0.596)                | 0.025    |
| 85-89                    | 0.133 (0.061, 0.205)                | 0.037    | 0.736 (0.682, 0.790)                | 0.028    |
| 90-max                   | -0.159 (-0.241, -0.077)             | 0.042    | 0.974 (0.908, 1.041)                | 0.034    |
| <b>Sex</b>               |                                     |          |                                     |          |
| Male                     | Reference                           |          |                                     |          |
| Female                   | 0.050 (0.030, 0.070)                | 0.010    | 0.047 (0.034, 0.060)                | 0.007    |
| <b>Date of admission</b> | 0.176 (0.175, 0.178)                | 0.001    | -0.058 (-0.059, -0.057)             | 0.001    |
| <b>SIMD quintile</b>     |                                     |          |                                     |          |
| 1                        | Reference                           |          |                                     |          |
| 2                        | 0.026 (-0.005, 0.056)               | 0.015    | -0.049 (-0.069, -0.029)             | 0.010    |
| 3                        | -0.013 (-0.045, 0.019)              | 0.016    | -0.076 (-0.098, -0.055)             | 0.011    |
| 4                        | -0.035 (-0.068, -0.003)             | 0.017    | -0.109 (-0.131, -0.087)             | 0.011    |
| 5                        | -0.034 (-0.067, -0.002)             | 0.017    | -0.154 (-0.176, -0.133)             | 0.011    |
| <b>Geography</b>         |                                     |          |                                     |          |
| Large urban              | Reference                           |          |                                     |          |
| Other urban              | -0.157 (-0.186, -0.127)             | 0.015    | -0.031 (-0.050, -0.012)             | 0.010    |
| Accessible small towns   | -0.184 (-0.223, -0.145)             | 0.020    | -0.049 (-0.075, -0.023)             | 0.013    |
| Accessible rural         | -0.236 (-0.274, -0.199)             | 0.019    | -0.061 (-0.087, -0.036)             | 0.013    |
| Remote small towns       | -0.160 (-0.220, -0.100)             | 0.031    | -0.013 (-0.056, 0.029)              | 0.021    |
| Remote rural             | -0.333 (-0.386, -0.280)             | 0.027    | -0.066 (-0.104, -0.028)             | 0.019    |
| Very remote small towns  | -0.425 (-0.515, -0.335)             | 0.046    | -0.096 (-0.159, -0.033)             | 0.032    |
| Very remote rural        | -0.391 (-0.461, -0.321)             | 0.036    | -0.084 (-0.136, -0.031)             | 0.027    |
| <b>Health boards</b>     |                                     |          |                                     |          |
| Great Glasgow and Clyde  | Reference                           |          |                                     |          |
| Lothian                  | -0.051 (-0.087, -0.015)             | 0.018    | -0.052 (-0.073, -0.030)             | 0.011    |
| Lanarkshire              | 0.014 (-0.025, 0.053)               | 0.020    | -0.077 (-0.101, -0.053)             | 0.012    |
| Ayrshire and Arran       | -0.396 (-0.438, -0.354)             | 0.021    | -0.063 (-0.092, -0.033)             | 0.015    |
| Grampian                 | 0.032 (-0.011, 0.075)               | 0.022    | -0.052 (-0.078, -0.025)             | 0.013    |
| Tayside                  | -0.455 (-0.495, -0.416)             | 0.020    | -0.096 (-0.123, -0.069)             | 0.014    |
| Fife                     | -0.086 (-0.134, -0.037)             | 0.025    | -0.024 (-0.057, 0.009)              | 0.017    |
| Highland                 | -0.170 (-0.228, -0.112)             | 0.030    | -0.039 (-0.078, 0.000)              | 0.020    |
| Forth Valley             | -0.518 (-0.566, -0.470)             | 0.024    | -0.113 (-0.147, -0.079)             | 0.017    |
| Dumfries and Galloway    | -0.315 (-0.372, -0.258)             | 0.029    | -0.172 (-0.212, -0.132)             | 0.020    |
| Borders                  | -0.535 (-0.595, -0.475)             | 0.031    | -0.108 (-0.154, -0.062)             | 0.023    |
| Western Isles            | -1.175 (-1.278, -1.072)             | 0.053    | 0.144 (0.060, 0.227)                | 0.043    |
| Orkney                   | -0.409 (-0.554, -0.264)             | 0.074    | 0.002 (-0.117, 0.120)               | 0.060    |
| Shetland                 | -0.608 (-0.748, -0.467)             | 0.072    | -0.061 (-0.196, 0.074)              | 0.069    |
| <b>Comorbidity</b>       |                                     |          |                                     |          |
| no comorbidities         | Reference                           |          |                                     |          |
| 1 comorbidity            | 0.534 (0.418, 0.651)                | 0.059    | 0.421 (0.339, 0.503)                | 0.042    |
| >1 comorbidities         | 0.787 (0.619, 0.956)                | 0.086    | 0.912 (0.828, 0.996)                | 0.043    |



**Table III. Regression interactions: probability of healthcare resources utilisation and cost estimation**  
(alive at the end of the five-year follow-up period)

| Covariates                                                            | Probability<br>(1st modelling part) |          | Probability<br>(2nd modelling part) |          |
|-----------------------------------------------------------------------|-------------------------------------|----------|-------------------------------------|----------|
|                                                                       | Coefficient (95% CI)                | Std. Err | Coefficient (95% CI)                | Std. Err |
| <b>Interaction: age (year) - Charlson score (1 comorbidity)</b>       |                                     |          |                                     |          |
| 50-54                                                                 | Reference                           |          |                                     |          |
| 55-59                                                                 | -0.227 (-0.368, -0.086)             | 0.072    | -0.075 (-0.173, 0.024)              | 0.050    |
| 60-64                                                                 | -0.312 (-0.448, -0.177)             | 0.069    | -0.104 (-0.197, -0.010)             | 0.048    |
| 65-69                                                                 | -0.359 (-0.489, -0.229)             | 0.066    | -0.131 (-0.222, -0.040)             | 0.047    |
| 70-74                                                                 | -0.387 (-0.515, -0.259)             | 0.065    | -0.183 (-0.273, -0.094)             | 0.046    |
| 75-79                                                                 | -0.464 (-0.591, -0.337)             | 0.065    | -0.196 (-0.283, -0.108)             | 0.045    |
| 80-84                                                                 | -0.510 (-0.637, -0.382)             | 0.065    | -0.203 (-0.294, -0.112)             | 0.046    |
| 85-89                                                                 | -0.559 (-0.691, -0.426)             | 0.067    | -0.243 (-0.339, -0.147)             | 0.049    |
| 90-max                                                                | -0.657 (-0.800, -0.514)             | 0.073    | -0.270 (-0.383, -0.157)             | 0.058    |
| <b>Interaction: age (year) - Charlson score (&gt;1 comorbidities)</b> |                                     |          |                                     |          |
| 50-54                                                                 | Reference                           |          |                                     |          |
| 55-59                                                                 | -0.123 (-0.320, 0.075)              | 0.101    | -0.014 (-0.117, 0.089)              | 0.053    |
| 60-64                                                                 | -0.145 (-0.334, 0.043)              | 0.096    | -0.118 (-0.214, -0.022)             | 0.049    |
| 65-69                                                                 | -0.202 (-0.383, -0.020)             | 0.093    | -0.227 (-0.320, -0.133)             | 0.048    |
| 70-74                                                                 | -0.336 (-0.514, -0.158)             | 0.091    | -0.344 (-0.434, -0.254)             | 0.046    |
| 75-79                                                                 | -0.444 (-0.621, -0.267)             | 0.090    | -0.428 (-0.517, -0.339)             | 0.045    |
| 80-84                                                                 | -0.563 (-0.740, -0.386)             | 0.090    | -0.481 (-0.573, -0.390)             | 0.047    |
| 85-89                                                                 | -0.700 (-0.880, -0.519)             | 0.092    | -0.549 (-0.645, -0.452)             | 0.049    |
| 90-max                                                                | -0.823 (-1.013, -0.634)             | 0.097    | -0.712 (-0.824, -0.600)             | 0.057    |

**Figure I. Average annual costs per patient hospitalised with AF by sector. Cost components with confidence interval are presented for each age group (alive at the end of the five-year follow-up period)**

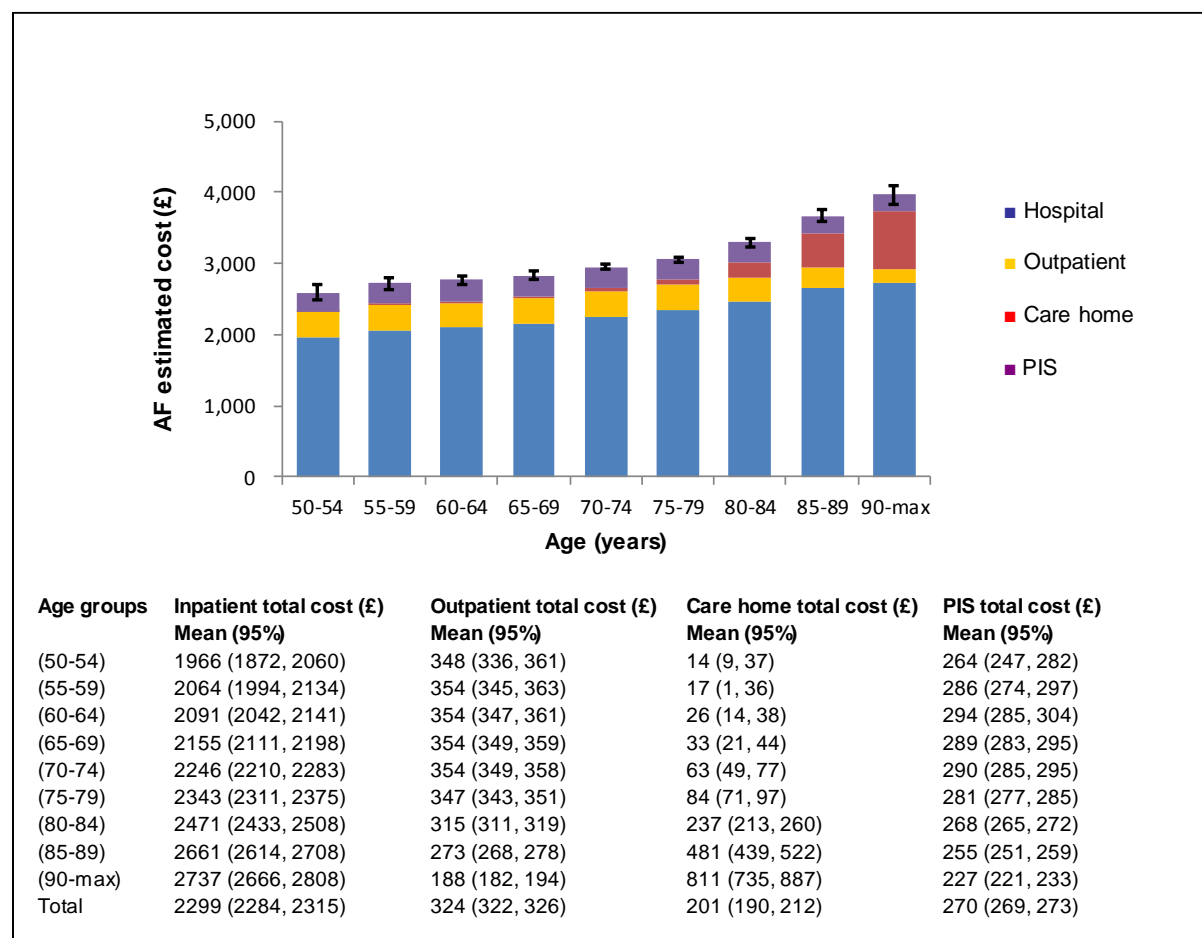

**Equation V. Probability of healthcare utilisation (dead at the end of the five-year follow-up period)**

$$\Pr(HCE_{it} > 0) = \alpha + \beta_1 \sum_{s=2}^9 A_{it} + \beta_2 G_i + \beta_3 Y_i + \beta_4 \sum_{s=2}^5 S_i + \beta_5 \sum_{u=2}^8 U_i + \beta_6 \sum_{h=2}^{14} H_i + \beta_7 \sum_{c=2}^3 C_{it} + \left( \beta_8 \sum_{c=2}^3 C_{it} * \sum_{s=2}^9 A_{it} \right)$$

Where: A is age at the time of admission (reference category: 50 -54 age group); G is sex (reference category: male); Y year of admission; S is SIMD quintile (reference category: most deprived quintile (1)); U is the urban/rural classification (reference category: large urban area); H is health board of inpatient admission (reference category: Greater Glasgow & Clyde); C is the Charlson comorbidity index (reference category: no comorbidities);  $u_i$  is the error term for patient  $i$  at time  $t$ .

Note: the model for care home does not include the 50-54 age group, as none of those patients incurred any cost related to care home.

**Table IV. Regression interactions: probability of healthcare resources utilisation and cost estimation (dead at the end of the five-year follow-up period)**

| Covariates               | Probability<br>(1st modelling part) |          | Probability<br>(2nd modelling part) |          |
|--------------------------|-------------------------------------|----------|-------------------------------------|----------|
|                          | Coefficient (95% CI)                | Std. Err | Coefficient (95% CI)                | Std. Err |
| <b>Age group (year)</b>  |                                     |          |                                     |          |
| 50-54                    | Reference                           |          |                                     |          |
| 55-59                    | 0.013 (-0.229, 0.256)               | 0.124    | 0.153 (-0.119, 0.425)               | 0.139    |
| 60-64                    | 0.008 (-0.207, 0.223)               | 0.110    | 0.246 (0.001, 0.491)                | 0.125    |
| 65-69                    | 0.009 (-0.195, 0.213)               | 0.104    | 0.235 (-0.003, 0.474)               | 0.122    |
| 70-74                    | -0.014 (-0.212, 0.184)              | 0.101    | 0.263 (0.028, 0.497)                | 0.120    |
| 75-79                    | 0.007 (-0.187, 0.201)               | 0.099    | 0.242 (0.009, 0.474)                | 0.119    |
| 80-84                    | 0.011 (-0.182, 0.204)               | 0.098    | 0.302 (0.071, 0.533)                | 0.118    |
| 85-89                    | -0.170 (-0.362, 0.022)              | 0.098    | 0.313 (0.082, 0.543)                | 0.118    |
| 90-max                   | -0.640 (-0.831, -0.448)             | 0.098    | 0.344 (0.112, 0.576)                | 0.118    |
| <b>Sex</b>               |                                     |          |                                     |          |
| Male                     | Reference                           |          |                                     |          |
| Female                   | 0.049 (0.033, 0.064)                | 0.008    | 0.027 (0.013, 0.042)                | 0.007    |
| <b>Date of admission</b> | -0.040 (-0.042, -0.039)             | 0.001    | 0.004 (0.002, 0.005)                | 0.001    |
| <b>SIMD quintile</b>     |                                     |          |                                     |          |
| 1                        | Reference                           |          |                                     |          |
| 2                        | 0.033 (0.011, 0.055)                | 0.011    | 0.015 (-0.005, 0.036)               | 0.011    |
| 3                        | 0.059 (0.034, 0.083)                | 0.012    | -0.007 (-0.030, 0.016)              | 0.012    |
| 4                        | 0.067 (0.041, 0.092)                | 0.013    | -0.017 (-0.042, 0.007)              | 0.013    |
| 5                        | 0.116 (0.090, 0.141)                | 0.013    | -0.026 (-0.050, -0.002)             | 0.012    |
| <b>Geography</b>         |                                     |          |                                     |          |
| Large urban              | Reference                           |          |                                     |          |
| Other urban              | -0.010 (-0.032, 0.012)              | 0.011    | -0.034 (-0.055, -0.013)             | 0.011    |
| Accessible small towns   | -0.004 (-0.034, 0.026)              | 0.015    | -0.051 (-0.080, -0.023)             | 0.014    |
| Accessible rural         | -0.032 (-0.062, -0.002)             | 0.015    | -0.039 (-0.067, -0.011)             | 0.014    |
| Remote small towns       | -0.052 (-0.100, -0.003)             | 0.025    | 0.001 (-0.044, 0.047)               | 0.023    |
| Remote rural             | -0.038 (-0.084, 0.008)              | 0.024    | -0.014 (-0.059, 0.032)              | 0.023    |
| Very remote small towns  | -0.066 (-0.148, 0.017)              | 0.042    | 0.034 (-0.054, 0.122)               | 0.045    |
| Very remote rural        | 0.017 (-0.047, 0.082)               | 0.033    | -0.005 (-0.072, 0.062)              | 0.034    |
| <b>Health boards</b>     |                                     |          |                                     |          |
| Great Glasgow and Clyde  | Reference                           |          |                                     |          |
| Lothian                  | 0.028 (0.003, 0.053)                | 0.013    | 0.030 (0.006, 0.053)                | 0.012    |
| Lanarkshire              | -0.053 (-0.081, -0.025)             | 0.014    | -0.033 (-0.059, -0.006)             | 0.014    |
| Ayrshire and Arran       | -0.125 (-0.158, -0.092)             | 0.017    | 0.013 (-0.018, 0.045)               | 0.016    |
| Grampian                 | 0.075 (0.044, 0.106)                | 0.016    | -0.058 (-0.087, -0.028)             | 0.015    |
| Tayside                  | -0.025 (-0.057, 0.006)              | 0.016    | -0.059 (-0.088, -0.031)             | 0.014    |
| Fife                     | -0.026 (-0.062, 0.011)              | 0.018    | 0.045 (0.010, 0.080)                | 0.018    |
| Highland                 | 0.032 (-0.018, 0.081)               | 0.025    | -0.062 (-0.115, -0.010)             | 0.027    |
| Forth Valley             | -0.060 (-0.099, -0.020)             | 0.020    | -0.125 (-0.163, -0.087)             | 0.019    |
| Dumfries and Galloway    | -0.027 (-0.074, 0.020)              | 0.024    | -0.014 (-0.058, 0.029)              | 0.022    |
| Borders                  | -0.058 (-0.112, -0.005)             | 0.027    | -0.022 (-0.073, 0.030)              | 0.026    |
| Western Isles            | -0.036 (-1.170, 1.098)              | 0.579    | 0.308 (-0.163, 0.778)               | 0.240    |
| Orkney                   | 0.188 (0.052, 0.324)                | 0.069    | -0.177 (-0.315, -0.039)             | 0.070    |
| Shetland                 | -0.040 (-0.181, 0.100)              | 0.072    | -0.183 (-0.321, -0.046)             | 0.070    |
| <b>Comorbidity</b>       |                                     |          |                                     |          |
| no comorbidities         | Reference                           |          |                                     |          |
| 1 comorbidity            | -0.169 (-0.442, 0.105)              | 0.140    | 0.288 (-0.003, 0.579)               | 0.148    |
| >1 comorbidities         | -0.208 (-0.434, 0.018)              | 0.115    | 0.788 (0.535, 1.041)                | 0.129    |

**Table V. Regression interactions: probability of healthcare resources utilisation and cost estimation (dead at the end of the five-year follow-up period)**

| Covariates                                                            | Probability<br>(1st modelling part) |          | Probability<br>(2nd modelling part) |          |
|-----------------------------------------------------------------------|-------------------------------------|----------|-------------------------------------|----------|
|                                                                       | Coefficient (95% CI)                | Std. Err | Coefficient (95% CI)                | Std. Err |
| <b>Interaction: age (year) - Charlson score (1 comorbidity)</b>       |                                     |          |                                     |          |
| 50-54                                                                 | Reference                           |          |                                     |          |
| 55-59                                                                 | 0.123 (-0.221, 0.467)               | 0.175    | -0.087 (-0.434, 0.260)              | 0.177    |
| 60-64                                                                 | 0.076 (-0.232, 0.383)               | 0.157    | -0.149 (-0.465, 0.166)              | 0.161    |
| 65-69                                                                 | 0.021 (-0.271, 0.313)               | 0.149    | -0.195 (-0.498, 0.109)              | 0.155    |
| 70-74                                                                 | -0.014 (-0.299, 0.272)              | 0.145    | -0.192 (-0.490, 0.107)              | 0.152    |
| 75-79                                                                 | -0.086 (-0.366, 0.195)              | 0.143    | -0.139 (-0.434, 0.157)              | 0.151    |
| 80-84                                                                 | -0.207 (-0.486, 0.072)              | 0.142    | -0.188 (-0.482, 0.106)              | 0.150    |
| 85-89                                                                 | -0.167 (-0.445, 0.111)              | 0.142    | -0.179 (-0.473, 0.114)              | 0.150    |
| 90-max                                                                | -0.162 (-0.440, 0.116)              | 0.142    | -0.220 (-0.515, 0.075)              | 0.151    |
| <b>Interaction: age (year) - Charlson score (&gt;1 comorbidities)</b> |                                     |          |                                     |          |
| 50-54                                                                 | Reference                           |          |                                     |          |
| 55-59                                                                 | -0.195 (-0.482, 0.092)              | 0.147    | -0.121 (-0.423, 0.182)              | 0.154    |
| 60-64                                                                 | -0.183 (-0.438, 0.073)              | 0.130    | -0.276 (-0.548, -0.004)             | 0.139    |
| 65-69                                                                 | -0.263 (-0.506, -0.021)             | 0.124    | -0.327 (-0.591, -0.062)             | 0.135    |
| 70-74                                                                 | -0.239 (-0.476, -0.003)             | 0.121    | -0.399 (-0.659, -0.139)             | 0.133    |
| 75-79                                                                 | -0.359 (-0.592, -0.126)             | 0.119    | -0.410 (-0.668, -0.153)             | 0.131    |
| 80-84                                                                 | -0.491 (-0.722, -0.260)             | 0.118    | -0.529 (-0.785, -0.273)             | 0.131    |
| 85-89                                                                 | -0.441 (-0.672, -0.210)             | 0.118    | -0.557 (-0.813, -0.301)             | 0.131    |
| 90-max                                                                | -0.360 (-0.590, -0.129)             | 0.118    | -0.645 (-0.902, -0.388)             | 0.131    |

**Figure II. Average annual costs per patient hospitalised with AF by sector. Cost components with confidence interval are presented for each age group (dead at the end of the five-year follow-up period)**

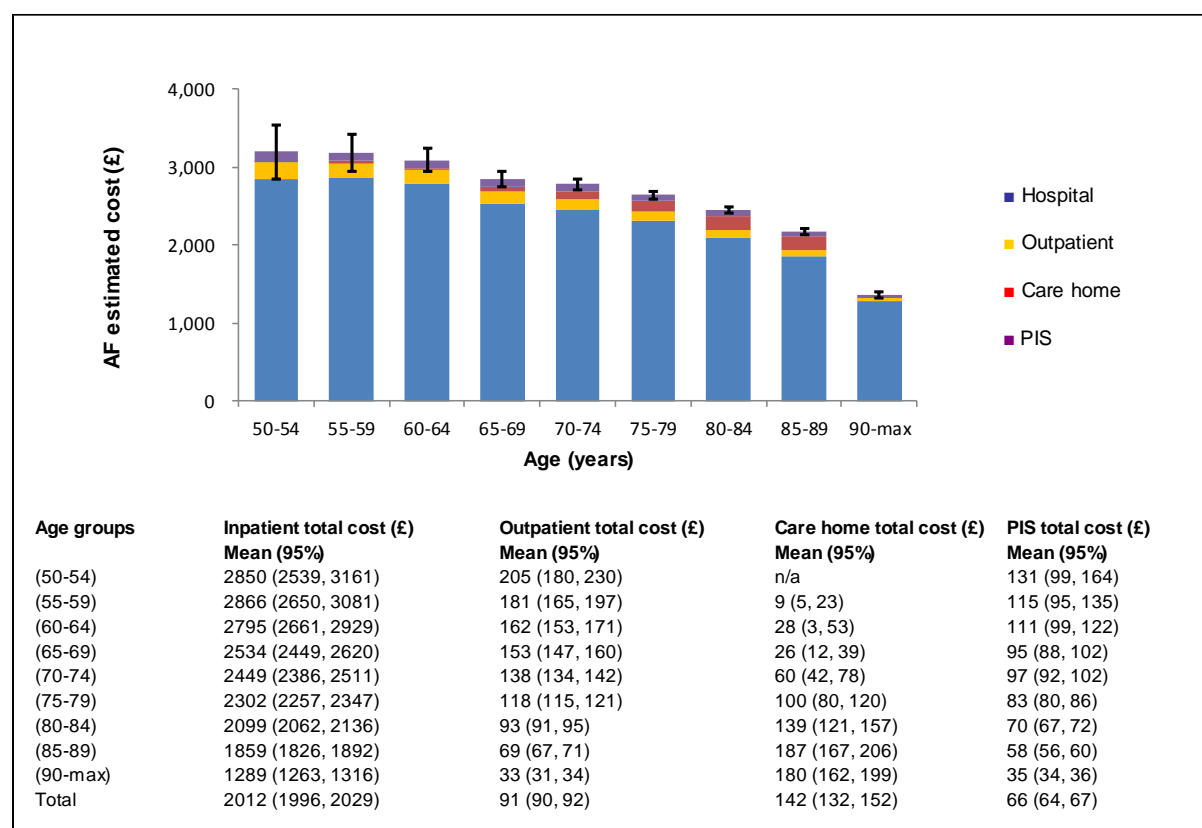

Note: the care home total cost estimation does not include the 50-54 age group, as none of those patients incurred any cost related to care home.

**STROBE 2007 (v4) Statement—Checklist of items that should be included in reports of *cohort studies***

| Section/Topic                | Item # | Recommendation                                                                                                                                                                       | Reported on page # |
|------------------------------|--------|--------------------------------------------------------------------------------------------------------------------------------------------------------------------------------------|--------------------|
| <b>Title and abstract</b>    | 1      | (a) Indicate the study's design with a commonly used term in the title or the abstract                                                                                               | 1                  |
|                              |        | (b) Provide in the abstract an informative and balanced summary of what was done and what was found                                                                                  | 1                  |
| <b>Introduction</b>          |        |                                                                                                                                                                                      |                    |
| Background/rationale         | 2      | Explain the scientific background and rationale for the investigation being reported                                                                                                 | 3                  |
| Objectives                   | 3      | State specific objectives, including any prespecified hypotheses                                                                                                                     | 3                  |
| <b>Methods</b>               |        |                                                                                                                                                                                      |                    |
| Study design                 | 4      | Present key elements of study design early in the paper                                                                                                                              | 4                  |
| Setting                      | 5      | Describe the setting, locations, and relevant dates, including periods of recruitment, exposure, follow-up, and data collection                                                      | 4                  |
| Participants                 | 6      | (a) Give the eligibility criteria, and the sources and methods of selection of participants. Describe methods of follow-up                                                           | 4                  |
|                              |        | (b) For matched studies, give matching criteria and number of exposed and unexposed                                                                                                  | n/a                |
| Variables                    | 7      | Clearly define all outcomes, exposures, predictors, potential confounders, and effect modifiers. Give diagnostic criteria, if applicable                                             | 7-8                |
| Data sources/<br>measurement | 8*     | For each variable of interest, give sources of data and details of methods of assessment (measurement). Describe comparability of assessment methods if there is more than one group | n/a                |
| Bias                         | 9      | Describe any efforts to address potential sources of bias                                                                                                                            | 7                  |
| Study size                   | 10     | Explain how the study size was arrived at                                                                                                                                            | 4                  |
| Quantitative variables       | 11     | Explain how quantitative variables were handled in the analyses. If applicable, describe which groupings were chosen and why                                                         | 7-8                |
| Statistical methods          | 12     | (a) Describe all statistical methods, including those used to control for confounding                                                                                                | 6-8                |
|                              |        | (b) Describe any methods used to examine subgroups and interactions                                                                                                                  | 6-7                |
|                              |        | (c) Explain how missing data were addressed                                                                                                                                          | n/a                |
|                              |        | (d) If applicable, explain how loss to follow-up was addressed                                                                                                                       | n/a                |
|                              |        | (e) Describe any sensitivity analyses                                                                                                                                                | n/a                |
| <b>Results</b>               |        |                                                                                                                                                                                      |                    |

|                          |     |                                                                                                                                                                                                                                                                                                                                                                                                               |                    |
|--------------------------|-----|---------------------------------------------------------------------------------------------------------------------------------------------------------------------------------------------------------------------------------------------------------------------------------------------------------------------------------------------------------------------------------------------------------------|--------------------|
| Participants             | 13* | (a) Report numbers of individuals at each stage of study—eg numbers potentially eligible, examined for eligibility, confirmed eligible, included in the study, completing follow-up, and analysed<br>(b) Give reasons for non-participation at each stage<br>(c) Consider use of a flow diagram                                                                                                               | n/a                |
| Descriptive data         | 14* | (a) Give characteristics of study participants (eg demographic, clinical, social) and information on exposures and potential confounders<br>(b) Indicate number of participants with missing data for each variable of interest<br>(c) Summarise follow-up time (eg, average and total amount)                                                                                                                | n/a                |
| Outcome data             | 15* | Report numbers of outcome events or summary measures over time                                                                                                                                                                                                                                                                                                                                                | n/a                |
| Main results             | 16  | (a) Give unadjusted estimates and, if applicable, confounder-adjusted estimates and their precision (eg, 95% confidence interval). Make clear which confounders were adjusted for and why they were included<br>(b) Report category boundaries when continuous variables were categorized<br>(c) If relevant, consider translating estimates of relative risk into absolute risk for a meaningful time period | 9-11<br>n/a<br>n/a |
| Other analyses           | 17  | Report other analyses done—eg analyses of subgroups and interactions, and sensitivity analyses                                                                                                                                                                                                                                                                                                                | 9                  |
| <b>Discussion</b>        |     |                                                                                                                                                                                                                                                                                                                                                                                                               |                    |
| Key results              | 18  | Summarise key results with reference to study objectives                                                                                                                                                                                                                                                                                                                                                      | 11                 |
| <b>Limitations</b>       |     |                                                                                                                                                                                                                                                                                                                                                                                                               |                    |
| Interpretation           | 20  | Give a cautious overall interpretation of results considering objectives, limitations, multiplicity of analyses, results from similar studies, and other relevant evidence                                                                                                                                                                                                                                    | 12-14              |
| Generalisability         | 21  | Discuss the generalisability (external validity) of the study results                                                                                                                                                                                                                                                                                                                                         | 14                 |
| <b>Other information</b> |     |                                                                                                                                                                                                                                                                                                                                                                                                               |                    |
| Funding                  | 22  | Give the source of funding and the role of the funders for the present study and, if applicable, for the original study on which the present article is based                                                                                                                                                                                                                                                 | 15                 |

\*Give information separately for cases and controls in case-control studies and, if applicable, for exposed and unexposed groups in cohort and cross-sectional studies.

**Note:** An Explanation and Elaboration article discusses each checklist item and gives methodological background and published examples of transparent reporting. The STROBE checklist is best used in conjunction with this article (freely available on the Web sites of PLoS Medicine at <http://www.plosmedicine.org/>, Annals of Internal Medicine at <http://www.annals.org/>, and Epidemiology at <http://www.epidem.com/>). Information on the STROBE Initiative is available at [www.strobe-statement.org](http://www.strobe-statement.org).



# BMJ Open

## Inpatient, Outpatient, Prescribing and Care Home Costs associated with Atrial Fibrillation

|                                 |                                                                                                                                                                                                                                                                                                                                               |
|---------------------------------|-----------------------------------------------------------------------------------------------------------------------------------------------------------------------------------------------------------------------------------------------------------------------------------------------------------------------------------------------|
| Journal:                        | <i>BMJ Open</i>                                                                                                                                                                                                                                                                                                                               |
| Manuscript ID                   | bmjopen-2018-028575.R2                                                                                                                                                                                                                                                                                                                        |
| Article Type:                   | Original research                                                                                                                                                                                                                                                                                                                             |
| Date Submitted by the Author:   | 15-Oct-2019                                                                                                                                                                                                                                                                                                                                   |
| Complete List of Authors:       | Ciminata, Giorgio; University of Glasgow Institute of Health and Wellbeing, Health Economics and Health Technology Assessment (HEHTA)<br>Geue, Claudia; University of Glasgow, Institute of Health and Wellbeing<br>Langhorne, Peter; University of Glasgow, Institute of Cardiovascular and Medical Sciences<br>Wu, O; University of Glasgow |
| <b>Primary Subject Heading</b>: | Health economics                                                                                                                                                                                                                                                                                                                              |
| Secondary Subject Heading:      | Cardiovascular medicine                                                                                                                                                                                                                                                                                                                       |
| Keywords:                       | HEALTH ECONOMICS, Atrial Fibrillation, Stroke < NEUROLOGY, Cost Analysis                                                                                                                                                                                                                                                                      |
|                                 |                                                                                                                                                                                                                                                                                                                                               |

SCHOLARONE™  
Manuscripts



I, the Submitting Author has the right to grant and does grant on behalf of all authors of the Work (as defined in the below author licence), an exclusive licence and/or a non-exclusive licence for contributions from authors who are: i) UK Crown employees; ii) where BMJ has agreed a CC-BY licence shall apply, and/or iii) in accordance with the terms applicable for US Federal Government officers or employees acting as part of their official duties; on a worldwide, perpetual, irrevocable, royalty-free basis to BMJ Publishing Group Ltd ("BMJ") its licensees and where the relevant Journal is co-owned by BMJ to the co-owners of the Journal, to publish the Work in this journal and any other BMJ products and to exploit all rights, as set out in our [licence](#).

The Submitting Author accepts and understands that any supply made under these terms is made by BMJ to the Submitting Author unless you are acting as an employee on behalf of your employer or a postgraduate student of an affiliated institution which is paying any applicable article publishing charge ("APC") for Open Access articles. Where the Submitting Author wishes to make the Work available on an Open Access basis (and intends to pay the relevant APC), the terms of reuse of such Open Access shall be governed by a Creative Commons licence – details of these licences and which [Creative Commons](#) licence will apply to this Work are set out in our licence referred to above.

Other than as permitted in any relevant BMJ Author's Self Archiving Policies, I confirm this Work has not been accepted for publication elsewhere, is not being considered for publication elsewhere and does not duplicate material already published. I confirm all authors consent to publication of this Work and authorise the granting of this licence.

## Inpatient, Outpatient, Prescribing and Care Home Costs associated with Atrial Fibrillation

**Authors:** Ciminata G (Research Assistant)<sup>1</sup>, Geue C (Lecturer in Health Economics)<sup>1</sup>, Langhorne P (Professor of Stroke Care)<sup>2</sup>, Wu O (Professor of Health Technology Assessment)<sup>1</sup>.

1. Health Economics and Health Technology Assessment (HEHTA), Institute of Health & Wellbeing, University of Glasgow, Glasgow G12 8RZ, UK
2. Institute of Cardiovascular & Medical Sciences, University of Glasgow, Glasgow G31 2ER, UK

Corresponding author:

Mr Giorgio Ciminata (MSc), [g.ciminata.1@research.gla.ac.uk](mailto:g.ciminata.1@research.gla.ac.uk)

Cover title: Inpatient, Outpatient, Prescribing and Care Home Costs associated with Atrial Fibrillation

Total number of tables and figures: Figures: 2, Tables: 5

Subject terms: Atrial Fibrillation

Key words: Atrial Fibrillation, Stroke, cost analysis

Word count: 3753

## Abstract

**Objective:** To estimate global inpatient, outpatient, prescribing and care-home costs for atrial fibrillation (AF) patients, using population-based, individual-level linked data.

**Design:** A two-part model was employed to estimate the probability of resource utilisation and costs conditional on positive utilisation using individual-level linked data.

**Settings:** Scotland, five years following first hospitalisation for AF between 1997 and 2015.

**Participants:** Patients hospitalised with a known diagnosis of AF or atrial flutter.

**Primary and secondary outcome measures:** Inpatient, outpatient, prescribing and care home costs.

**Results:** The mean annual cost for an AF patient was estimated at £3785 (95% CI £3767-£3804). Inpatient admissions and outpatient visits accounted for 79% and 8% of total costs, respectively; prescriptions and care home stay accounted for 7% and 6% of total costs. Inpatient cost was the main driver across all age groups. While inpatient cost contributions (~80%) were constant between 0 and 84 years, they decreased for patients over 85 years. This is offset by increasing care-home cost contributions. Mean annual costs associated with AF increased significantly with increasing number of comorbidities.

**Conclusion:** This study used a contemporary and representative cohort, and a comprehensive approach to estimate global costs associated with AF, taking into account resource utilisation beyond hospital care. While overall costs, considerably affected by comorbidity, did not increase with increasing age, care-home costs increased proportionally with age. Inpatient admission was the main contributor to the overall financial burden of AF, highlighting the need for improved mechanisms of early diagnosis to prevent hospitalisations.

## Article summary

### Strengths and limitations of this study

- Costs are estimated through an incidence-based approach using patient-level morbidity records.
- Sufficient follow-up time is used to capture all relevant global costs to generate a contemporary estimate of health and care home costs related to AF.
- Scotland offers a robust record linkage system, where administrative patient-level health data are routinely collected.
- Data on primary care consultations were not available for linkage at a national level, however the impact this might have on overall costs is expected to be small.
- The potential risk of AF going undiagnosed and clinical miscoding of morbidity records may lead to an underestimation of the AF cohort and associated costs.

## Introduction

Atrial Fibrillation (AF) is the most common form of arrhythmia. In Scotland AF affects 1.8% of the adult population, and rises to 6% among those aged 65 years or over [1]. In an ageing population, AF has a substantial impact on the economic burden of the healthcare system.

A number of cost analyses on estimating the economic burden of AF exist. The majority of these studies used various definition of the AF study population, based on data sourced from administrative database [2-4], health insurance databases [2, 5-7], hospital records [8, 9] and surveys [10]. Direct medical costs related to inpatient admissions, outpatient visits, as well as prescriptions have been included in these estimates; [2-10] indirect costs related to loss of productivity have been estimated among patients who were at working ages [6, 7].

There is a lack of generalisable studies based on large national population datasets that examine the total and the distribution of costs associated with AF [11]. The aim of this study was to quantify the inpatient, outpatient, prescribing and care home costs associated with AF over a five-year period. Using record-linkage of national datasets from Scotland, we also examined the distribution of costs that are attributable to AF.

## Methods

Cost analyses or cost of illness studies typically adopt either the prevalence or incidence based approaches [12]. In the context of AF, the prevalence-based approach determines costs attributable to all cases of AF in a given year, while the incidence-based approach determines costs of new cases of AF in a given time period. In the present study, costs were estimated with an incidence-based approach. A further distinction between costing analyses is between the medicalized and the global comprehensive approaches.

1  
2  
3 In the first case, only expenditures directly attributable to a particular disease are used for  
4  
5 estimating the overall costs. While the medicalized approach can be used to identify highly  
6  
7 specific expenditures, it may also lead to underestimation or overestimation of the economic  
8  
9 burden of a given disease; this may happen when cost estimation is not adequately adjusted for  
10  
11 confounders highly correlated with the disease of interest. Conversely, the global  
12  
13 comprehensive approach, used in this analysis, includes all the expenditures incurred by a  
14  
15 population with a particular disease [13]. These expenditures are not necessarily related to the  
16  
17 disease of interest; for instance, expenditures related to orthopaedics surgery or cancer  
18  
19 treatment incurred by a patient with AF, will count towards the global comprehensive cost of  
20  
21 AF.  
22  
23  
24  
25  
26  
27

## 28 **Data**

29  
30 Data were obtained from the Information Services Division (ISD) of NHS Scotland as part of  
31  
32 a wider project that used routinely collected data to evaluate clinical effectiveness and cost-  
33  
34 effectiveness of Direct Oral Anticoagulants (DOACs) in the prevention of stroke in the AF  
35  
36 population. Inpatient records for patients with a diagnosis of AF or atrial flutter between 1997  
37  
38 and 2015 were extracted from the General Acute Inpatient and Day Case Scottish Morbidity  
39  
40 Records 01 (SMR01). These records contain all general acute admissions, categorized as  
41  
42 inpatients or day cases, discharged from non-obstetric and non-psychiatric specialties [14].  
43  
44 Incident AF events (ICD10 code I48) were identified using all six diagnostic positions in  
45  
46 SMR01, with a look back period of five years to minimise double counting. After checking for  
47  
48 data entry errors and removal of duplicate records, the final AF cohort consisting of 278,286  
49  
50 individuals hospitalised with a diagnosis of AF or atrial flutter was identified.  
51  
52  
53  
54  
55  
56  
57  
58  
59  
60

1  
2  
3 Individual-level data linkage was then carried out with outpatient clinic attendance (Outpatient  
4 Attendance Scottish Morbidity Records 00; SMR00), the prescribing information system (PIS),  
5  
6 care home census and mortality records (National Records for Scotland, NRS). Records from  
7  
8 SMR00 include information on new and follow up outpatient appointments for any clinical  
9  
10 specialty [15]. The PIS database includes prescribing records for all medicines and their  
11  
12 associated costs, which are prescribed and dispensed by community pharmacies, dispensing  
13  
14 doctors and a small number of specialist appliance suppliers [16]. The quality of PIS data is  
15  
16 guaranteed by an electronic data capture, and it passes several stages of quality control before  
17  
18 and after data are submitted [17]. The care home census combines the former Residential Care  
19  
20 Home Census (run by the Scottish Government) and the Private Nursing Homes Census (run  
21  
22 by ISD Scotland). Items reported in the care home census include discharge dates to care home  
23  
24 residency such as NHS and private nursing homes, as well as an indication on whether nursing  
25  
26 care is required [16].  
27  
28  
29  
30  
31  
32  
33  
34

35 Patients were followed up for five years following incident AF event in terms of their  
36  
37 healthcare resource use, care home admissions and mortality. Since AF is often a precursor of  
38  
39 stroke and cardiovascular conditions, an estimation of costs for a period of five years post AF  
40  
41 event would allow us to fully capture costs associated with an AF patient.  
42  
43  
44  
45  
46

### 47 **Costing**

48  
49 Inpatient care costs were obtained from the latest (2013/2014) Scottish National Tariff (SNT),  
50  
51 a list of standard average prices based on Healthcare Resource Groups (HRGs) [17, 18]. The  
52  
53 SNT uses HRG4 for grouping clinically similar treatments that use similar levels of healthcare  
54  
55 resources. After defining a total cost per episode, the total cost for a continuous inpatient stay  
56  
57 (CIS) was calculated.  
58  
59  
60



1  
2  
3 A CIS describes the entire duration of an inpatient stay from the date of admission to the date  
4 of discharge and can consist of several episodes in different specialties. Since the SNT is based  
5 on spells of care (inpatient stay within the same specialty) rather than individual inpatient  
6 episodes or a CIS, a CIS was partitioned into spells when a change in specialty occurred [17].  
7  
8 If within a CIS, two or more episodes were in the same specialty, only the highest incurred cost  
9 was taken into account, and the remaining episodes were replaced with a zero cost. Outpatient  
10 costs were obtained by assigning outpatient specialty costs, to outpatient attendances [17]. Unit  
11 costs were specific to whether the outpatient attendance took place at a consultant or nurse led  
12 clinic [15].  
13  
14  
15  
16  
17  
18  
19  
20  
21  
22  
23  
24  
25

26 The cost of each prescription dispensed per patient was obtained from PIS [19]. Firstly, the  
27 price per unit was obtained by dividing the item price by the pack size. Secondly, the total  
28 number of items dispensed was obtained by multiplying the number of items dispensed by the  
29 number of instalments. Care home costs, obtained from the care home census, were based on  
30 length of stay or residency. Care home residency was established from care home census  
31 records, reporting admission to a care home like structure [16]. An average of care home  
32 charges for long stay residents was calculated using information on whether nursing care was  
33 provided or not. The average weekly care home charge was expressed per day, so that only the  
34 effective days spent in a care home were costed. The tariffs used for costing account for  
35 inflation, therefore further cost adjustment was not needed.  
36  
37  
38  
39  
40  
41  
42  
43  
44  
45  
46  
47  
48  
49  
50

### 51 **Econometric model**

52 Healthcare expenditure data are typically characterised by: i) a significant proportion of zero-  
53 cost observations for individuals who have not utilised any healthcare resources in a given time  
54 period, and ii) a skewed distribution for positive costs. A two-part model was used [20, 21].  
55  
56  
57  
58  
59  
60

1  
2  
3 In the first part of the model, the probability of using a healthcare service in a given time period  
4 was estimated using a probit model (Equation I, please see online supplement). The same  
5 explanatory variables were used in the second part of the model, with a gamma distribution  
6 and log link, estimating costs conditional on having incurred positive costs (Equation II, please  
7 see online supplement). Mean costs per patient per year following their incident AF event were  
8 calculated by multiplying first and second modelling part (Equation III, please see online  
9 supplement).

10  
11  
12 In order to account for the skewed nature of cost data, generalised linear models (GLMs) were  
13 used. These were compared against ordinary least squares regression (OLS) and log  
14 transformed OLS by means of the Akaike Information Criterion (AIC), which measures  
15 goodness of fit. When comparing the different models, GLM reported the lowest AIC  
16 indicating the best fit for the given set of data. A user-written STATA programme  
17 “glmldiagnostic.do” [20], performing four different tests simultaneously, was used to identify  
18 the most appropriate distributional family and link function.

### 19 20 21 **Econometric model covariates**

22 The two-part model adjusted for age, sex, year of inpatient admission, socio-economic status,  
23 urban-rural classification, health board, comorbidities and mortality. These covariates are  
24 considered to be the main confounders that have an effect on costs incurred by an AF  
25 population. We controlled for age because AF and associated comorbidities are age-related  
26 conditions, and may have an impact on the overall costs. We also assumed costs to vary  
27 between males and females, in particular those for care home residency. Variation in healthcare  
28 utilisation and associated costs and care home residency by socio-economic status is controlled  
29 for using the Scottish Index of Multiple Deprivation (SIMD).

1  
2  
3 The SIMD reflects areas of multiple deprivation ranked from the most to the least deprived and  
4 expressed as quintiles where the most and the least deprived areas are represented by 1 and 5  
5  
6 respectively [22]. In Scotland, there are 14 regional health boards responsible for the provision  
7  
8 of healthcare [23]. Hence, potential differences in healthcare utilisation and prescribing costs,  
9  
10 may reflect variation in clinical practice and prescribing behaviour rather than the ability of  
11  
12 patients to access care. Patients living in urban areas may have easier access to care compared  
13  
14 to patients living in more remote areas, which is controlled for including the 8-fold  
15  
16 classification measuring rurality [24].  
17  
18  
19  
20  
21  
22  
23

24 Patients with one or more comorbidities are expected to incur significantly higher costs than  
25 those with none. We accounted for this by including the Charlson comorbidity index, where 1  
26 indicates the absence of comorbidities, 2 the presence of only a single comorbidity and 3 the  
27 presence of more than one comorbidity [25]. Two interaction terms between age and  
28 comorbidities, and mortality and SIMD were included in the econometric model. Intuitively, a  
29 relationship of direct proportionality between age and comorbidities suggests that the level of  
30 comorbidities increases, as patients get older. Similarly, the socio-economic status may  
31 significantly influence the rate of socio-economic inequalities in mortality [26].  
32  
33  
34  
35  
36  
37  
38  
39  
40  
41  
42  
43  
44  
45

### 46 **Sensitivity analyses**

47  
48 In order to ascertain whether mortality had an impact on overall AF related healthcare costs,  
49 average annual cost per patient by age and for each health or care home sector, was estimated  
50 for patients who were alive and those who were dead at the end of the five-year follow-up  
51 period. The two econometric models (Equation IV and V, please see online TABLEent)  
52 followed the same structure of the model described in the previous section and used for the  
53 main analysis; however, those models were not adjusted for mortality.  
54  
55  
56  
57  
58  
59  
60

### Ethics statement

The authors state that no ethical approval was needed.

### Patients and public involvement

There was no patients or public involvement

## Results

### Cohort characteristics

Of the 278,286 AF patients with a mean age of 74 years (SD 12.5), the majority were identified in the two largest urban health board areas (Greater Glasgow & Clyde and Lothian), accounting for 22.2% and 14.8% respectively. This is also reflected in our categorisation of geographical areas, where large urban represented 38.4% and other urban areas represented 29.7% of the total AF cohort. Greater proportion of patients live in areas belonging to the most deprived quintile compared with those living in the least deprived areas – SIMD quintile 1 and quintile 5 representing 22.5% and 16.6% of the AF cohort respectively (Table1).

### Econometric modelling results

Regression results for both modelling parts are presented in Table 2. Overall, an inversely U-shaped association between age and the likelihood of utilising any health or social care services was observed – a gradual increment in the likelihood in resource use with advancing age up to 80 years, when compared with the reference group (0-49 years), while patients 80 years or older showing a decreased probability of utilising healthcare services. However, this association was not observed in the second modelling part model, estimating costs conditional on having incurred positive costs, where a statistically significant gradient between age and costs indicated increasing costs as the cohort ages.

1  
2  
3 The use of health or social care services and associated costs also increased significantly for  
4 patients living in the most deprived areas, when compared with patients living in areas with the  
5 lowest level of deprivation. The effect of socio-economic status on healthcare utilisation was  
6 also measured for those who are alive at the end of the five-year follow-up period through an  
7 interaction term between SIMD and mortality, but no statistically significant effect was found.  
8 Full details of regression results for interaction terms are presented in the supplementary online  
9 material (Table I, please see online supplement).

10  
11  
12 For patients with comorbidities, the probabilities of utilising healthcare services were greater  
13 than the probability for those with no comorbidities. Although healthcare utilisation increased  
14 with the number of comorbidities, the interaction term between age and comorbidities indicated  
15 that as patients get older the use of healthcare services on average is lower for patients with  
16 one or more comorbidities than those with none. The decrease in healthcare utilisation by age  
17 is more pronounced in patients with more comorbidities than in those with only one  
18 comorbidity. The difference in healthcare costs between comorbidity categories indicated that  
19 in the presence of one or more comorbidities, on average healthcare costs decrease as patients  
20 get older. Full details of regression results for patients who were alive and those who were dead  
21 at the end of the five-year follow-up period are presented in Table 3 and Table 4 respectively,  
22 while regression results for interaction terms are presented in the supplementary online material  
23 (Table II and Table III, please see online supplement).

### 53 **Cost estimates**

54 The estimated mean annual cost per AF patient was £3785 (95% CI: £3767-£3804). The  
55 estimated total costs and distribution of costs according to sex are shown in Table 5.  
56  
57  
58  
59  
60

1  
2  
3 While there is little difference between the total costs and the distribution of costs for inpatient,  
4 outpatient and prescription costs, the difference seems more pronounced when comparing the  
5 care home component of costs (5% of total costs among males vs 7% of total costs among  
6 females).  
7  
8  
9  
10  
11  
12  
13

14  
15 The average annual cost per AF patient by age and for each health or care home sector is shown  
16 in Figure 1. Considering the individual contribution of each cost component to the overall costs,  
17 inpatient costs was the main driver across all age groups. While inpatient cost contribution  
18 remained constant with an average contribution of about 80% to the overall costs for patients  
19 aged between 0 and 84 years, it decreased for patients over 85 years of age. Similar patterns  
20 were observed for outpatient and prescribing costs. On the contrary, the contribution of care  
21 home costs to the overall costs increased with age (0.5% for patients aged 0-49 years and  
22 approximately 11% for patients who are 90 years or older). The contribution of each setting to  
23 the total health and care home costs by the number of existing comorbidities is illustrated in  
24 Figure 2. While inpatient and total costs vary considerably with the number of comorbidities,  
25 outpatient and care home contributions remain fairly constant.  
26  
27  
28  
29  
30  
31  
32  
33  
34  
35  
36  
37  
38  
39  
40  
41

42 The estimated mean annual cost per AF patient alive at the end of the five-year follow-up  
43 period was £3047 (95% CI: £3027-£3067). The average annual cost per AF patient by age and  
44 for each health or care home sector is presented in the supplementary online material (Figure  
45 I, please see online supplement). For these patients, inpatient cost was the main driver across  
46 all age groups; a gradient between age and costs indicated increasing costs as the cohort ages.  
47 Similar patterns were observed for care home costs. On the contrary, outpatient and prescribing  
48 costs remained constant up to 74 years, but decreased slightly for older patients.  
49  
50  
51  
52  
53  
54  
55  
56  
57  
58  
59  
60

1  
2  
3 The estimated mean annual cost per AF patient who died during the five-year follow-up period,  
4 was £2304 (95% CI: £2284-£2324) (Figure II, please see online supplement). For these  
5  
6 patients, inpatient cost was the main driver across all age groups; a gradient between age and  
7  
8 costs indicated decreasing costs as the cohort ages. This was also observed for outpatient and  
9  
10 prescribing costs; but care home costs on average increased across age groups.  
11  
12  
13  
14  
15  
16

## 17 **Discussion**

18  
19 A greater proportion of AF patients were found in areas with the highest index of deprivation.  
20  
21 This, combined with the likelihood for people living in the most deprived quintile having longer  
22  
23 inpatient stays due to a lack of support at home, may explain the difference in inpatient care  
24  
25 utilisation between patients from the most and the least deprived areas, with associated costs  
26  
27 being higher for the former group. As AF is more likely to affect the elderly, so that costs were  
28  
29 expected to increase with age. As health deteriorates with age, older age groups are assumed  
30  
31 to make greater use of healthcare services, and therefore incur higher costs than younger age  
32  
33 groups. However, age was found to have a modest impact on overall healthcare costs, being  
34  
35 fairly consistent across age groups. This finding is in line with existing evidence indicating that  
36  
37 healthcare expenditure depends not only on patients' calendar age, but is also significantly  
38  
39 associated with remaining lifetime [27].  
40  
41  
42  
43  
44  
45  
46

47 Any observed correlation between healthcare expenditure and age may therefore be attributable  
48  
49 to the fact that the proportion of patients who are at the end of their lives is substantially greater  
50  
51 in older rather than younger age groups [27]. On the other hand, comorbidity had a considerable  
52  
53 effect on the overall costs, increasing significantly in patients with more than one comorbidity.  
54  
55 However, the decrease in healthcare utilisation by age is more pronounced in patients with  
56  
57 more comorbidities than in those with only one comorbidity.  
58  
59  
60

1  
2  
3 Decreasing inpatient and outpatient costs for the oldest patients were offset by increasing care  
4 home costs, in particular for women. Indeed, the main cause for higher overall costs incurred  
5 by women is attributable to the higher likelihood for elderly women to reside in care homes.  
6  
7

8  
9  
10 Interestingly, care home contribution to the overall costs was noticeably lower for patients with  
11 multiple comorbidities than for those with none or one comorbidity. This may suggest that  
12 sicker patients are more likely to be in hospital than in a care home.  
13  
14  
15

16  
17  
18  
19 To date, only one single study published in 2004 has estimated the cost of AF in Scotland; the  
20 authors estimated the cost of AF in 1995/1996 with the medicalised approach , and projected  
21 these to the year 2000 [28]. Previous work has focussed on a 12-months follow-up, which  
22 seems limited in order to capture all healthcare resource utilisation for AF patients. Our study  
23 offers a longer follow-up and a contemporary estimate of healthcare costs related to AF  
24 including all relevant care settings. Our study offers a distinct advantage over previous work  
25 as costs, rather than being based on extrapolated rates using a prevalence-based approach [28],  
26 are estimated with an incidence-based method using patient-level morbidity records. Using an  
27 incidence based approach to costing and a broad perspective to capture the majority of costs  
28 associated with AF, several routinely collected administrative datasets from Scotland were  
29 combined, including care home utilisation.  
30  
31  
32  
33  
34  
35  
36  
37  
38  
39  
40  
41  
42  
43  
44  
45  
46

47 Existing studies, including ours, regardless of econometric model choice and covariates used,  
48 show that costs due to inpatient admission are the main contributor to overall AF related  
49 healthcare cost. This is a pertinent finding that may well support future policies on  
50 opportunistic screening in the population at risk of AF, and in particular in Scotland where 1  
51 in 3 patients with AF are currently undiagnosed [29].  
52  
53  
54  
55  
56  
57  
58  
59  
60



1  
2  
3 The European AF management guidelines and the Scottish Cross-Party Group ‘Heart Disease  
4 and Stroke’, recently recommended that people who are 65 years or older and at risk of AF and  
5 associated comorbidities such as cardiovascular disease, diabetes or respiratory disease should  
6 be screened opportunistically in primary care, pharmacies or community settings [29, 30]. With  
7 rigorous screening and appropriate treatment, hospitalisations could be avoided and costs  
8 reduced.  
9

10  
11  
12 Although we have captured most healthcare sectors and related costs, we were not able to  
13 obtain national data on primary care consultations, as these data are currently not routinely  
14 available for linkage in Scotland. Not capturing these data, may lead to an underestimation of  
15 the size of the AF cohort and associated costs. However, the costs associated with primary care  
16 consultations is expected to have a limited impact on the overall total AF related costs. Such  
17 underestimation could also result from AF going undiagnosed and clinical miscoding of  
18 morbidity records. Nevertheless, by using a cohort of patients hospitalised with AF we were  
19 able to capture more severe cases of AF. Prescribing and care home data were only available  
20 respectively from 2009 to 2012, their contribution to overall AF related costs might also be  
21 underestimated. Other limitations are inherent to the nature of administrative data, such as  
22 missing records or incomplete data.  
23  
24  
25  
26  
27  
28  
29  
30  
31  
32  
33  
34  
35  
36  
37  
38  
39  
40  
41  
42  
43  
44  
45  
46

47 Further, we acknowledge the issue concerning attributing AF related costs to patients with a  
48 structural heart disease, as AF may manifest subsequently because of this. In our analysis, we  
49 identified about 14% of AF patients with a structural heart disease; these were patients with  
50 systolic dysfunction, valvular heart disease or heart valve replacement. However, from the  
51 hospital data it was not possible to establish causation between structural heart disease and AF.  
52  
53  
54  
55  
56  
57  
58  
59  
60

1  
2  
3 In addition, this is likely to have a marginal impact on our conclusions, as the global  
4 comprehensive approach used in this study include expenditures that are not necessarily related  
5 to AF.  
6  
7  
8  
9

10  
11  
12 We also acknowledge that specifying whether patients had received cardiovascular procedures  
13 (e.g. cardioversion, echocardiograms and angiograms) would improve the accuracy of our cost  
14 estimation, as it would indicate whether costs should be attributable to AF or coronary artery  
15 disease. However, this information is not currently available in our routinely collected data of  
16 hospital admissions. Nevertheless, because AF is coded at discharge, we can be confident that  
17 the estimated costs are attributable to AF.  
18  
19  
20  
21  
22  
23  
24  
25  
26  
27

28  
29 Recognising these limitations, we were nevertheless able to harness high quality patient-level  
30 linked data to identify a cohort of AF patients and to estimate their associated healthcare  
31 utilisation and costs in Scotland.  
32  
33  
34  
35  
36  
37

38 The inclusion of all available cost components is crucial for establishing overall costs, as these  
39 often extend beyond hospitalisation. The study identifies hospitalisation as the main cost driver  
40 and suggests that the implementation of AF screening policies could substantially reduce AF  
41 related health care costs. Most importantly, the study concludes that patient's age has a limited  
42 impact on the overall AF related cost, and therefore may contribute much less to future growth  
43 of AF related cost in an ever-ageing Scottish population.  
44  
45  
46  
47  
48  
49  
50  
51  
52  
53

54 Future work will be able to utilise Scottish Stroke Care Audit (SSCA) records, allowing for the  
55 identification of additional AF patients; these are patients hospitalised with a stroke, where AF  
56 has been recorded in audit data as an underlying comorbidity.  
57  
58  
59  
60

1  
2  
3 Being able to complement inpatient records with SSCA records will allow us to capture more  
4  
5 AF patients in Scotland. Moreover, future research may be able to include indirect costs  
6  
7 associated with productivity-loss by linking morbidity and prescribing data to national data  
8  
9  
10 from the Department for Work and Pensions, for instance.  
11  
12  
13  
14  
15  
16  
17  
18  
19  
20  
21  
22  
23  
24  
25  
26  
27  
28  
29  
30  
31  
32  
33  
34  
35  
36  
37  
38  
39  
40  
41  
42  
43  
44  
45  
46  
47  
48  
49  
50  
51  
52  
53  
54  
55  
56  
57  
58  
59  
60

For peer review only

1  
2  
3 **Acknowledgements:** We thank the members of the Information Services Division, National  
4 Services Scotland, for their support. We acknowledge the support from The Farr Institute @  
5 Scotland. The Farr Institute @ Scotland is supported by a 10-funder consortium: Arthritis  
6 Research UK, the British Heart Foundation, Cancer Research UK, the Economic and Social  
7 Research Council, the Engineering and Physical Sciences Research Council, the Medical  
8 Research Council, the National Institute of Health Research, the National Institute for Social  
9 Care and Health Research (Welsh Assembly Government), the Chief Scientist Office (Scottish  
10 Government Health Directorates), the Wellcome Trust (MRC Grant No: MR/K007017/1).  
11  
12  
13  
14  
15  
16  
17  
18  
19  
20  
21

22 **Author contributions:** GC, CG, PL and OW conceived the article. GC carried out the  
23 statistical analysis and prepared the first draft of the manuscript. GC, CG, PL and OW  
24 contributed to editing the manuscript and approved the final version submitted for  
25 publication.  
26  
27  
28  
29  
30

31 **Funding sources:** This work was supported by Farr Institute for Health Informatics Research,  
32 Scotland, MRC, grant number MR/K007017/1  
33  
34  
35

36 **Competing interest:** The authors declare no conflict of interest.  
37

38 **Data Statement:** All data underlying the analyses are confidential and subject to disclosure  
39 control. Data can only be obtained through application to Information Services Division (ISD)  
40 via the Public Benefit and Privacy Panel (PBPP).  
41  
42  
43  
44  
45  
46  
47  
48  
49  
50  
51  
52  
53  
54  
55  
56  
57  
58  
59  
60

## References

1. Heath Improvement Scotland. *Prevention of stroke in patients with atrial fibrillation*. 2013 [cited 2016 January 2016]; Available from: [http://www.sign.ac.uk/assets/af\\_publication.pdf](http://www.sign.ac.uk/assets/af_publication.pdf).
2. Bennell, M.C., et al., *Identifying predictors of cumulative healthcare costs in incident atrial fibrillation: a population-based study*. J Am Heart Assoc, 2015. **4**(4).
3. Hallinen, T., et al., *Direct costs of warfarin treatment among patients with atrial fibrillation in a Finnish health care setting*. Curr Med Res Opin, 2006. **22**(4): p. 683-92.
4. Nelson, W.W., et al., *Out-of-range international normalized ratio values and healthcare cost among new warfarin patients with non-valvular atrial fibrillation*. J Med Econ, 2015. **18**(5): p. 333-40.
5. Ghate, S.R., et al., *All-cause and bleeding-related health care costs in warfarin-treated patients with atrial fibrillation*. J Manag Care Pharm, 2011. **17**(9): p. 672-84.
6. Rohrbacker, N.J., et al., *The burden of atrial fibrillation and other cardiac arrhythmias in an employed population: associated costs, absences, and objective productivity loss*. J Occup Environ Med, 2010. **52**(4): p. 383-91.
7. Wu, E.Q., et al., *Economic burden and co-morbidities of atrial fibrillation in a privately insured population*. Curr Med Res Opin, 2005. **21**(10): p. 1693-9.
8. Holstenson, E., et al., *Predictors of costs related to cardiovascular disease among patients with atrial fibrillation in five European countries*. Europace, 2011. **13**(1): p. 23-30.
9. Reynolds, M.R., et al., *Healthcare resource utilization and costs associated with recurrent episodes of atrial fibrillation: the FRACTAL registry*. J Cardiovasc Electrophysiol, 2007. **18**(6): p. 628-33.
10. Jonsson, L., et al., *Cost of illness and drivers of cost in atrial fibrillation in Sweden and Germany*. Appl Health Econ Health Policy, 2010. **8**(5): p. 317-25.
11. Johnsen, S.P., et al., *Cost of illness of atrial fibrillation: a nationwide study of societal impact*. BMC Health Services Research, 2017. **17**(1): p. 714.
12. Tarricone, R., *Cost-of-illness analysis. What room in health economics?* Health Policy, 2006. **77**(1): p. 51-63.
13. de Lagasnerie, G., et al., *The economic burden of diabetes to French national health insurance: a new cost-of-illness method based on a combined medicalized and incremental approach*. Eur J Health Econ, 2018. **19**(2): p. 189-201.
14. Information Services Division Scotland. *General Acute Inpatient and Day Case - Scottish Morbidity Record (SMR01)*. 2015 [cited 2017 November 2017]; Available from: <http://www.ndc.scot.nhs.uk/National-Datasets/data.asp?SubID=2>.
15. Information Services Division Scotland. *Outpatient Attendance (SMR00)*. 2015 [cited 2015 January 2015]; Available from: <http://www.ndc.scot.nhs.uk/National-Datasets/data.asp?SubID=2>.
16. Information Service Division Scotland. *Care Home Census 2015*. 2015 [cited 2015 November 2015]; Available from: <http://www.isdscotland.org/Health-Topics/Health-and-Social-Community-Care/Care-Homes/Previous-Publications/>.
17. Information Service Division Scotland. *Scottish National Tariff*. 2015 [cited 2015 December 2015]; Available from: <http://www.isdscotland.org/Health-Topics/Finance/Scottish-National-Tariff/>.

18. Healthcare Resource Groups. *Healthcare Resource Groups*. 2015 [cited 2015 November 2015]; Available from: <http://www.hscic.gov.uk/hrg>.
19. Alvarez-Madrazo, S., et al., *Data Resource Profile: The Scottish National Prescribing Information System (PIS)*. International Journal of Epidemiology, 2016.
20. Henry, A.G., et al., *Economic Evaluation in Clinical Trials*. 'Oxford University Press': Oxford, UK.
21. Manning, W.G., A. Basu, and J. Mullahy, *Generalized modeling approaches to risk adjustment of skewed outcomes data*. Journal of Health Economics, 2005. **24**(3): p. 465-488.
22. The Scottish Government. *Scottish Index of Multiple Deprivation*. 2015 [cited 2015 November 2015]; Available from: <http://www.gov.scot/Topics/Statistics/SIMD>.
23. The Scottish Government. *NHS Boards*. 2015 [cited 2015 January 2015]; Available from: <http://www.gov.scot/Topics/Health/NHS-Workforce/NHS-Boards>.
24. The Scottish Government. *Scottish Government Urban Rural Classification*. 2015 [cited 2015 January 2015]; Available from: <http://www.gov.scot/Topics/Statistics/About/Methodology/UrbanRuralClassification>.
25. Charlson, M.E., et al., *A new method of classifying prognostic comorbidity in longitudinal studies: Development and validation*. Journal of Chronic Diseases, 1987. **40**(5): p. 373-383.
26. Leyland, A.H., et al., *Cause-specific inequalities in mortality in Scotland: two decades of change. A population-based study*. BMC Public Health, 2007. **7**: p. 172.
27. Zweifel, P., S. Felder, and M. Meiers, *Ageing of population and health care expenditure: a red herring?* Health Econ, 1999. **8**(6): p. 485-96.
28. Stewart, S., et al., *Cost of an emerging epidemic: an economic analysis of atrial fibrillation in the UK*. Heart, 2004. **90**(3): p. 286-292.
29. Stroke, C.-P.G.o.H.D.a. *A Focus on Atrial Fibrillation in Scotland 2017*. 2017 March 2018]; Available from: <https://www.chss.org.uk/documents/2018/01/a-focus-on-atrial-fibrillation-in-scotland-pdf.pdf>.
30. Camm, A.J., et al., *2012 focused update of the ESC Guidelines for the management of atrial fibrillation: an update of the 2010 ESC Guidelines for the management of atrial fibrillation. Developed with the special contribution of the European Heart Rhythm Association*. Eur Heart J, 2012. **33**(21): p. 2719-47.

## Figure legends

**Figure 1.** Average annual costs per patient hospitalised with AF by sector. Cost components with confidence interval are presented for each age group.

**Figure 2.** Average cost per patient hospitalised with AF by Charlson Comorbidity Index. Cost components with confidence interval are presented for each Comorbidity category.

For peer review only

## Tables

Table 1. Baseline characteristics of AF patients

| Characteristics                           | N (%)                 |
|-------------------------------------------|-----------------------|
| Number of patients                        | 278,286               |
| Mean age at first admission*(SD)**(range) | 74 *(12.5) **(0 -108) |
| Sex                                       |                       |
| Male                                      | 139,928 (50.3)        |
| Female                                    | 138,358 (49.7)        |
| Health Boards                             |                       |
| Greater Glasgow & Clyde                   | 61,822 (22.2)         |
| Lothian                                   | 41,169 (14.8)         |
| Lanarkshire                               | 31,049 (11.2)         |
| Grampian                                  | 25,728 (9.3)          |
| Ayrshire & Arran                          | 22,003 (7.9)          |
| Tayside                                   | 25,003 (9.0)          |
| Fife                                      | 17,954 (6.5)          |
| Highland                                  | 18,929 (6.9)          |
| Forth valley                              | 13,664 (4.9)          |
| Dumfries & Galloway                       | 9,798 (3.5)           |
| Borders                                   | 7,222 (2.6)           |
| Western isles                             | 1,868 (0.7)           |
| Shetland                                  | 1,036 (0.4)           |
| Orkney                                    | 1,041 (0.4)           |
| Geography                                 |                       |
| Large/urban                               | 106,868 (38.4)        |
| Other/urban                               | 82,601 (29.7)         |
| Accessible small towns                    | 24,938 (9.0)          |
| Remote small towns                        | 8,272 (3.0)           |
| Very remote small towns                   | 3,828 (1.4)           |
| Accessible rural                          | 30,826 (11.1)         |
| Remote rural                              | 10,371 (3.7)          |
| Very remote rural                         | 10,087 (3.6)          |
| SIMD quintile                             |                       |
| 1                                         | 62,730 (22.5)         |
| 2                                         | 62,632 (22.5)         |
| 3                                         | 55,943 (20.1)         |
| 4                                         | 50,691 (18.2)         |
| 5                                         | 46,279 (16.6)         |
| Comorbidity                               |                       |
| no comorbidity                            | 40,502 (14.6)         |
| 1 comorbidity                             | 53,651 (19.3)         |
| >1 comorbidities                          | 184,133 (66.2)        |
| Re-hospitalised (any condition)           | 179,494 (64.5)        |
| Admitted to care-home                     | 7,235 (2.6)           |
| Mortality                                 |                       |
| Alive                                     | 204,690 (73.6)        |
| Dead                                      | 73,596 (26.4)         |



**Table 2. Regression results: probability of healthcare resources utilisation and cost estimation**

| Covariates               | Probability<br>(1 <sup>st</sup> modelling part) |          | Cost Ratios<br>(2 <sup>nd</sup> modelling part) |          |
|--------------------------|-------------------------------------------------|----------|-------------------------------------------------|----------|
|                          | Coefficient (95% CI)                            | Std. Err | Coefficient (95% CI)                            | Std. Err |
| <b>Age group (years)</b> |                                                 |          |                                                 |          |
| 0-49                     | Reference                                       |          |                                                 |          |
| 50-54                    | 0.329 (0.260, 0.398)                            | 0.035    | 0.036 (-0.016, 0.087)                           | 0.026    |
| 55-59                    | 0.388 (0.326, 0.450)                            | 0.031    | 0.081 (0.036, 0.127)                            | 0.023    |
| 60-64                    | 0.464 (0.407, 0.521)                            | 0.029    | 0.124 (0.082, 0.166)                            | 0.021    |
| 65-69                    | 0.486 (0.432, 0.540)                            | 0.028    | 0.157 (0.116, 0.198)                            | 0.021    |
| 70-74                    | 0.479 (0.426, 0.533)                            | 0.027    | 0.213 (0.174, 0.252)                            | 0.020    |
| 75-79                    | 0.536 (0.482, 0.590)                            | 0.027    | 0.222 (0.183, 0.260)                            | 0.020    |
| 80-84                    | 0.431 (0.375, 0.486)                            | 0.028    | 0.286 (0.246, 0.326)                            | 0.020    |
| 85-89                    | 0.378 (0.318, 0.437)                            | 0.030    | 0.375 (0.332, 0.417)                            | 0.021    |
| 90-max                   | 0.150 (0.083, 0.217)                            | 0.034    | 0.516 (0.468, 0.564)                            | 0.025    |
| <b>Sex</b>               |                                                 |          |                                                 |          |
| Male                     | Reference                                       |          |                                                 |          |
| Female                   | 0.045 (0.028, 0.062)                            | 0.009    | 0.054 (0.044, 0.064)                            | 0.005    |
| Date of admission        | 0.169 (0.167, 0.171)                            | 0.001    | -0.024 (-0.025, -0.023)                         | 0.001    |
| <b>SIMD quintile</b>     |                                                 |          |                                                 |          |
| 1                        | Reference                                       |          |                                                 |          |
| 2                        | 0.027 (-0.018, 0.071)                           | 0.023    | -0.055 (-0.080, -0.031)                         | 0.012    |
| 3                        | -0.041 (-0.086, 0.003)                          | 0.023    | -0.080 (-0.106, -0.054)                         | 0.013    |
| 4                        | -0.046 (-0.091, -0.002)                         | 0.023    | -0.116 (-0.141, -0.090)                         | 0.013    |
| 5                        | -0.072 (-0.117, -0.027)                         | 0.023    | -0.147 (-0.172, -0.122)                         | 0.013    |
| <b>Geography</b>         |                                                 |          |                                                 |          |
| Large urban              | Reference                                       |          |                                                 |          |
| Other urban              | -0.130 (-0.156, -0.105)                         | 0.013    | -0.023 (-0.037, -0.009)                         | 0.007    |
| Accessible small towns   | -0.153 (-0.187, -0.119)                         | 0.017    | -0.041 (-0.060, -0.022)                         | 0.010    |
| Accessible rural         | -0.197 (-0.230, -0.165)                         | 0.016    | -0.043 (-0.062, -0.024)                         | 0.010    |
| Remote small towns       | -0.145 (-0.197, -0.093)                         | 0.027    | 0.009 (-0.023, 0.041)                           | 0.016    |
| Remote rural             | -0.288 (-0.335, -0.241)                         | 0.024    | -0.036 (-0.065, -0.007)                         | 0.015    |
| Very remote small towns  | -0.380 (-0.459, -0.300)                         | 0.041    | -0.057 (-0.107, -0.006)                         | 0.026    |
| Very remote rural        | -0.346 (-0.407, -0.284)                         | 0.031    | -0.061 (-0.102, -0.020)                         | 0.021    |
| <b>Health boards</b>     |                                                 |          |                                                 |          |
| Great Glasgow and Clyde  | Reference                                       |          |                                                 |          |
| Lothian                  | -0.044 (-0.075, -0.014)                         | 0.016    | -0.033 (-0.049, -0.017)                         | 0.008    |
| Lanarkshire              | -0.005 (-0.038, 0.029)                          | 0.017    | -0.063 (-0.081, -0.045)                         | 0.009    |
| Ayrshire and Arran       | -0.358 (-0.394, -0.321)                         | 0.019    | -0.046 (-0.068, -0.024)                         | 0.011    |
| Grampian                 | 0.017 (-0.019, 0.054)                           | 0.019    | -0.059 (-0.078, -0.039)                         | 0.010    |
| Tayside                  | -0.402 (-0.436, -0.368)                         | 0.018    | -0.083 (-0.103, -0.062)                         | 0.010    |
| Fife                     | -0.059 (-0.101, -0.017)                         | 0.022    | -0.009 (-0.033, 0.016)                          | 0.012    |
| Highland                 | -0.175 (-0.225, -0.124)                         | 0.026    | -0.046 (-0.077, -0.015)                         | 0.016    |
| Forth Valley             | -0.477 (-0.518, -0.436)                         | 0.021    | -0.109 (-0.135, -0.082)                         | 0.013    |
| Dumfries and Galloway    | -0.303 (-0.352, -0.253)                         | 0.025    | -0.134 (-0.164, -0.104)                         | 0.015    |
| Borders                  | -0.501 (-0.554, -0.449)                         | 0.027    | -0.086 (-0.120, -0.052)                         | 0.017    |
| Western Isles            | -1.072 (-1.171, -0.974)                         | 0.050    | 0.457 (0.381, 0.533)                            | 0.039    |

|                          |                         |       |                        |       |
|--------------------------|-------------------------|-------|------------------------|-------|
| Orkney                   | -0.362 (-0.492, -0.232) | 0.066 | -0.029 (-0.117, 0.059) | 0.045 |
| Shetland                 | -0.495 (-0.622, -0.368) | 0.065 | -0.076 (-0.171, 0.018) | 0.048 |
| Mortality within 5 years |                         |       |                        |       |
| Alive                    | Reference               |       |                        |       |
| Dead                     | 0.418 (0.376, 0.461)    | 0.022 | 0.652 (0.630, 0.674)   | 0.011 |
| Comorbidity              |                         |       |                        |       |
| no comorbidities         | Reference               |       |                        |       |
| 1 comorbidity            | 0.666 (0.567, 0.766)    | 0.051 | 0.374 (0.299, 0.450)   | 0.038 |
| >1 comorbidities         | 1.205 (1.021, 1.390)    | 0.094 | 0.990 (0.910, 1.070)   | 0.041 |

**Table 3. Regression results: probability of healthcare resources utilisation and cost estimation (alive at the end of the five-year follow-up period)**

| Covariates              | Probability<br>(1 <sup>st</sup> modelling part) |          | Cost Ratios<br>(2 <sup>nd</sup> modelling part) |          |
|-------------------------|-------------------------------------------------|----------|-------------------------------------------------|----------|
|                         | Coefficient (95% CI)                            | Std. Err | Coefficient (95% CI)                            | Std. Err |
| Age group (years)       |                                                 |          |                                                 |          |
| 0-49                    | Reference                                       |          |                                                 |          |
| 50-54                   | 0.352 (0.282, 0.422)                            | 0.036    | 0.067 (0.013, 0.120)                            | 0.027    |
| 55-59                   | 0.424 (0.361, 0.488)                            | 0.032    | 0.148 (0.098, 0.199)                            | 0.026    |
| 60-64                   | 0.528 (0.470, 0.586)                            | 0.030    | 0.218 (0.174, 0.263)                            | 0.023    |
| 65-69                   | 0.571 (0.516, 0.627)                            | 0.028    | 0.292 (0.248, 0.336)                            | 0.022    |
| 70-74                   | 0.603 (0.549, 0.658)                            | 0.028    | 0.412 (0.371, 0.454)                            | 0.021    |
| 75-79                   | 0.684 (0.630, 0.739)                            | 0.028    | 0.484 (0.443, 0.525)                            | 0.021    |
| 80-84                   | 0.572 (0.516, 0.628)                            | 0.028    | 0.615 (0.572, 0.659)                            | 0.022    |
| 85-89                   | 0.496 (0.435, 0.557)                            | 0.031    | 0.805 (0.756, 0.854)                            | 0.025    |
| 90-max                  | 0.206 (0.134, 0.279)                            | 0.037    | 1.044 (0.981, 1.106)                            | 0.032    |
| Sex                     |                                                 |          |                                                 |          |
| Male                    | Reference                                       |          |                                                 |          |
| Female                  | 0.067 (0.048, 0.086)                            | 0.010    | 0.050 (0.037, 0.063)                            | 0.007    |
| Date of admission       | 0.171 (0.170, 0.173)                            | 0.001    | -0.059 (-0.060, -0.057)                         | 0.001    |
| SIMD quintile           |                                                 |          |                                                 |          |
| 1                       | Reference                                       |          |                                                 |          |
| 2                       | 0.021 (-0.009, 0.050)                           | 0.015    | -0.052 (-0.071, -0.033)                         | 0.010    |
| 3                       | -0.023 (-0.054, 0.008)                          | 0.016    | -0.081 (-0.101, -0.060)                         | 0.011    |
| 4                       | -0.045 (-0.077, -0.014)                         | 0.016    | -0.117 (-0.138, -0.096)                         | 0.011    |
| 5                       | -0.051 (-0.083, -0.020)                         | 0.016    | -0.160 (-0.181, -0.139)                         | 0.011    |
| Geography               |                                                 |          |                                                 |          |
| Large urban             | Reference                                       |          |                                                 |          |
| Other urban             | -0.140 (-0.169, -0.112)                         | 0.014    | -0.030 (-0.049, -0.012)                         | 0.010    |
| Accessible small towns  | -0.172 (-0.210, -0.134)                         | 0.019    | -0.052 (-0.077, -0.026)                         | 0.013    |
| Accessible rural        | -0.217 (-0.253, -0.181)                         | 0.018    | -0.061 (-0.086, -0.037)                         | 0.013    |
| Remote small towns      | -0.145 (-0.203, -0.087)                         | 0.030    | -0.007 (-0.048, 0.035)                          | 0.021    |
| Remote rural            | -0.319 (-0.371, -0.268)                         | 0.026    | -0.064 (-0.101, -0.027)                         | 0.019    |
| Very remote small towns | -0.404 (-0.491, -0.318)                         | 0.044    | -0.098 (-0.161, -0.036)                         | 0.032    |
| Very remote rural       | -0.360 (-0.428, -0.293)                         | 0.034    | -0.087 (-0.138, -0.035)                         | 0.026    |

| Health boards           |                         |       |                         |       |  |
|-------------------------|-------------------------|-------|-------------------------|-------|--|
| Great Glasgow and Clyde | Reference               |       |                         |       |  |
| Lothian                 | -0.055 (-0.090, -0.020) | 0.018 | -0.051 (-0.072, -0.030) | 0.011 |  |
| Lanarkshire             | 0.003 (-0.034, 0.040)   | 0.019 | -0.072 (-0.095, -0.048) | 0.012 |  |
| Ayrshire and Arran      | -0.396 (-0.436, -0.355) | 0.021 | -0.064 (-0.093, -0.035) | 0.015 |  |
| Grampian                | 0.029 (-0.013, 0.070)   | 0.021 | -0.051 (-0.077, -0.026) | 0.013 |  |
| Tayside                 | -0.453 (-0.491, -0.415) | 0.019 | -0.094 (-0.120, -0.067) | 0.014 |  |
| Fife                    | -0.087 (-0.134, -0.040) | 0.024 | -0.024 (-0.057, 0.008)  | 0.017 |  |
| Highland                | -0.191 (-0.247, -0.135) | 0.029 | -0.037 (-0.075, 0.001)  | 0.020 |  |
| Forth Valley            | -0.520 (-0.566, -0.474) | 0.023 | -0.108 (-0.141, -0.074) | 0.017 |  |
| Dumfries and Galloway   | -0.314 (-0.369, -0.259) | 0.028 | -0.166 (-0.206, -0.127) | 0.020 |  |
| Borders                 | -0.547 (-0.605, -0.489) | 0.030 | -0.099 (-0.144, -0.054) | 0.023 |  |
| Western Isles           | -1.164 (-1.264, -1.063) | 0.051 | 0.139 (0.057, 0.221)    | 0.042 |  |
| Orkney                  | -0.394 (-0.535, -0.252) | 0.072 | 0.002 (-0.114, 0.117)   | 0.059 |  |
| Shetland                | -0.605 (-0.740, -0.470) | 0.069 | -0.044 (-0.172, 0.085)  | 0.066 |  |
| Comorbidity             |                         |       |                         |       |  |
| no comorbidities        | Reference               |       |                         |       |  |
| 1 comorbidity           | 0.705 (0.602, 0.808)    | 0.052 | 0.432 (0.352, 0.513)    | 0.041 |  |
| >1 comorbidities        | 1.165 (0.974, 1.357)    | 0.098 | 1.133 (1.041, 1.226)    | 0.047 |  |

**Table 4. Regression results: probability of healthcare resources utilisation and cost estimation (dead at the end of the five-year follow-up period)**

| Covariates               | Probability<br>(1 <sup>st</sup> modelling part) |          | Cost Ratios<br>(2 <sup>nd</sup> modelling part) |          |
|--------------------------|-------------------------------------------------|----------|-------------------------------------------------|----------|
|                          | Coefficient (95% CI)                            | Std. Err | Coefficient (95% CI)                            | Std. Err |
| <b>Age group (years)</b> | Reference                                       |          |                                                 |          |
| 0-49                     | Reference                                       |          |                                                 |          |
| 50-54                    | 0.150 (-0.125, 0.426)                           | 0.141    | -0.112 (-0.405, 0.180)                          | 0.149    |
| 55-59                    | 0.134 (-0.098, 0.366)                           | 0.118    | -0.093 (-0.334, 0.147)                          | 0.123    |
| 60-64                    | 0.129 (-0.080, 0.338)                           | 0.107    | 0.000 (-0.208, 0.209)                           | 0.106    |
| 65-69                    | 0.129 (-0.067, 0.326)                           | 0.101    | -0.011 (-0.212, 0.189)                          | 0.102    |
| 70-74                    | 0.107 (-0.084, 0.298)                           | 0.097    | 0.016 (-0.180, 0.213)                           | 0.100    |
| 75-79                    | 0.128 (-0.059, 0.315)                           | 0.095    | -0.005 (-0.198, 0.189)                          | 0.099    |
| 80-84                    | 0.132 (-0.053, 0.318)                           | 0.095    | 0.056 (-0.136, 0.247)                           | 0.098    |
| 85-89                    | -0.048 (-0.233, 0.137)                          | 0.094    | 0.066 (-0.126, 0.257)                           | 0.098    |
| 90-max                   | -0.518 (-0.702, -0.333)                         | 0.094    | 0.097 (-0.095, 0.290)                           | 0.098    |
| <b>Sex</b>               | Reference                                       |          |                                                 |          |
| Male                     | Reference                                       |          |                                                 |          |
| Female                   | 0.048 (0.033, 0.063)                            | 0.008    | 0.028 (0.014, 0.043)                            | 0.007    |
| Date of admission        | -0.040 (-0.042, -0.039)                         | 0.001    | 0.004 (0.002, 0.005)                            | 0.001    |
| <b>SIMD quintile</b>     | Reference                                       |          |                                                 |          |
| 1                        | Reference                                       |          |                                                 |          |
| 2                        | 0.033 (0.011, 0.055)                            | 0.011    | 0.015 (-0.005, 0.036)                           | 0.011    |
| 3                        | 0.058 (0.034, 0.082)                            | 0.012    | -0.008 (-0.030, 0.015)                          | 0.012    |
| 4                        | 0.065 (0.039, 0.090)                            | 0.013    | -0.017 (-0.041, 0.007)                          | 0.012    |

|                         |                         |       |                         |       |
|-------------------------|-------------------------|-------|-------------------------|-------|
| 5                       | 0.113 (0.088, 0.138)    | 0.013 | -0.024 (-0.049, 0.000)  | 0.012 |
| <b>Geography</b>        |                         |       |                         |       |
| Large urban             | Reference               |       |                         |       |
| Other urban             | -0.010 (-0.032, 0.012)  | 0.011 | -0.033 (-0.054, -0.012) | 0.011 |
| Accessible small towns  | -0.006 (-0.036, 0.025)  | 0.015 | -0.049 (-0.077, -0.021) | 0.014 |
| Accessible rural        | -0.031 (-0.060, -0.001) | 0.015 | -0.036 (-0.064, -0.008) | 0.014 |
| Remote small towns      | -0.054 (-0.102, -0.005) | 0.025 | 0.003 (-0.042, 0.049)   | 0.023 |
| Remote rural            | -0.038 (-0.084, 0.009)  | 0.024 | -0.012 (-0.057, 0.034)  | 0.023 |
| Very remote small towns | -0.065 (-0.147, 0.017)  | 0.042 | 0.036 (-0.052, 0.123)   | 0.045 |
| Very remote rural       | 0.014 (-0.051, 0.078)   | 0.033 | -0.002 (-0.068, 0.065)  | 0.034 |
| <b>Health boards</b>    |                         |       |                         |       |
| Great Glasgow and Clyde | Reference               |       |                         |       |
| Lothian                 | 0.029 (0.004, 0.055)    | 0.013 | 0.029 (0.006, 0.053)    | 0.012 |
| Lanarkshire             | -0.052 (-0.080, -0.023) | 0.014 | -0.034 (-0.061, -0.008) | 0.013 |
| Ayrshire and Arran      | -0.122 (-0.155, -0.089) | 0.017 | 0.011 (-0.020, 0.042)   | 0.016 |
| Grampian                | 0.075 (0.044, 0.106)    | 0.016 | -0.057 (-0.086, -0.028) | 0.015 |
| Tayside                 | -0.024 (-0.056, 0.007)  | 0.016 | -0.061 (-0.089, -0.033) | 0.014 |
| Fife                    | -0.028 (-0.064, 0.008)  | 0.018 | 0.047 (0.012, 0.082)    | 0.018 |
| Highland                | 0.034 (-0.015, 0.084)   | 0.025 | -0.065 (-0.117, -0.013) | 0.027 |
| Forth Valley            | -0.060 (-0.099, -0.021) | 0.020 | -0.123 (-0.161, -0.085) | 0.019 |
| Dumfries and Galloway   | -0.027 (-0.074, 0.020)  | 0.024 | -0.014 (-0.058, 0.029)  | 0.022 |
| Borders                 | -0.058 (-0.112, -0.005) | 0.027 | -0.023 (-0.074, 0.029)  | 0.026 |
| Western Isles           | -0.033 (-1.168, 1.102)  | 0.579 | 0.305 (-0.165, 0.775)   | 0.240 |
| Orkney                  | 0.191 (0.055, 0.327)    | 0.069 | -0.180 (-0.317, -0.042) | 0.070 |
| Shetland                | -0.031 (-0.170, 0.108)  | 0.071 | -0.187 (-0.323, -0.052) | 0.069 |
| <b>Comorbidity</b>      |                         |       |                         |       |
| no comorbidities        | Reference               |       |                         |       |
| 1 comorbidity           | -0.176 (-0.449, 0.097)  | 0.139 | 0.147 (-0.127, 0.422)   | 0.140 |
| >1 comorbidities        | -0.256 (-0.491, -0.021) | 0.120 | 0.626 (0.401, 0.851)    | 0.115 |

**Table 5. Average annual costs per patient hospitalised with AF by sex**

| Sex           | Cost estimates      |              |
|---------------|---------------------|--------------|
|               | Mean total cost (%) | 95% CI       |
| <b>Male</b>   |                     |              |
| Inpatient     | 2935 (79.99)        | (2915, 2955) |
| Outpatient    | 31 (8.46)           | (308, 313)   |
| Care home     | 165 (4.50)          | (154, 177)   |
| PIS           | 242 (6.60)          | (240, 245)   |
| Total         | 3669                | (3872, 3927) |
| <b>Female</b> |                     |              |
| Inpatient     | 3022 (77.49)        | (3001, 3042) |
| Outpatient    | 310 (7.96)          | (308, 313)   |
| Care home     | 268 (6.88)          | (255, 281)   |
| PIS           | 259 (6.64)          | (256, 262)   |
| Total         | 3968                | (3872, 3927) |

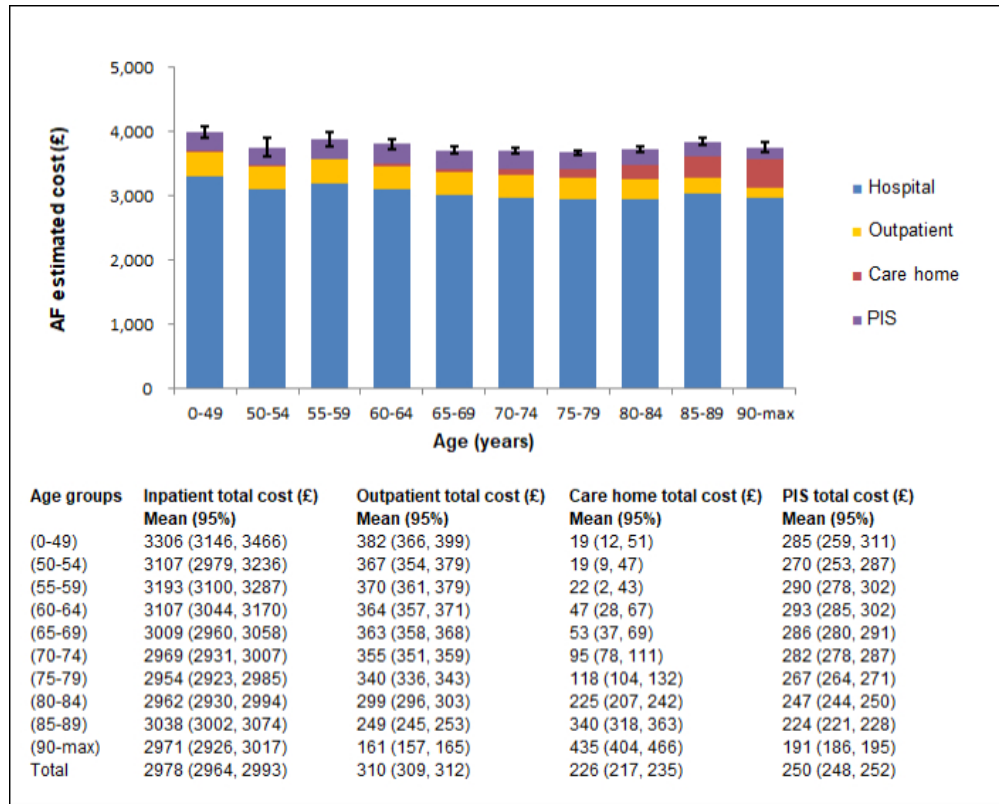

Average annual costs per patient hospitalised with AF by sector. Cost components with confidence interval are presented for each age group.

59x47mm (300 x 300 DPI)

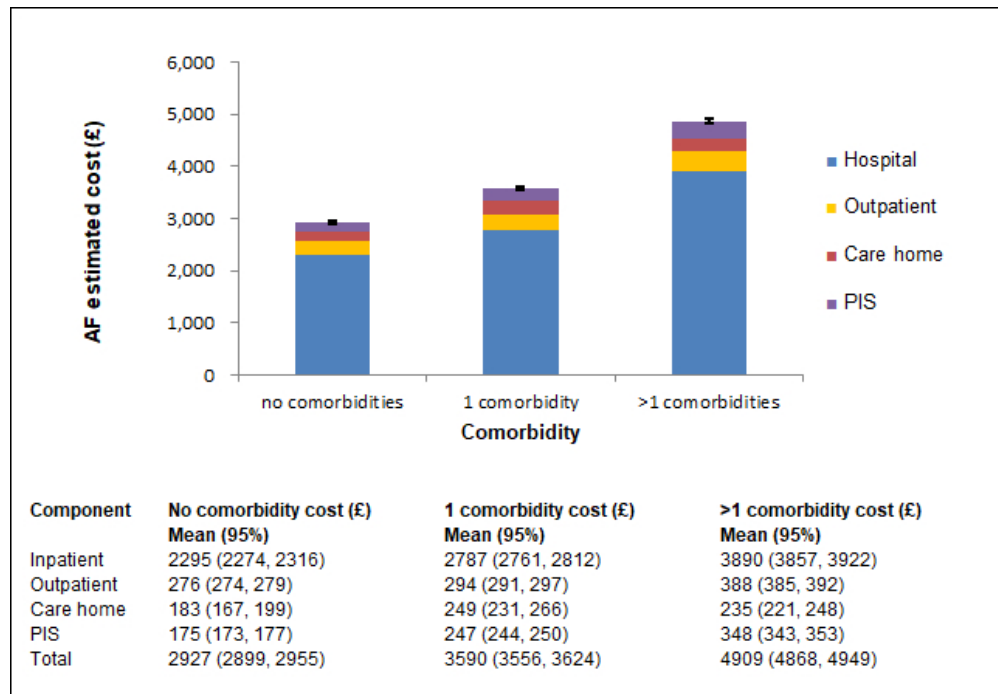

Average cost per patient hospitalised with AF by Charlson Comorbidity Index. Cost components with confidence interval are presented for each Comorbidity category.

54x37mm (300 x 300 DPI)

## ONLINE SUPPLEMENT

**Equation I. Probability of healthcare utilisation**

$$\Pr(HCE_{it} > 0) = \alpha + \beta_1 \sum_{s=2}^{10} A_{it} + \beta_2 G_i + \beta_3 Y_i + \beta_4 \sum_{s=2}^5 S_i + \beta_5 \sum_{u=2}^8 U_i + \beta_6 \sum_{h=2}^{14} H_i$$

$$+ \beta_7 \sum_{c=2}^3 C_{it} + \beta_8 D_i + \left( \beta_9 \sum_{s=2}^5 S_i * D_i \right) + \left( \beta_{10} \sum_{c=2}^3 C_{it} * \sum_{s=2}^{10} A_{it} \right) + u_i$$

Where: A is age at the time of admission (reference category: 0-49 age group); G is sex (reference category: male); Y year of admission; S is SIMD quintile (reference category: most deprived quintile (1)); U is the urban/rural classification (reference category: large urban area); H is health board of inpatient admission (reference category: Greater Glasgow & Clyde); C is the Charlson comorbidity index (reference category: no comorbidities); D is mortality during five year follow-up;  $u_i$  is the error term for patient  $i$  at time  $t$ .

**Equation II. Cost estimation**

$$E[HCE] = g(x\beta)$$

Where  $x\beta$  is the linear predictor for HCE

**Equation III. Multiplying first and second part**

$$E[HCE|X] = \Pr(HCE > 0|X) * E[HCE|HCE > 0, X]$$

**Table I. Regression interactions: probability of healthcare resources utilisation and cost estimation**

| Covariates                                                            | Probability<br>(1 <sup>st</sup> modelling part) |          | Probability<br>(2 <sup>nd</sup> modelling part) |          |
|-----------------------------------------------------------------------|-------------------------------------------------|----------|-------------------------------------------------|----------|
|                                                                       | Coefficient (95% CI)                            | Std. Err | Coefficient (95% CI)                            | Std. Err |
| <b>Interaction: SIMD - Mortality within 5 years</b>                   |                                                 |          |                                                 |          |
| 1                                                                     | Reference                                       |          |                                                 |          |
| 2                                                                     | -0.015 (-0.069, 0.038)                          | 0.027    | 0.056 (0.027, 0.086)                            | 0.015    |
| 3                                                                     | 0.046 (-0.007, 0.100)                           | 0.027    | 0.067 (0.036, 0.097)                            | 0.016    |
| 4                                                                     | 0.017 (-0.037, 0.071)                           | 0.028    | 0.089 (0.059, 0.120)                            | 0.016    |
| 5                                                                     | 0.069 (0.013, 0.125)                            | 0.029    | 0.100 (0.069, 0.132)                            | 0.016    |
| <b>Interaction: age (year) - Charlson score (1 comorbidity)</b>       |                                                 |          |                                                 |          |
| 0-49                                                                  | Reference                                       |          |                                                 |          |
| 50-54                                                                 | -0.195 (-0.342, -0.049)                         | 0.075    | -0.016 (-0.124, 0.092)                          | 0.055    |
| 55-59                                                                 | -0.384 (-0.514, -0.255)                         | 0.066    | -0.081 (-0.173, 0.012)                          | 0.047    |
| 60-64                                                                 | -0.459 (-0.579, -0.340)                         | 0.061    | -0.116 (-0.202, -0.031)                         | 0.044    |
| 65-69                                                                 | -0.500 (-0.613, -0.386)                         | 0.058    | -0.161 (-0.244, -0.078)                         | 0.042    |
| 70-74                                                                 | -0.510 (-0.621, -0.399)                         | 0.057    | -0.202 (-0.283, -0.121)                         | 0.041    |
| 75-79                                                                 | -0.570 (-0.680, -0.461)                         | 0.056    | -0.197 (-0.276, -0.117)                         | 0.041    |
| 80-84                                                                 | -0.594 (-0.704, -0.484)                         | 0.056    | -0.209 (-0.290, -0.128)                         | 0.041    |
| 85-89                                                                 | -0.643 (-0.756, -0.531)                         | 0.058    | -0.215 (-0.298, -0.132)                         | 0.042    |
| 90-max                                                                | -0.709 (-0.828, -0.590)                         | 0.061    | -0.267 (-0.357, -0.178)                         | 0.045    |
| <b>Interaction: age (year) - Charlson score (&gt;1 comorbidities)</b> |                                                 |          |                                                 |          |
| 0-49                                                                  | Reference                                       |          |                                                 |          |
| 50-54                                                                 | -0.449 (-0.685, -0.213)                         | 0.121    | -0.214 (-0.316, -0.111)                         | 0.052    |
| 55-59                                                                 | -0.539 (-0.751, -0.327)                         | 0.108    | -0.209 (-0.305, -0.112)                         | 0.049    |
| 60-64                                                                 | -0.534 (-0.734, -0.334)                         | 0.102    | -0.323 (-0.412, -0.234)                         | 0.045    |
| 65-69                                                                 | -0.573 (-0.767, -0.378)                         | 0.099    | -0.436 (-0.523, -0.350)                         | 0.044    |
| 70-74                                                                 | -0.650 (-0.842, -0.459)                         | 0.098    | -0.520 (-0.604, -0.436)                         | 0.043    |
| 75-79                                                                 | -0.767 (-0.957, -0.577)                         | 0.097    | -0.556 (-0.639, -0.473)                         | 0.042    |
| 80-84                                                                 | -0.857 (-1.047, -0.667)                         | 0.097    | -0.625 (-0.709, -0.541)                         | 0.043    |
| 85-89                                                                 | -0.967 (-1.159, -0.775)                         | 0.098    | -0.661 (-0.747, -0.576)                         | 0.044    |
| 90-max                                                                | -1.074 (-1.270, -0.878)                         | 0.100    | -0.805 (-0.896, -0.714)                         | 0.046    |



**Equation IV. Probability of healthcare utilisation (alive at the end of the five-year follow-up period)**

$$\Pr(HCE_{it} > 0) = \alpha + \beta_1 \sum_{s=2}^{10} A_{it} + \beta_2 G_i + \beta_3 Y_i + \beta_4 \sum_{s=2}^5 S_i + \beta_5 \sum_{u=2}^8 U_i + \beta_6 \sum_{h=2}^{14} H_i + \beta_7 \sum_{c=2}^3 C_{it} + \left( \beta_8 \sum_{c=2}^3 C_{it} * \sum_{s=2}^{10} A_{it} \right) + u_i$$

Where: A is age at the time of admission (reference category: 0 -49 age group); G is sex (reference category: male); Y year of admission; S is SIMD quintile (reference category: most deprived quintile (1)); U is the urban/rural classification (reference category: large urban area); H is health board of inpatient admission (reference category: Greater Glasgow & Clyde); C is the Charlson comorbidity index (reference category: no comorbidities);  $u_i$  is the error term for patient  $i$  at time  $t$ .

**Table II. Regression interactions: probability of healthcare resources utilisation and cost estimation (alive at the end of the five-year follow-up period)**

| Covariates                                                            | Probability<br>(1 <sup>st</sup> modelling part) |          | Probability<br>(2 <sup>nd</sup> modelling part) |          |
|-----------------------------------------------------------------------|-------------------------------------------------|----------|-------------------------------------------------|----------|
|                                                                       | Coefficient (95%CI)                             | Std. Err | Coefficient (95%CI)                             | Std. Err |
| <b>Interaction: age (year) - Charlson score (1 comorbidity)</b>       |                                                 |          |                                                 |          |
| 0-49                                                                  | Reference                                       |          |                                                 |          |
| 50-54                                                                 | -0.190 (-0.341, -0.039)                         | 0.077    | -0.015 (-0.126, 0.097)                          | 0.057    |
| 55-59                                                                 | -0.400 (-0.534, -0.266)                         | 0.069    | -0.087 (-0.187, 0.014)                          | 0.051    |
| 60-64                                                                 | -0.484 (-0.608, -0.360)                         | 0.063    | -0.116 (-0.208, -0.023)                         | 0.047    |
| 65-69                                                                 | -0.531 (-0.649, -0.412)                         | 0.060    | -0.143 (-0.233, -0.053)                         | 0.046    |
| 70-74                                                                 | -0.559 (-0.674, -0.443)                         | 0.059    | -0.195 (-0.283, -0.107)                         | 0.045    |
| 75-79                                                                 | -0.635 (-0.750, -0.521)                         | 0.058    | -0.207 (-0.293, -0.121)                         | 0.044    |
| 80-84                                                                 | -0.680 (-0.796, -0.565)                         | 0.059    | -0.215 (-0.304, -0.125)                         | 0.046    |
| 85-89                                                                 | -0.730 (-0.850, -0.610)                         | 0.061    | -0.254 (-0.349, -0.159)                         | 0.048    |
| 90-max                                                                | -0.827 (-0.959, -0.695)                         | 0.067    | -0.281 (-0.393, -0.169)                         | 0.057    |
| <b>Interaction: age (year) - Charlson score (&gt;1 comorbidities)</b> |                                                 |          |                                                 |          |
| 0-49                                                                  | Reference                                       |          |                                                 |          |
| 50-54                                                                 | -0.408 (-0.658, -0.158)                         | 0.127    | -0.226 (-0.342, -0.109)                         | 0.059    |
| 55-59                                                                 | -0.504 (-0.726, -0.281)                         | 0.114    | -0.235 (-0.348, -0.122)                         | 0.058    |
| 60-64                                                                 | -0.525 (-0.735, -0.316)                         | 0.107    | -0.339 (-0.443, -0.236)                         | 0.053    |
| 65-69                                                                 | -0.580 (-0.784, -0.377)                         | 0.104    | -0.448 (-0.549, -0.347)                         | 0.051    |
| 70-74                                                                 | -0.713 (-0.913, -0.513)                         | 0.102    | -0.565 (-0.663, -0.467)                         | 0.050    |
| 75-79                                                                 | -0.820 (-1.019, -0.621)                         | 0.101    | -0.648 (-0.745, -0.552)                         | 0.049    |
| 80-84                                                                 | -0.938 (-1.137, -0.739)                         | 0.102    | -0.702 (-0.801, -0.603)                         | 0.051    |
| 85-89                                                                 | -1.074 (-1.276, -0.872)                         | 0.103    | -0.769 (-0.873, -0.665)                         | 0.053    |
| 90-max                                                                | -1.196 (-1.406, -0.986)                         | 0.107    | -0.932 (-1.051, -0.814)                         | 0.060    |

**Figure I. Average annual costs per patient hospitalised with AF by sector. Cost components with confidence interval are presented for each age group (alive at the end of the five-year follow-up period)**

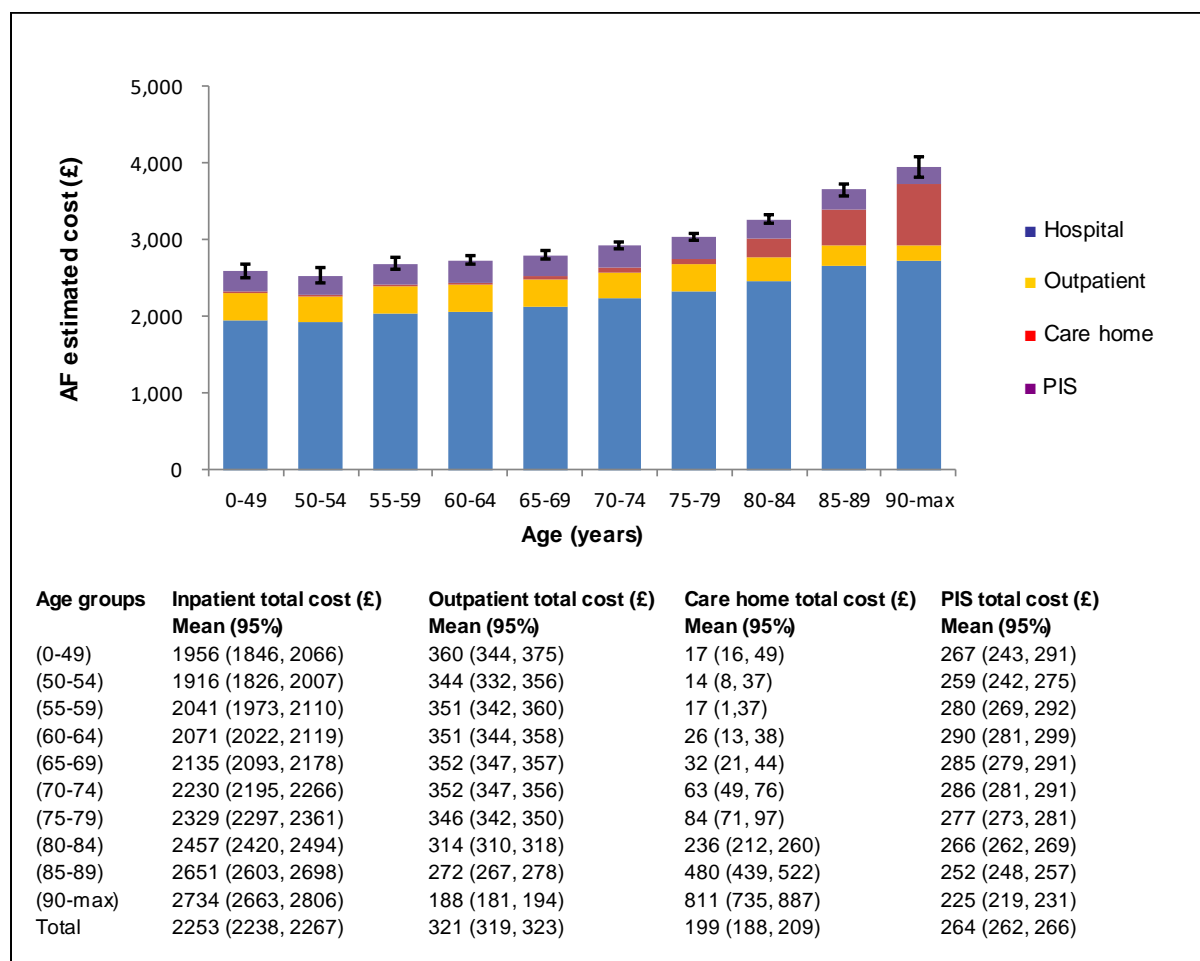

**Equation V. Probability of healthcare utilisation (dead at the end of the five-year follow-up period)**

$$\Pr(HCE_{it} > 0) = \alpha + \beta_1 \sum_{s=2}^{10} A_{it} + \beta_2 G_i + \beta_3 Y_i + \beta_4 \sum_{s=2}^5 S_i + \beta_5 \sum_{u=2}^8 U_i + \beta_6 \sum_{h=2}^{14} H_i + \beta_7 \sum_{c=2}^3 C_{it} + \left( \beta_8 \sum_{c=2}^3 C_{it} * \sum_{s=2}^{10} A_{it} \right)$$

Where: A is age at the time of admission (reference category: 0 -49 age group); G is sex (reference category: male); Y year of admission; S is SIMD quintile (reference category: most deprived quintile (1)); U is the urban/rural classification (reference category: large urban area); H is health board of inpatient admission (reference category: Greater Glasgow & Clyde); C is the Charlson comorbidity index (reference category: no comorbidities);  $u_i$  is the error term for patient  $i$  at time  $t$ .

Note: the model for care home does not include the 0 -49 and 50-54 age groups, as none of those patients incurred any cost related to care home.

**Table III. Regression interactions: probability of healthcare resources utilisation and cost estimation (dead at the end of the five-year follow-up period)**

| Covariates                                                            | Probability<br>(1 <sup>st</sup> modelling part) |          | Probability<br>(2 <sup>nd</sup> modelling part) |          |
|-----------------------------------------------------------------------|-------------------------------------------------|----------|-------------------------------------------------|----------|
|                                                                       | Coefficient (95% CI)                            | Std. Err | Coefficient (95% CI)                            | Std. Err |
| <b>Interaction: age (year) - Charlson score (1 comorbidity)</b>       |                                                 |          |                                                 |          |
| 0-49                                                                  | Reference                                       |          |                                                 |          |
| 50-54                                                                 | -0.057 (-0.456, 0.343)                          | 0.204    | 0.124 (-0.268, 0.515)                           | 0.200    |
| 55-59                                                                 | 0.130 (-0.207, 0.468)                           | 0.172    | 0.054 (-0.282, 0.389)                           | 0.171    |
| 60-64                                                                 | 0.083 (-0.223, 0.389)                           | 0.156    | -0.009 (-0.309, 0.291)                          | 0.153    |
| 65-69                                                                 | 0.028 (-0.263, 0.320)                           | 0.149    | -0.054 (-0.342, 0.234)                          | 0.147    |
| 70-74                                                                 | -0.006 (-0.290, 0.278)                          | 0.145    | -0.051 (-0.334, 0.232)                          | 0.144    |
| 75-79                                                                 | -0.078 (-0.358, 0.201)                          | 0.143    | 0.002 (-0.278, 0.282)                           | 0.143    |
| 80-84                                                                 | -0.200 (-0.478, 0.078)                          | 0.142    | -0.048 (-0.326, 0.230)                          | 0.142    |
| 85-89                                                                 | -0.160 (-0.437, 0.117)                          | 0.141    | -0.039 (-0.316, 0.239)                          | 0.142    |
| 90-max                                                                | -0.154 (-0.431, 0.123)                          | 0.141    | -0.079 (-0.358, 0.200)                          | 0.142    |
| <b>Interaction: age (year) - Charlson score (&gt;1 comorbidities)</b> |                                                 |          |                                                 |          |
| 0-49                                                                  | Reference                                       |          |                                                 |          |
| 50-54                                                                 | 0.000 (-0.340, 0.339)                           | 0.173    | 0.066 (-0.268, 0.400)                           | 0.170    |
| 55-59                                                                 | -0.147 (-0.436, 0.142)                          | 0.147    | 0.041 (-0.240, 0.322)                           | 0.143    |
| 60-64                                                                 | -0.135 (-0.398, 0.128)                          | 0.134    | -0.114 (-0.360, 0.132)                          | 0.126    |
| 65-69                                                                 | -0.215 (-0.466, 0.036)                          | 0.128    | -0.164 (-0.401, 0.074)                          | 0.121    |
| 70-74                                                                 | -0.192 (-0.436, 0.053)                          | 0.125    | -0.237 (-0.470, -0.005)                         | 0.119    |
| 75-79                                                                 | -0.311 (-0.553, -0.070)                         | 0.123    | -0.248 (-0.478, -0.018)                         | 0.117    |
| 80-84                                                                 | -0.443 (-0.683, -0.204)                         | 0.122    | -0.367 (-0.595, -0.139)                         | 0.116    |
| 85-89                                                                 | -0.394 (-0.633, -0.154)                         | 0.122    | -0.394 (-0.623, -0.166)                         | 0.116    |
| 90-max                                                                | -0.312 (-0.551, -0.073)                         | 0.122    | -0.483 (-0.713, -0.254)                         | 0.117    |

**Figure II. Average annual costs per patient hospitalised with AF by sector. Cost components with confidence interval are presented for each age group (dead at the end of the five-year follow-up period)**

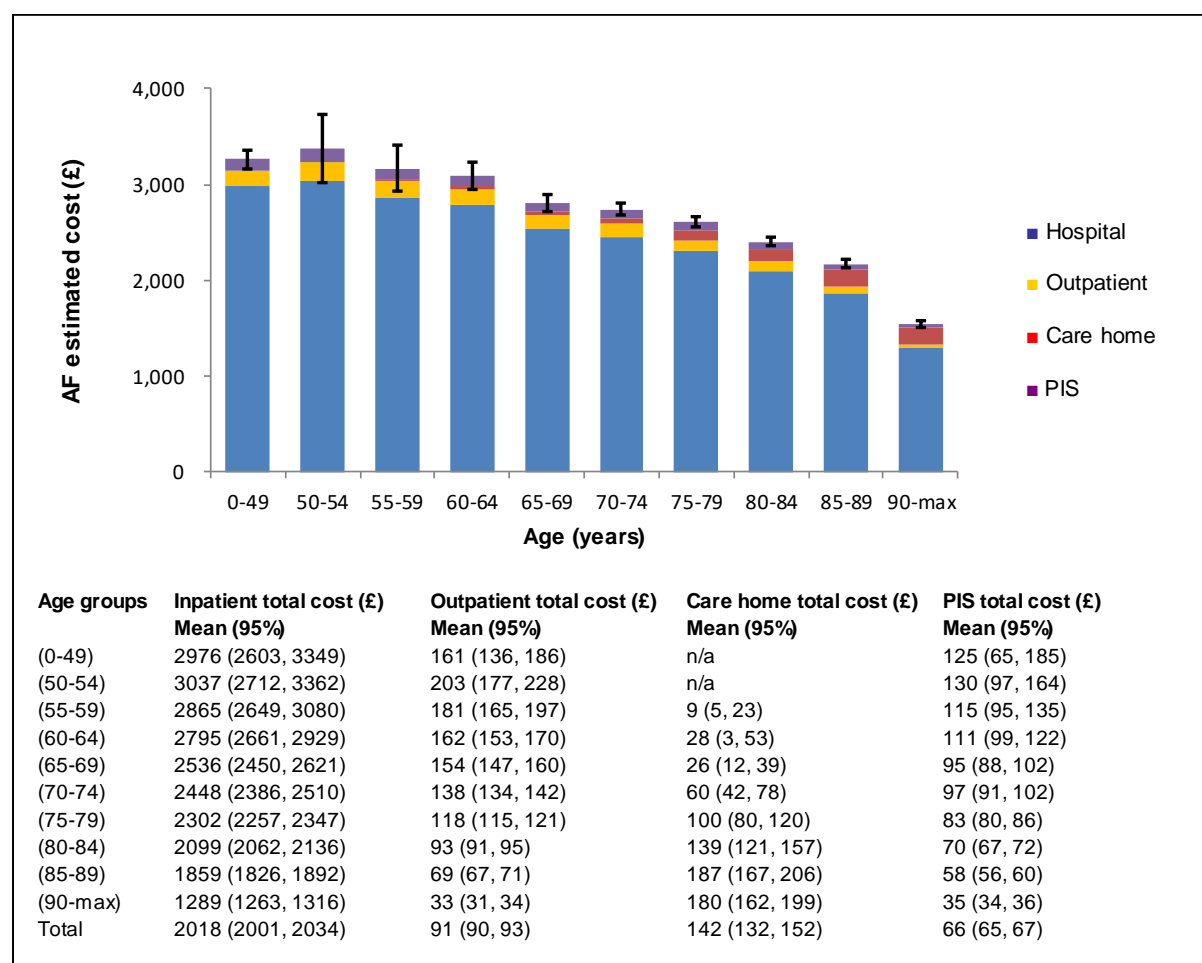

Note: the care home total cost estimation does not include the 0 -49 and 50-54 age groups, as none of those patients incurred any cost related to care home.

**STROBE 2007 (v4) Statement—Checklist of items that should be included in reports of *cohort studies***

| Section/Topic                | Item # | Recommendation                                                                                                                                                                       | Reported on page # |
|------------------------------|--------|--------------------------------------------------------------------------------------------------------------------------------------------------------------------------------------|--------------------|
| <b>Title and abstract</b>    | 1      | (a) Indicate the study's design with a commonly used term in the title or the abstract                                                                                               | 1                  |
|                              |        | (b) Provide in the abstract an informative and balanced summary of what was done and what was found                                                                                  | 1                  |
| <b>Introduction</b>          |        |                                                                                                                                                                                      |                    |
| Background/rationale         | 2      | Explain the scientific background and rationale for the investigation being reported                                                                                                 | 3                  |
| Objectives                   | 3      | State specific objectives, including any prespecified hypotheses                                                                                                                     | 3                  |
| <b>Methods</b>               |        |                                                                                                                                                                                      |                    |
| Study design                 | 4      | Present key elements of study design early in the paper                                                                                                                              | 4                  |
| Setting                      | 5      | Describe the setting, locations, and relevant dates, including periods of recruitment, exposure, follow-up, and data collection                                                      | 4                  |
| Participants                 | 6      | (a) Give the eligibility criteria, and the sources and methods of selection of participants. Describe methods of follow-up                                                           | 4                  |
|                              |        | (b) For matched studies, give matching criteria and number of exposed and unexposed                                                                                                  | n/a                |
| Variables                    | 7      | Clearly define all outcomes, exposures, predictors, potential confounders, and effect modifiers. Give diagnostic criteria, if applicable                                             | 7-8                |
| Data sources/<br>measurement | 8*     | For each variable of interest, give sources of data and details of methods of assessment (measurement). Describe comparability of assessment methods if there is more than one group | n/a                |
| Bias                         | 9      | Describe any efforts to address potential sources of bias                                                                                                                            | 7                  |
| Study size                   | 10     | Explain how the study size was arrived at                                                                                                                                            | 4                  |
| Quantitative variables       | 11     | Explain how quantitative variables were handled in the analyses. If applicable, describe which groupings were chosen and why                                                         | 7-8                |
| Statistical methods          | 12     | (a) Describe all statistical methods, including those used to control for confounding                                                                                                | 6-8                |
|                              |        | (b) Describe any methods used to examine subgroups and interactions                                                                                                                  | 6-7                |
|                              |        | (c) Explain how missing data were addressed                                                                                                                                          | n/a                |
|                              |        | (d) If applicable, explain how loss to follow-up was addressed                                                                                                                       | n/a                |
|                              |        | (e) Describe any sensitivity analyses                                                                                                                                                | n/a                |
| <b>Results</b>               |        |                                                                                                                                                                                      |                    |

|                          |     |                                                                                                                                                                                                                                                                                                                                                                                                               |                    |
|--------------------------|-----|---------------------------------------------------------------------------------------------------------------------------------------------------------------------------------------------------------------------------------------------------------------------------------------------------------------------------------------------------------------------------------------------------------------|--------------------|
| Participants             | 13* | (a) Report numbers of individuals at each stage of study—eg numbers potentially eligible, examined for eligibility, confirmed eligible, included in the study, completing follow-up, and analysed<br>(b) Give reasons for non-participation at each stage<br>(c) Consider use of a flow diagram                                                                                                               | n/a                |
| Descriptive data         | 14* | (a) Give characteristics of study participants (eg demographic, clinical, social) and information on exposures and potential confounders<br>(b) Indicate number of participants with missing data for each variable of interest<br>(c) Summarise follow-up time (eg, average and total amount)                                                                                                                | n/a                |
| Outcome data             | 15* | Report numbers of outcome events or summary measures over time                                                                                                                                                                                                                                                                                                                                                | n/a                |
| Main results             | 16  | (a) Give unadjusted estimates and, if applicable, confounder-adjusted estimates and their precision (eg, 95% confidence interval). Make clear which confounders were adjusted for and why they were included<br>(b) Report category boundaries when continuous variables were categorized<br>(c) If relevant, consider translating estimates of relative risk into absolute risk for a meaningful time period | 9-11<br>n/a<br>n/a |
| Other analyses           | 17  | Report other analyses done—eg analyses of subgroups and interactions, and sensitivity analyses                                                                                                                                                                                                                                                                                                                | 9                  |
| <b>Discussion</b>        |     |                                                                                                                                                                                                                                                                                                                                                                                                               |                    |
| Key results              | 18  | Summarise key results with reference to study objectives                                                                                                                                                                                                                                                                                                                                                      | 11                 |
| <b>Limitations</b>       |     |                                                                                                                                                                                                                                                                                                                                                                                                               |                    |
| Interpretation           | 20  | Give a cautious overall interpretation of results considering objectives, limitations, multiplicity of analyses, results from similar studies, and other relevant evidence                                                                                                                                                                                                                                    | 12-14              |
| Generalisability         | 21  | Discuss the generalisability (external validity) of the study results                                                                                                                                                                                                                                                                                                                                         | 14                 |
| <b>Other information</b> |     |                                                                                                                                                                                                                                                                                                                                                                                                               |                    |
| Funding                  | 22  | Give the source of funding and the role of the funders for the present study and, if applicable, for the original study on which the present article is based                                                                                                                                                                                                                                                 | 15                 |

\*Give information separately for cases and controls in case-control studies and, if applicable, for exposed and unexposed groups in cohort and cross-sectional studies.

**Note:** An Explanation and Elaboration article discusses each checklist item and gives methodological background and published examples of transparent reporting. The STROBE checklist is best used in conjunction with this article (freely available on the Web sites of PLoS Medicine at <http://www.plosmedicine.org/>, Annals of Internal Medicine at <http://www.annals.org/>, and Epidemiology at <http://www.epidem.com/>). Information on the STROBE Initiative is available at [www.strobe-statement.org](http://www.strobe-statement.org).



# BMJ Open

## A Two-Part Model to estimate Inpatient, Outpatient, Prescribing and Care Home Costs associated with Atrial Fibrillation in Scotland

|                                 |                                                                                                                                                                                                                                                                                                                                                                                                                                  |
|---------------------------------|----------------------------------------------------------------------------------------------------------------------------------------------------------------------------------------------------------------------------------------------------------------------------------------------------------------------------------------------------------------------------------------------------------------------------------|
| Journal:                        | <i>BMJ Open</i>                                                                                                                                                                                                                                                                                                                                                                                                                  |
| Manuscript ID                   | bmjopen-2018-028575.R3                                                                                                                                                                                                                                                                                                                                                                                                           |
| Article Type:                   | Original research                                                                                                                                                                                                                                                                                                                                                                                                                |
| Date Submitted by the Author:   | 16-Dec-2019                                                                                                                                                                                                                                                                                                                                                                                                                      |
| Complete List of Authors:       | Ciminata, Giorgio; University of Glasgow Institute of Health and Wellbeing, Health Economics and Health Technology Assessment (HEHTA)<br>Geue, Claudia; University of Glasgow, Health Economics and Health Technology Assessment (HEHTA)<br>Langhorne, Peter; University of Glasgow, Institute of Cardiovascular and Medical Sciences<br>Wu, O; University of Glasgow, Health Economics and Health Technology Assessment (HEHTA) |
| <b>Primary Subject Heading</b>: | Health economics                                                                                                                                                                                                                                                                                                                                                                                                                 |
| Secondary Subject Heading:      | Cardiovascular medicine                                                                                                                                                                                                                                                                                                                                                                                                          |
| Keywords:                       | HEALTH ECONOMICS, Atrial Fibrillation, Stroke < NEUROLOGY, Cost Analysis                                                                                                                                                                                                                                                                                                                                                         |
|                                 |                                                                                                                                                                                                                                                                                                                                                                                                                                  |

SCHOLARONE™  
Manuscripts



I, the Submitting Author has the right to grant and does grant on behalf of all authors of the Work (as defined in the below author licence), an exclusive licence and/or a non-exclusive licence for contributions from authors who are: i) UK Crown employees; ii) where BMJ has agreed a CC-BY licence shall apply, and/or iii) in accordance with the terms applicable for US Federal Government officers or employees acting as part of their official duties; on a worldwide, perpetual, irrevocable, royalty-free basis to BMJ Publishing Group Ltd ("BMJ") its licensees and where the relevant Journal is co-owned by BMJ to the co-owners of the Journal, to publish the Work in this journal and any other BMJ products and to exploit all rights, as set out in our [licence](#).

The Submitting Author accepts and understands that any supply made under these terms is made by BMJ to the Submitting Author unless you are acting as an employee on behalf of your employer or a postgraduate student of an affiliated institution which is paying any applicable article publishing charge ("APC") for Open Access articles. Where the Submitting Author wishes to make the Work available on an Open Access basis (and intends to pay the relevant APC), the terms of reuse of such Open Access shall be governed by a Creative Commons licence – details of these licences and which [Creative Commons](#) licence will apply to this Work are set out in our licence referred to above.

Other than as permitted in any relevant BMJ Author's Self Archiving Policies, I confirm this Work has not been accepted for publication elsewhere, is not being considered for publication elsewhere and does not duplicate material already published. I confirm all authors consent to publication of this Work and authorise the granting of this licence.

1  
2  
3 **A Two-Part Model to estimate Inpatient, Outpatient, Prescribing and Care Home Costs**  
4 **associated with Atrial Fibrillation in Scotland.**  
5  
6  
7

8  
9 **Authors:** Ciminata G (Research Assistant)<sup>1</sup>, Geue C (Lecturer in Health Economics)<sup>1</sup>,  
10 Langhorne P (Professor of Stroke Care)<sup>2</sup>, Wu O (Professor of Health Technology  
11 Assessment)<sup>1</sup>.  
12  
13

- 14  
15 1. Health Economics and Health Technology Assessment (HEHTA), Institute of Health &  
16 Wellbeing, University of Glasgow, Glasgow G12 8RZ, UK  
17 2. Institute of Cardiovascular & Medical Sciences, University of Glasgow, Glasgow G31  
18 2ER, UK  
19  
20  
21

22 Corresponding author:

23 Mr Giorgio Ciminata (MSc), [g.ciminata.1@research.gla.ac.uk](mailto:g.ciminata.1@research.gla.ac.uk)  
24  
25  
26

27 Cover title: Inpatient, Outpatient, Prescribing and Care Home Costs associated with Atrial  
28 Fibrillation  
29

30 Total number of tables and figures: Figures: 2, Tables: 5  
31  
32

33 Subject terms: Atrial Fibrillation  
34

35 Key words: Atrial Fibrillation, Stroke, cost analysis  
36  
37

38 Word count: 3753  
39  
40  
41  
42  
43  
44  
45  
46  
47  
48  
49  
50  
51  
52  
53  
54  
55  
56  
57  
58  
59  
60

## Abstract

**Objective:** To estimate global inpatient, outpatient, prescribing and care-home costs for atrial fibrillation (AF) patients, using population-based, individual-level linked data.

**Design:** A two-part model was employed to estimate the probability of resource utilisation and costs conditional on positive utilisation using individual-level linked data.

**Settings:** Scotland, five years following first hospitalisation for AF between 1997 and 2015.

**Participants:** Patients hospitalised with a known diagnosis of AF or atrial flutter.

**Primary and secondary outcome measures:** Inpatient, outpatient, prescribing and care home costs.

**Results:** The mean annual cost for an AF patient was estimated at £3785 (95% CI £3767-£3804). Inpatient admissions and outpatient visits accounted for 79% and 8% of total costs, respectively; prescriptions and care home stay accounted for 7% and 6% of total costs. Inpatient cost was the main driver across all age groups. While inpatient cost contributions (~80%) were constant between 0 and 84 years, they decreased for patients over 85 years. This is offset by increasing care-home cost contributions. Mean annual costs associated with AF increased significantly with increasing number of comorbidities.

**Conclusion:** This study used a contemporary and representative cohort, and a comprehensive approach to estimate global costs associated with AF, taking into account resource utilisation beyond hospital care. While overall costs, considerably affected by comorbidity, did not increase with increasing age, care-home costs increased proportionally with age. Inpatient admission was the main contributor to the overall financial burden of AF, highlighting the need for improved mechanisms of early diagnosis to prevent hospitalisations.

## Article summary

### Strengths and limitations of this study

- Costs are estimated through an incidence-based approach using patient-level morbidity records.
- Sufficient follow-up time is used to capture all relevant global costs to generate a contemporary estimate of health and care home costs related to AF.
- Scotland offers a robust record linkage system, where administrative patient-level health data are routinely collected.
- Data on primary care consultations were not available for linkage at a national level, however the impact this might have on overall costs is expected to be small.
- The potential risk of AF going undiagnosed and clinical miscoding of morbidity records may lead to an underestimation of the AF cohort and associated costs.

## Introduction

Atrial Fibrillation (AF) is the most common form of arrhythmia. In Scotland AF affects 1.8% of the adult population, and rises to 6% among those aged 65 years or over [1]. In an ageing population, AF has a substantial impact on the economic burden of the healthcare system.

A number of cost analyses on estimating the economic burden of AF exist. The majority of these studies used various definition of the AF study population, based on data sourced from administrative database [2-4], health insurance databases [2, 5-7], hospital records [8, 9] and surveys [10]. Direct medical costs related to inpatient admissions, outpatient visits, as well as prescriptions have been included in these estimates; [2-10] indirect costs related to loss of productivity have been estimated among patients who were at working ages [6, 7].

There is a lack of generalisable studies based on large national population datasets that examine the total and the distribution of costs associated with AF [11]. The aim of this study was to quantify the inpatient, outpatient, prescribing and care home costs associated with AF over a five-year period. Using record-linkage of national datasets from Scotland, we also examined the distribution of costs that are attributable to AF.

## Methods

Cost analyses or cost of illness studies typically adopt either the prevalence or incidence based approaches [12]. In the context of AF, the prevalence-based approach determines costs attributable to all cases of AF in a given year, while the incidence-based approach determines costs of new cases of AF in a given time period. In the present study, costs were estimated with an incidence-based approach. A further distinction between costing analyses is between the medicalized and the global comprehensive approaches.

1  
2  
3 In the first case, only expenditures directly attributable to a particular disease are used for  
4  
5 estimating the overall costs. While the medicalized approach can be used to identify highly  
6  
7 specific expenditures, it may also lead to underestimation or overestimation of the economic  
8  
9 burden of a given disease; this may happen when cost estimation is not adequately adjusted for  
10  
11 confounders highly correlated with the disease of interest. Conversely, the global  
12  
13 comprehensive approach, used in this analysis, includes all the expenditures incurred by a  
14  
15 population with a particular disease [13]. These expenditures are not necessarily related to the  
16  
17 disease of interest; for instance, expenditures related to orthopaedics surgery or cancer  
18  
19 treatment incurred by a patient with AF, will count towards the global comprehensive cost of  
20  
21 AF.  
22  
23  
24  
25  
26  
27

## 28 **Data**

29  
30 Data were obtained from the Information Services Division (ISD) of NHS Scotland as part of  
31  
32 a wider project that used routinely collected data to evaluate clinical effectiveness and cost-  
33  
34 effectiveness of Direct Oral Anticoagulants (DOACs) in the prevention of stroke in the AF  
35  
36 population. Inpatient records for patients with a diagnosis of AF or atrial flutter between 1997  
37  
38 and 2015 were extracted from the General Acute Inpatient and Day Case Scottish Morbidity  
39  
40 Records 01 (SMR01). These records contain all general acute admissions, categorized as  
41  
42 inpatients or day cases, discharged from non-obstetric and non-psychiatric specialties [14].  
43  
44 Incident AF events (ICD10 code I48) were identified using all six diagnostic positions in  
45  
46 SMR01, with a look back period of five years to minimise double counting. After checking for  
47  
48 data entry errors and removal of duplicate records, the final AF cohort consisting of 278,286  
49  
50 individuals hospitalised with a diagnosis of AF or atrial flutter was identified.  
51  
52  
53  
54  
55  
56  
57  
58  
59  
60

1  
2  
3 Individual-level data linkage was then carried out with outpatient clinic attendance (Outpatient  
4 Attendance Scottish Morbidity Records 00; SMR00), the prescribing information system (PIS),  
5  
6 care home census and mortality records (National Records for Scotland, NRS). Records from  
7  
8 SMR00 include information on new and follow up outpatient appointments for any clinical  
9  
10 specialty [15]. The PIS database includes prescribing records for all medicines and their  
11  
12 associated costs, which are prescribed and dispensed by community pharmacies, dispensing  
13  
14 doctors and a small number of specialist appliance suppliers [16]. The quality of PIS data is  
15  
16 guaranteed by an electronic data capture, and it passes several stages of quality control before  
17  
18 and after data are submitted [17]. The care home census combines the former Residential Care  
19  
20 Home Census (run by the Scottish Government) and the Private Nursing Homes Census (run  
21  
22 by ISD Scotland). Items reported in the care home census include discharge dates to care home  
23  
24 residency such as NHS and private nursing homes, as well as an indication on whether nursing  
25  
26 care is required [16].  
27  
28  
29  
30  
31  
32  
33  
34

35 Patients were followed up for five years following incident AF event in terms of their  
36  
37 healthcare resource use, care home admissions and mortality. Since AF is often a precursor of  
38  
39 stroke and cardiovascular conditions, an estimation of costs for a period of five years post AF  
40  
41 event would allow us to fully capture costs associated with an AF patient.  
42  
43  
44  
45  
46

### 47 **Costing**

48  
49 Inpatient care costs were obtained from the latest (2013/2014) Scottish National Tariff (SNT),  
50  
51 a list of standard average prices based on Healthcare Resource Groups (HRGs) [17, 18]. The  
52  
53 SNT uses HRG4 for grouping clinically similar treatments that use similar levels of healthcare  
54  
55 resources. After defining a total cost per episode, the total cost for a continuous inpatient stay  
56  
57 (CIS) was calculated.  
58  
59  
60



1  
2  
3 A CIS describes the entire duration of an inpatient stay from the date of admission to the date  
4 of discharge and can consist of several episodes in different specialties. Since the SNT is based  
5 on spells of care (inpatient stay within the same specialty) rather than individual inpatient  
6 episodes or a CIS, a CIS was partitioned into spells when a change in specialty occurred [17].  
7  
8 If within a CIS, two or more episodes were in the same specialty, only the highest incurred cost  
9 was taken into account, and the remaining episodes were replaced with a zero cost. Outpatient  
10 costs were obtained by assigning outpatient specialty costs, to outpatient attendances [17]. Unit  
11 costs were specific to whether the outpatient attendance took place at a consultant or nurse led  
12 clinic [15].  
13  
14  
15  
16  
17  
18  
19  
20  
21  
22  
23  
24  
25

26 The cost of each prescription dispensed per patient was obtained from PIS [19]. Firstly, the  
27 price per unit was obtained by dividing the item price by the pack size. Secondly, the total  
28 number of items dispensed was obtained by multiplying the number of items dispensed by the  
29 number of instalments. Care home costs, obtained from the care home census, were based on  
30 length of stay or residency. Care home residency was established from care home census  
31 records, reporting admission to a care home like structure [16]. An average of care home  
32 charges for long stay residents was calculated using information on whether nursing care was  
33 provided or not. The average weekly care home charge was expressed per day, so that only the  
34 effective days spent in a care home were costed. The tariffs used for costing account for  
35 inflation, therefore further cost adjustment was not needed.  
36  
37  
38  
39  
40  
41  
42  
43  
44  
45  
46  
47  
48  
49  
50

### 51 **Econometric model**

52 Healthcare expenditure data are typically characterised by: i) a significant proportion of zero-  
53 cost observations for individuals who have not utilised any healthcare resources in a given time  
54 period, and ii) a skewed distribution for positive costs. A two-part model was used [20, 21].  
55  
56  
57  
58  
59  
60

1  
2  
3 In the first part of the model, the probability of using a healthcare service in a given time period  
4 was estimated using a probit model (Equation I, please see online supplement). The same  
5 explanatory variables were used in the second part of the model, with a gamma distribution  
6 and log link, estimating costs conditional on having incurred positive costs (Equation II, please  
7 see online supplement). Mean costs per patient per year following their incident AF event were  
8 calculated by multiplying first and second modelling part (Equation III, please see online  
9 supplement).

10  
11  
12 In order to account for the skewed nature of cost data, generalised linear models (GLMs) were  
13 used. These were compared against ordinary least squares regression (OLS) and log  
14 transformed OLS by means of the Akaike Information Criterion (AIC), which measures  
15 goodness of fit. When comparing the different models, GLM reported the lowest AIC  
16 indicating the best fit for the given set of data. A user-written STATA programme  
17 “glmldiagnostic.do” [20], performing four different tests simultaneously, was used to identify  
18 the most appropriate distributional family and link function.

### 19 20 21 **Econometric model covariates**

22 The two-part model adjusted for age, sex, year of inpatient admission, socio-economic status,  
23 urban-rural classification, health board, comorbidities and mortality. These covariates are  
24 considered to be the main confounders that have an effect on costs incurred by an AF  
25 population. We controlled for age because AF and associated comorbidities are age-related  
26 conditions, and may have an impact on the overall costs. We also assumed costs to vary  
27 between males and females, in particular those for care home residency. Variation in healthcare  
28 utilisation and associated costs and care home residency by socio-economic status is controlled  
29 for using the Scottish Index of Multiple Deprivation (SIMD).

1  
2  
3 The SIMD reflects areas of multiple deprivation ranked from the most to the least deprived and  
4 expressed as quintiles where the most and the least deprived areas are represented by 1 and 5  
5 respectively [22]. In Scotland, there are 14 regional health boards responsible for the provision  
6 of healthcare [23]. Hence, potential differences in healthcare utilisation and prescribing costs,  
7 may reflect variation in clinical practice and prescribing behaviour rather than the ability of  
8 patients to access care. Patients living in urban areas may have easier access to care compared  
9 to patients living in more remote areas, which is controlled for including the 8-fold  
10 classification measuring rurality [24].  
11  
12  
13  
14  
15  
16  
17  
18  
19  
20  
21  
22  
23

24 Patients with one or more comorbidities are expected to incur significantly higher costs than  
25 those with none. We accounted for this by including the Charlson comorbidity index, where 1  
26 indicates the absence of comorbidities, 2 the presence of only a single comorbidity and 3 the  
27 presence of more than one comorbidity [25]. Two interaction terms between age and  
28 comorbidities, and mortality and SIMD were included in the econometric model. Intuitively, a  
29 relationship of direct proportionality between age and comorbidities suggests that the level of  
30 comorbidities increases, as patients get older. Similarly, the socio-economic status may  
31 significantly influence the rate of socio-economic inequalities in mortality [26].  
32  
33  
34  
35  
36  
37  
38  
39  
40  
41  
42  
43  
44  
45

### 46 **Sensitivity analyses**

47 In order to ascertain whether mortality had an impact on overall AF related healthcare costs,  
48 average annual cost per patient by age and for each health or care home sector, was estimated  
49 for patients who were alive and those who were dead at the end of the five-year follow-up  
50 period. The two econometric models (Equation IV and V, please see online TABLEent)  
51 followed the same structure of the model described in the previous section and used for the  
52 main analysis; however, those models were not adjusted for mortality.  
53  
54  
55  
56  
57  
58  
59  
60

### Ethics statement

No ethics approval was sought as this study does not require consenting/contacting patients directly. All data used by researchers is pseudonymised, data reported is aggregated to minimise risk of identification and output clearance is required.

### Patients and public involvement

There was no patients or public involvement

## Results

### Cohort characteristics

Of the 278,286 AF patients with a mean age of 74 years (SD 12.5), the majority were identified in the two largest urban health board areas (Greater Glasgow & Clyde and Lothian), accounting for 22.2% and 14.8% respectively. This is also reflected in our categorisation of geographical areas, where large urban represented 38.4% and other urban areas represented 29.7% of the total AF cohort. Greater proportion of patients live in areas belonging to the most deprived quintile compared with those living in the least deprived areas – SIMD quintile 1 and quintile 5 representing 22.5% and 16.6% of the AF cohort respectively (Table1).

### Econometric modelling results

Regression results for both modelling parts are presented in Table 2. Overall, an inversely U-shaped association between age and the likelihood of utilising any health or social care services was observed – a gradual increment in the likelihood in resource use with advancing age up to 80 years, when compared with the reference group (0-49 years), while patients 80 years or older showing a decreased probability of utilising healthcare services. However, this association was not observed in the second modelling part model, estimating costs conditional

1  
2  
3 on having incurred positive costs, where a statistically significant gradient between age and  
4 costs indicated increasing costs as the cohort ages.  
5  
6

7  
8 The use of health or social care services and associated costs also increased significantly for  
9 patients living in the most deprived areas, when compared with patients living in areas with the  
10 lowest level of deprivation. The effect of socio-economic status on healthcare utilisation was  
11 also measured for those who are alive at the end of the five-year follow-up period through an  
12 interaction term between SIMD and mortality, but no statistically significant effect was found.  
13 Full details of regression results for interaction terms are presented in the supplementary online  
14 material (Table I, please see online supplement).  
15  
16  
17  
18  
19  
20  
21  
22  
23  
24  
25

26 For patients with comorbidities, the probabilities of utilising healthcare services were greater  
27 than the probability for those with no comorbidities. Although healthcare utilisation increased  
28 with the number of comorbidities, the interaction term between age and comorbidities indicated  
29 that as patients get older the use of healthcare services on average is lower for patients with  
30 one or more comorbidities than those with none. The decrease in healthcare utilisation by age  
31 is more pronounced in patients with more comorbidities than in those with only one  
32 comorbidity. The difference in healthcare costs between comorbidity categories indicated that  
33 in the presence of one or more comorbidities, on average healthcare costs decrease as patients  
34 get older. Full details of regression results for patients who were alive and those who were dead  
35 at the end of the five-year follow-up period are presented in Table 3 and Table 4 respectively,  
36 while regression results for interaction terms are presented in the supplementary online material  
37 (Table II and Table III, please see online supplement).  
38  
39  
40  
41  
42  
43  
44  
45  
46  
47  
48  
49  
50  
51  
52  
53  
54  
55  
56  
57

## 58 **Cost estimates**

59  
60

1  
2  
3 The estimated mean annual cost per AF patient was £3785 (95% CI: £3767-£3804). The  
4  
5 estimated total costs and distribution of costs according to sex are shown in Table 5.  
6

7  
8 While there is little difference between the total costs and the distribution of costs for inpatient,  
9  
10 outpatient and prescription costs, the difference seems more pronounced when comparing the  
11  
12 care home component of costs (5% of total costs among males vs 7% of total costs among  
13  
14 females).  
15

16  
17  
18  
19 The average annual cost per AF patient by age and for each health or care home sector is shown  
20  
21 in Figure 1. Considering the individual contribution of each cost component to the overall costs,  
22  
23 inpatient costs was the main driver across all age groups. While inpatient cost contribution  
24  
25 remained constant with an average contribution of about 80% to the overall costs for patients  
26  
27 aged between 0 and 84 years, it decreased for patients over 85 years of age. Similar patterns  
28  
29 were observed for outpatient and prescribing costs. On the contrary, the contribution of care  
30  
31 home costs to the overall costs increased with age (0.5% for patients aged 0-49 years and  
32  
33 approximately 11% for patients who are 90 years or older). The contribution of each setting to  
34  
35 the total health and care home costs by the number of existing comorbidities is illustrated in  
36  
37 Figure 2. While inpatient and total costs vary considerably with the number of comorbidities,  
38  
39 outpatient and care home contributions remain fairly constant.  
40  
41  
42  
43  
44  
45  
46

47 The estimated mean annual cost per AF patient alive at the end of the five-year follow-up  
48  
49 period was £3047 (95% CI: £3027-£3067). The average annual cost per AF patient by age and  
50  
51 for each health or care home sector is presented in the supplementary online material (Figure  
52  
53 I, please see online supplement). For these patients, inpatient cost was the main driver across  
54  
55 all age groups; a gradient between age and costs indicated increasing costs as the cohort ages.  
56  
57  
58  
59  
60

1  
2  
3 Similar patterns were observed for care home costs. On the contrary, outpatient and prescribing  
4 costs remained constant up to 74 years, but decreased slightly for older patients.  
5  
6  
7  
8  
9

10 The estimated mean annual cost per AF patient who died during the five-year follow-up period,  
11 was £2304 (95% CI: £2284-£2324) (Figure II, please see online supplement). For these  
12 patients, inpatient cost was the main driver across all age groups; a gradient between age and  
13 costs indicated decreasing costs as the cohort ages. This was also observed for outpatient and  
14 prescribing costs; but care home costs on average increased across age groups.  
15  
16  
17  
18  
19  
20  
21  
22

## 23 **Discussion**

24 A greater proportion of AF patients were found in areas with the highest index of deprivation.  
25 This, combined with the likelihood for people living in the most deprived quintile having longer  
26 inpatient stays due to a lack of support at home, may explain the difference in inpatient care  
27 utilisation between patients from the most and the least deprived areas, with associated costs  
28 being higher for the former group. As AF is more likely to affect the elderly, so that costs were  
29 expected to increase with age. As health deteriorates with age, older age groups are assumed  
30 to make greater use of healthcare services, and therefore incur higher costs than younger age  
31 groups. However, age was found to have a modest impact on overall healthcare costs, being  
32 fairly consistent across age groups. This finding is in line with existing evidence indicating that  
33 healthcare expenditure depends not only on patients' calendar age, but is also significantly  
34 associated with remaining lifetime [27].  
35  
36  
37  
38  
39  
40  
41  
42  
43  
44  
45  
46  
47  
48  
49  
50  
51

52 Any observed correlation between healthcare expenditure and age may therefore be attributable  
53 to the fact that the proportion of patients who are at the end of their lives is substantially greater  
54 in older rather than younger age groups [27]. On the other hand, comorbidity had a considerable  
55  
56  
57  
58  
59  
60

1  
2  
3 effect on the overall costs, increasing significantly in patients with more than one comorbidity.  
4  
5 However, the decrease in healthcare utilisation by age is more pronounced in patients with  
6  
7 more comorbidities than in those with only one comorbidity.  
8  
9

10 Decreasing inpatient and outpatient costs for the oldest patients were offset by increasing care  
11  
12 home costs, in particular for women. Indeed, the main cause for higher overall costs incurred  
13  
14 by women is attributable to the higher likelihood for elderly women to reside in care homes.  
15

16 Interestingly, care home contribution to the overall costs was noticeably lower for patients with  
17  
18 multiple comorbidities than for those with none or one comorbidity. This may suggest that  
19  
20 sicker patients are more likely to be in hospital than in a care home.  
21  
22  
23  
24  
25

26 To date, only one single study published in 2004 has estimated the cost of AF in Scotland; the  
27  
28 authors estimated the cost of AF in 1995/1996 with the medicalised approach , and projected  
29  
30 these to the year 2000 [28]. Previous work has focussed on a 12-months follow-up, which  
31  
32 seems limited in order to capture all healthcare resource utilisation for AF patients. Our study  
33  
34 offers a longer follow-up and a contemporary estimate of healthcare costs related to AF  
35  
36 including all relevant care settings. Our study offers a distinct advantage over previous work  
37  
38 as costs, rather than being based on extrapolated rates using a prevalence-based approach [28],  
39  
40 are estimated with an incidence-based method using patient-level morbidity records. Using an  
41  
42 incidence based approach to costing and a broad perspective to capture the majority of costs  
43  
44 associated with AF, several routinely collected administrative datasets from Scotland were  
45  
46 combined, including care home utilisation.  
47  
48  
49  
50  
51  
52  
53

54 Existing studies, including ours, regardless of econometric model choice and covariates used,  
55  
56 show that costs due to inpatient admission are the main contributor to overall AF related  
57  
58 healthcare cost. This is a pertinent finding that may well support future policies on  
59  
60



1  
2  
3 opportunistic screening in the population at risk of AF, and in particular in Scotland where 1  
4  
5 in 3 patients with AF are currently undiagnosed [29].  
6  
7  
8  
9

10 The European AF management guidelines and the Scottish Cross-Party Group ‘Heart Disease  
11 and Stroke’, recently recommended that people who are 65 years or older and at risk of AF and  
12 associated comorbidities such as cardiovascular disease, diabetes or respiratory disease should  
13 be screened opportunistically in primary care, pharmacies or community settings [29, 30]. With  
14 rigorous screening and appropriate treatment, hospitalisations could be avoided and costs  
15 reduced.  
16  
17  
18  
19  
20  
21  
22

23  
24  
25  
26 Although we have captured most healthcare sectors and related costs, we were not able to  
27 obtain national data on primary care consultations, as these data are currently not routinely  
28 available for linkage in Scotland. Not capturing these data, may lead to an underestimation of  
29 the size of the AF cohort and associated costs. However, the costs associated with primary care  
30 consultations is expected to have a limited impact on the overall total AF related costs. Such  
31 underestimation could also result from AF going undiagnosed and clinical miscoding of  
32 morbidity records. Nevertheless, by using a cohort of patients hospitalised with AF we were  
33 able to capture more severe cases of AF. Prescribing and care home data were only available  
34 respectively from 2009 to 2012, their contribution to overall AF related costs might also be  
35 underestimated. Other limitations are inherent to the nature of administrative data, such as  
36 missing records or incomplete data.  
37  
38  
39  
40  
41  
42  
43  
44  
45  
46  
47  
48  
49  
50  
51

52  
53  
54 Further, we acknowledge the issue concerning attributing AF related costs to patients with a  
55 structural heart disease, as AF may manifest subsequently because of this. In our analysis, we  
56 identified about 14% of AF patients with a structural heart disease; these were patients with  
57  
58  
59  
60

1  
2  
3 systolic dysfunction, valvular heart disease or heart valve replacement. However, from the  
4  
5 hospital data it was not possible to establish causation between structural heart disease and AF.  
6  
7

8  
9  
10 In addition, this is likely to have a marginal impact on our conclusions, as the global  
11  
12 comprehensive approach used in this study include expenditures that are not necessarily related  
13  
14 to AF.  
15

16  
17  
18 We also acknowledge that specifying whether patients had received cardiovascular procedures  
19  
20 (e.g. cardioversion, echocardiograms and angiograms) would improve the accuracy of our cost  
21  
22 estimation, as it would indicate whether costs should be attributable to AF or other forms of  
23  
24 structural heart disease. However, this information is not currently available in our routinely  
25  
26 collected data of hospital admissions.  
27  
28  
29

30  
31  
32  
33 Recognising these limitations, we were nevertheless able to harness high quality patient-level  
34  
35 linked data to identify a cohort of AF patients and to estimate their associated healthcare  
36  
37 utilisation and costs in Scotland.  
38  
39

40  
41  
42 The inclusion of all available cost components is crucial for establishing overall costs, as these  
43  
44 often extend beyond hospitalisation. The study identifies hospitalisation as the main cost driver  
45  
46 and suggests that the implementation of AF screening policies could substantially reduce AF  
47  
48 related health care costs. Most importantly, the study concludes that patient's age has a limited  
49  
50 impact on the overall AF related cost, and therefore may contribute much less to future growth  
51  
52 of AF related cost in an ever-ageing Scottish population.  
53  
54  
55  
56  
57  
58  
59  
60

1  
2  
3 Future work will be able to utilise Scottish Stroke Care Audit (SSCA) records, allowing for the  
4 identification of additional AF patients; these are patients hospitalised with a stroke, where AF  
5 has been recorded in audit data as an underlying comorbidity.  
6  
7

8  
9  
10 Being able to complement inpatient records with SSCA records will allow us to capture more  
11 AF patients in Scotland. Moreover, future research may be able to include indirect costs  
12 associated with productivity-loss by linking morbidity and prescribing data to national data  
13 from the Department for Work and Pensions, for instance.  
14  
15  
16  
17  
18  
19  
20  
21  
22  
23  
24  
25  
26  
27  
28  
29  
30  
31  
32  
33  
34  
35  
36  
37  
38  
39  
40  
41  
42  
43  
44  
45  
46  
47  
48  
49  
50  
51  
52  
53  
54  
55  
56  
57  
58  
59  
60

1  
2  
3  
4  
5  
6  
7  
8  
9  
10  
11  
12  
13  
14  
15  
16  
17  
18  
19  
20  
21  
22  
23  
24  
25  
26  
27  
28  
29  
30  
31  
32  
33  
34  
35  
36  
37  
38  
39  
40  
41  
42  
43  
44  
45  
46  
47  
48  
49  
50  
51  
52  
53  
54  
55  
56  
57  
58  
59  
60

**Acknowledgements:** We thank the members of the Information Services Division, National Services Scotland, for their support. We acknowledge the support from The Farr Institute @ Scotland. The Farr Institute @ Scotland is supported by a 10-funder consortium: Arthritis Research UK, the British Heart Foundation, Cancer Research UK, the Economic and Social Research Council, the Engineering and Physical Sciences Research Council, the Medical Research Council, the National Institute of Health Research, the National Institute for Social Care and Health Research (Welsh Assembly Government), the Chief Scientist Office (Scottish Government Health Directorates), the Wellcome Trust (MRC Grant No: MR/K007017/1).

**Author contributions:** GC, CG, PL and OW conceived the article. GC carried out the statistical analysis and prepared the first draft of the manuscript. GC, CG, PL and OW contributed to editing the manuscript and approved the final version submitted for publication.

**Funding sources:** This work was supported by Farr Institute for Health Informatics Research, Scotland, MRC, grant number MR/K007017/1

**Competing interest:** The authors declare no conflict of interest.

**Data Statement:** All data underlying the analyses are confidential and subject to disclosure control. Data can only be obtained through application to Information Services Division (ISD) via the Public Benefit and Privacy Panel (PBPP).

## References

1. Heath Improvement Scotland. *Prevention of stroke in patients with atrial fibrillation*. 2013 [cited 2016 January 2016]; Available from: [http://www.sign.ac.uk/assets/af\\_publication.pdf](http://www.sign.ac.uk/assets/af_publication.pdf).
2. Bennell, M.C., et al., *Identifying predictors of cumulative healthcare costs in incident atrial fibrillation: a population-based study*. J Am Heart Assoc, 2015. **4**(4).
3. Hallinen, T., et al., *Direct costs of warfarin treatment among patients with atrial fibrillation in a Finnish health care setting*. Curr Med Res Opin, 2006. **22**(4): p. 683-92.
4. Nelson, W.W., et al., *Out-of-range international normalized ratio values and healthcare cost among new warfarin patients with non-valvular atrial fibrillation*. J Med Econ, 2015. **18**(5): p. 333-40.
5. Ghate, S.R., et al., *All-cause and bleeding-related health care costs in warfarin-treated patients with atrial fibrillation*. J Manag Care Pharm, 2011. **17**(9): p. 672-84.
6. Rohrbacker, N.J., et al., *The burden of atrial fibrillation and other cardiac arrhythmias in an employed population: associated costs, absences, and objective productivity loss*. J Occup Environ Med, 2010. **52**(4): p. 383-91.
7. Wu, E.Q., et al., *Economic burden and co-morbidities of atrial fibrillation in a privately insured population*. Curr Med Res Opin, 2005. **21**(10): p. 1693-9.
8. Holstenson, E., et al., *Predictors of costs related to cardiovascular disease among patients with atrial fibrillation in five European countries*. Europace, 2011. **13**(1): p. 23-30.
9. Reynolds, M.R., et al., *Healthcare resource utilization and costs associated with recurrent episodes of atrial fibrillation: the FRACTAL registry*. J Cardiovasc Electrophysiol, 2007. **18**(6): p. 628-33.
10. Jonsson, L., et al., *Cost of illness and drivers of cost in atrial fibrillation in Sweden and Germany*. Appl Health Econ Health Policy, 2010. **8**(5): p. 317-25.
11. Johnsen, S.P., et al., *Cost of illness of atrial fibrillation: a nationwide study of societal impact*. BMC Health Services Research, 2017. **17**(1): p. 714.
12. Tarricone, R., *Cost-of-illness analysis. What room in health economics?* Health Policy, 2006. **77**(1): p. 51-63.
13. de Lagasnerie, G., et al., *The economic burden of diabetes to French national health insurance: a new cost-of-illness method based on a combined medicalized and incremental approach*. Eur J Health Econ, 2018. **19**(2): p. 189-201.
14. Information Services Division Scotland. *General Acute Inpatient and Day Case - Scottish Morbidity Record (SMR01)*. 2015 [cited 2017 November 2017]; Available from: <http://www.ndc.scot.nhs.uk/National-Datasets/data.asp?SubID=2>.
15. Information Services Division Scotland. *Outpatient Attendance (SMR00)*. 2015 [cited 2015 January 2015]; Available from: <http://www.ndc.scot.nhs.uk/National-Datasets/data.asp?SubID=2>.
16. Information Service Division Scotland. *Care Home Census 2015*. 2015 [cited 2015 November 2015]; Available from: <http://www.isdscotland.org/Health-Topics/Health-and-Social-Community-Care/Care-Homes/Previous-Publications/>.
17. Information Service Division Scotland. *Scottish National Tariff*. 2015 [cited 2015 December 2015]; Available from: <http://www.isdscotland.org/Health-Topics/Finance/Scottish-National-Tariff/>.

18. Healthcare Resource Groups. *Healthcare Resource Groups*. 2015 [cited 2015 November 2015]; Available from: <http://www.hscic.gov.uk/hrg>.
19. Alvarez-Madrazo, S., et al., *Data Resource Profile: The Scottish National Prescribing Information System (PIS)*. International Journal of Epidemiology, 2016.
20. Henry, A.G., et al., *Economic Evaluation in Clinical Trials*. 'Oxford University Press': Oxford, UK.
21. Manning, W.G., A. Basu, and J. Mullahy, *Generalized modeling approaches to risk adjustment of skewed outcomes data*. Journal of Health Economics, 2005. **24**(3): p. 465-488.
22. The Scottish Government. *Scottish Index of Multiple Deprivation*. 2015 [cited 2015 November 2015]; Available from: <http://www.gov.scot/Topics/Statistics/SIMD>.
23. The Scottish Government. *NHS Boards*. 2015 [cited 2015 January 2015]; Available from: <http://www.gov.scot/Topics/Health/NHS-Workforce/NHS-Boards>.
24. The Scottish Government. *Scottish Government Urban Rural Classification*. 2015 [cited 2015 January 2015]; Available from: <http://www.gov.scot/Topics/Statistics/About/Methodology/UrbanRuralClassification>.
25. Charlson, M.E., et al., *A new method of classifying prognostic comorbidity in longitudinal studies: Development and validation*. Journal of Chronic Diseases, 1987. **40**(5): p. 373-383.
26. Leyland, A.H., et al., *Cause-specific inequalities in mortality in Scotland: two decades of change. A population-based study*. BMC Public Health, 2007. **7**: p. 172.
27. Zweifel, P., S. Felder, and M. Meiers, *Ageing of population and health care expenditure: a red herring?* Health Econ, 1999. **8**(6): p. 485-96.
28. Stewart, S., et al., *Cost of an emerging epidemic: an economic analysis of atrial fibrillation in the UK*. Heart, 2004. **90**(3): p. 286-292.
29. Stroke, C.-P.G.o.H.D.a. *A Focus on Atrial Fibrillation in Scotland 2017*. 2017 March 2018]; Available from: <https://www.chss.org.uk/documents/2018/01/a-focus-on-atrial-fibrillation-in-scotland-pdf.pdf>.
30. Camm, A.J., et al., *2012 focused update of the ESC Guidelines for the management of atrial fibrillation: an update of the 2010 ESC Guidelines for the management of atrial fibrillation. Developed with the special contribution of the European Heart Rhythm Association*. Eur Heart J, 2012. **33**(21): p. 2719-47.

## Figure legends

**Figure 1.** Average annual costs per patient hospitalised with AF by sector. Cost components with confidence interval are presented for each age group.

**Figure 2.** Average cost per patient hospitalised with AF by Charlson Comorbidity Index. Cost components with confidence interval are presented for each Comorbidity category.

For peer review only

## Tables

**Table 1. Baseline characteristics of AF patients**

| Characteristics                           | N (%)                 |
|-------------------------------------------|-----------------------|
| Number of patients                        | 278,286               |
| Mean age at first admission*(SD)**(range) | 74 *(12.5) **(0 -108) |
| <b>Sex</b>                                |                       |
| Male                                      | 139,928 (50.3)        |
| Female                                    | 138,358 (49.7)        |
| <b>Health Boards</b>                      |                       |
| Greater Glasgow & Clyde                   | 61,822 (22.2)         |
| Lothian                                   | 41,169 (14.8)         |
| Lanarkshire                               | 31,049 (11.2)         |
| Grampian                                  | 25,728 (9.3)          |
| Ayrshire & Arran                          | 22,003 (7.9)          |
| Tayside                                   | 25,003 (9.0)          |
| Fife                                      | 17,954 (6.5)          |
| Highland                                  | 18,929 (6.9)          |
| Forth valley                              | 13,664 (4.9)          |
| Dumfries & Galloway                       | 9,798 (3.5)           |
| Borders                                   | 7,222 (2.6)           |
| Western isles                             | 1,868 (0.7)           |
| Shetland                                  | 1,036 (0.4)           |
| Orkney                                    | 1,041 (0.4)           |
| <b>Geography</b>                          |                       |
| Large/urban                               | 106,868 (38.4)        |
| Other/urban                               | 82,601 (29.7)         |
| Accessible small towns                    | 24,938 (9.0)          |
| Remote small towns                        | 8,272 (3.0)           |
| Very remote small towns                   | 3,828 (1.4)           |
| Accessible rural                          | 30,826 (11.1)         |
| Remote rural                              | 10,371 (3.7)          |
| Very remote rural                         | 10,087 (3.6)          |
| <b>SIMD quintile</b>                      |                       |
| 1                                         | 62,730 (22.5)         |
| 2                                         | 62,632 (22.5)         |
| 3                                         | 55,943 (20.1)         |
| 4                                         | 50,691 (18.2)         |
| 5                                         | 46,279 (16.6)         |
| <b>Comorbidity</b>                        |                       |
| no comorbidity                            | 40,502 (14.6)         |
| 1 comorbidity                             | 53,651 (19.3)         |
| >1 comorbidities                          | 184,133 (66.2)        |
| Re-hospitalised (any condition)           | 179,494 (64.5)        |
| Admitted to care-home                     | 7,235 (2.6)           |
| <b>Mortality</b>                          |                       |
| Alive                                     | 204,690 (73.6)        |
| Dead                                      | 73,596 (26.4)         |



**Table 2. Regression results: probability of healthcare resources utilisation and cost estimation**

| Covariates               | Probability<br>(1 <sup>st</sup> modelling part) |          | Cost Ratios<br>(2 <sup>nd</sup> modelling part) |          |
|--------------------------|-------------------------------------------------|----------|-------------------------------------------------|----------|
|                          | Coefficient (95% CI)                            | Std. Err | Coefficient (95% CI)                            | Std. Err |
| <b>Age group (years)</b> |                                                 |          |                                                 |          |
| 0-49                     | Reference                                       |          |                                                 |          |
| 50-54                    | 0.329 (0.260, 0.398)                            | 0.035    | 0.036 (-0.016, 0.087)                           | 0.026    |
| 55-59                    | 0.388 (0.326, 0.450)                            | 0.031    | 0.081 (0.036, 0.127)                            | 0.023    |
| 60-64                    | 0.464 (0.407, 0.521)                            | 0.029    | 0.124 (0.082, 0.166)                            | 0.021    |
| 65-69                    | 0.486 (0.432, 0.540)                            | 0.028    | 0.157 (0.116, 0.198)                            | 0.021    |
| 70-74                    | 0.479 (0.426, 0.533)                            | 0.027    | 0.213 (0.174, 0.252)                            | 0.020    |
| 75-79                    | 0.536 (0.482, 0.590)                            | 0.027    | 0.222 (0.183, 0.260)                            | 0.020    |
| 80-84                    | 0.431 (0.375, 0.486)                            | 0.028    | 0.286 (0.246, 0.326)                            | 0.020    |
| 85-89                    | 0.378 (0.318, 0.437)                            | 0.030    | 0.375 (0.332, 0.417)                            | 0.021    |
| 90-max                   | 0.150 (0.083, 0.217)                            | 0.034    | 0.516 (0.468, 0.564)                            | 0.025    |
| <b>Sex</b>               |                                                 |          |                                                 |          |
| Male                     | Reference                                       |          |                                                 |          |
| Female                   | 0.045 (0.028, 0.062)                            | 0.009    | 0.054 (0.044, 0.064)                            | 0.005    |
| Date of admission        | 0.169 (0.167, 0.171)                            | 0.001    | -0.024 (-0.025, -0.023)                         | 0.001    |
| <b>SIMD quintile</b>     |                                                 |          |                                                 |          |
| 1                        | Reference                                       |          |                                                 |          |
| 2                        | 0.027 (-0.018, 0.071)                           | 0.023    | -0.055 (-0.080, -0.031)                         | 0.012    |
| 3                        | -0.041 (-0.086, 0.003)                          | 0.023    | -0.080 (-0.106, -0.054)                         | 0.013    |
| 4                        | -0.046 (-0.091, -0.002)                         | 0.023    | -0.116 (-0.141, -0.090)                         | 0.013    |
| 5                        | -0.072 (-0.117, -0.027)                         | 0.023    | -0.147 (-0.172, -0.122)                         | 0.013    |
| <b>Geography</b>         |                                                 |          |                                                 |          |
| Large urban              | Reference                                       |          |                                                 |          |
| Other urban              | -0.130 (-0.156, -0.105)                         | 0.013    | -0.023 (-0.037, -0.009)                         | 0.007    |
| Accessible small towns   | -0.153 (-0.187, -0.119)                         | 0.017    | -0.041 (-0.060, -0.022)                         | 0.010    |
| Accessible rural         | -0.197 (-0.230, -0.165)                         | 0.016    | -0.043 (-0.062, -0.024)                         | 0.010    |
| Remote small towns       | -0.145 (-0.197, -0.093)                         | 0.027    | 0.009 (-0.023, 0.041)                           | 0.016    |
| Remote rural             | -0.288 (-0.335, -0.241)                         | 0.024    | -0.036 (-0.065, -0.007)                         | 0.015    |
| Very remote small towns  | -0.380 (-0.459, -0.300)                         | 0.041    | -0.057 (-0.107, -0.006)                         | 0.026    |
| Very remote rural        | -0.346 (-0.407, -0.284)                         | 0.031    | -0.061 (-0.102, -0.020)                         | 0.021    |
| <b>Health boards</b>     |                                                 |          |                                                 |          |
| Great Glasgow and Clyde  | Reference                                       |          |                                                 |          |
| Lothian                  | -0.044 (-0.075, -0.014)                         | 0.016    | -0.033 (-0.049, -0.017)                         | 0.008    |
| Lanarkshire              | -0.005 (-0.038, 0.029)                          | 0.017    | -0.063 (-0.081, -0.045)                         | 0.009    |
| Ayrshire and Arran       | -0.358 (-0.394, -0.321)                         | 0.019    | -0.046 (-0.068, -0.024)                         | 0.011    |
| Grampian                 | 0.017 (-0.019, 0.054)                           | 0.019    | -0.059 (-0.078, -0.039)                         | 0.010    |
| Tayside                  | -0.402 (-0.436, -0.368)                         | 0.018    | -0.083 (-0.103, -0.062)                         | 0.010    |
| Fife                     | -0.059 (-0.101, -0.017)                         | 0.022    | -0.009 (-0.033, 0.016)                          | 0.012    |
| Highland                 | -0.175 (-0.225, -0.124)                         | 0.026    | -0.046 (-0.077, -0.015)                         | 0.016    |
| Forth Valley             | -0.477 (-0.518, -0.436)                         | 0.021    | -0.109 (-0.135, -0.082)                         | 0.013    |
| Dumfries and Galloway    | -0.303 (-0.352, -0.253)                         | 0.025    | -0.134 (-0.164, -0.104)                         | 0.015    |
| Borders                  | -0.501 (-0.554, -0.449)                         | 0.027    | -0.086 (-0.120, -0.052)                         | 0.017    |
| Western Isles            | -1.072 (-1.171, -0.974)                         | 0.050    | 0.457 (0.381, 0.533)                            | 0.039    |

|                          |                         |       |                        |       |
|--------------------------|-------------------------|-------|------------------------|-------|
| Orkney                   | -0.362 (-0.492, -0.232) | 0.066 | -0.029 (-0.117, 0.059) | 0.045 |
| Shetland                 | -0.495 (-0.622, -0.368) | 0.065 | -0.076 (-0.171, 0.018) | 0.048 |
| Mortality within 5 years |                         |       |                        |       |
| Alive                    | Reference               |       |                        |       |
| Dead                     | 0.418 (0.376, 0.461)    | 0.022 | 0.652 (0.630, 0.674)   | 0.011 |
| Comorbidity              |                         |       |                        |       |
| no comorbidities         | Reference               |       |                        |       |
| 1 comorbidity            | 0.666 (0.567, 0.766)    | 0.051 | 0.374 (0.299, 0.450)   | 0.038 |
| >1 comorbidities         | 1.205 (1.021, 1.390)    | 0.094 | 0.990 (0.910, 1.070)   | 0.041 |

**Table 3. Regression results: probability of healthcare resources utilisation and cost estimation (alive at the end of the five-year follow-up period)**

| Covariates              | Probability<br>(1 <sup>st</sup> modelling part) |          | Cost Ratios<br>(2 <sup>nd</sup> modelling part) |          |
|-------------------------|-------------------------------------------------|----------|-------------------------------------------------|----------|
|                         | Coefficient (95% CI)                            | Std. Err | Coefficient (95% CI)                            | Std. Err |
| Age group (years)       |                                                 |          |                                                 |          |
| 0-49                    | Reference                                       |          |                                                 |          |
| 50-54                   | 0.352 (0.282, 0.422)                            | 0.036    | 0.067 (0.013, 0.120)                            | 0.027    |
| 55-59                   | 0.424 (0.361, 0.488)                            | 0.032    | 0.148 (0.098, 0.199)                            | 0.026    |
| 60-64                   | 0.528 (0.470, 0.586)                            | 0.030    | 0.218 (0.174, 0.263)                            | 0.023    |
| 65-69                   | 0.571 (0.516, 0.627)                            | 0.028    | 0.292 (0.248, 0.336)                            | 0.022    |
| 70-74                   | 0.603 (0.549, 0.658)                            | 0.028    | 0.412 (0.371, 0.454)                            | 0.021    |
| 75-79                   | 0.684 (0.630, 0.739)                            | 0.028    | 0.484 (0.443, 0.525)                            | 0.021    |
| 80-84                   | 0.572 (0.516, 0.628)                            | 0.028    | 0.615 (0.572, 0.659)                            | 0.022    |
| 85-89                   | 0.496 (0.435, 0.557)                            | 0.031    | 0.805 (0.756, 0.854)                            | 0.025    |
| 90-max                  | 0.206 (0.134, 0.279)                            | 0.037    | 1.044 (0.981, 1.106)                            | 0.032    |
| Sex                     |                                                 |          |                                                 |          |
| Male                    | Reference                                       |          |                                                 |          |
| Female                  | 0.067 (0.048, 0.086)                            | 0.010    | 0.050 (0.037, 0.063)                            | 0.007    |
| Date of admission       | 0.171 (0.170, 0.173)                            | 0.001    | -0.059 (-0.060, -0.057)                         | 0.001    |
| SIMD quintile           |                                                 |          |                                                 |          |
| 1                       | Reference                                       |          |                                                 |          |
| 2                       | 0.021 (-0.009, 0.050)                           | 0.015    | -0.052 (-0.071, -0.033)                         | 0.010    |
| 3                       | -0.023 (-0.054, 0.008)                          | 0.016    | -0.081 (-0.101, -0.060)                         | 0.011    |
| 4                       | -0.045 (-0.077, -0.014)                         | 0.016    | -0.117 (-0.138, -0.096)                         | 0.011    |
| 5                       | -0.051 (-0.083, -0.020)                         | 0.016    | -0.160 (-0.181, -0.139)                         | 0.011    |
| Geography               |                                                 |          |                                                 |          |
| Large urban             | Reference                                       |          |                                                 |          |
| Other urban             | -0.140 (-0.169, -0.112)                         | 0.014    | -0.030 (-0.049, -0.012)                         | 0.010    |
| Accessible small towns  | -0.172 (-0.210, -0.134)                         | 0.019    | -0.052 (-0.077, -0.026)                         | 0.013    |
| Accessible rural        | -0.217 (-0.253, -0.181)                         | 0.018    | -0.061 (-0.086, -0.037)                         | 0.013    |
| Remote small towns      | -0.145 (-0.203, -0.087)                         | 0.030    | -0.007 (-0.048, 0.035)                          | 0.021    |
| Remote rural            | -0.319 (-0.371, -0.268)                         | 0.026    | -0.064 (-0.101, -0.027)                         | 0.019    |
| Very remote small towns | -0.404 (-0.491, -0.318)                         | 0.044    | -0.098 (-0.161, -0.036)                         | 0.032    |
| Very remote rural       | -0.360 (-0.428, -0.293)                         | 0.034    | -0.087 (-0.138, -0.035)                         | 0.026    |

| Health boards           |                         |       |                         |       |  |
|-------------------------|-------------------------|-------|-------------------------|-------|--|
| Great Glasgow and Clyde | Reference               |       |                         |       |  |
| Lothian                 | -0.055 (-0.090, -0.020) | 0.018 | -0.051 (-0.072, -0.030) | 0.011 |  |
| Lanarkshire             | 0.003 (-0.034, 0.040)   | 0.019 | -0.072 (-0.095, -0.048) | 0.012 |  |
| Ayrshire and Arran      | -0.396 (-0.436, -0.355) | 0.021 | -0.064 (-0.093, -0.035) | 0.015 |  |
| Grampian                | 0.029 (-0.013, 0.070)   | 0.021 | -0.051 (-0.077, -0.026) | 0.013 |  |
| Tayside                 | -0.453 (-0.491, -0.415) | 0.019 | -0.094 (-0.120, -0.067) | 0.014 |  |
| Fife                    | -0.087 (-0.134, -0.040) | 0.024 | -0.024 (-0.057, 0.008)  | 0.017 |  |
| Highland                | -0.191 (-0.247, -0.135) | 0.029 | -0.037 (-0.075, 0.001)  | 0.020 |  |
| Forth Valley            | -0.520 (-0.566, -0.474) | 0.023 | -0.108 (-0.141, -0.074) | 0.017 |  |
| Dumfries and Galloway   | -0.314 (-0.369, -0.259) | 0.028 | -0.166 (-0.206, -0.127) | 0.020 |  |
| Borders                 | -0.547 (-0.605, -0.489) | 0.030 | -0.099 (-0.144, -0.054) | 0.023 |  |
| Western Isles           | -1.164 (-1.264, -1.063) | 0.051 | 0.139 (0.057, 0.221)    | 0.042 |  |
| Orkney                  | -0.394 (-0.535, -0.252) | 0.072 | 0.002 (-0.114, 0.117)   | 0.059 |  |
| Shetland                | -0.605 (-0.740, -0.470) | 0.069 | -0.044 (-0.172, 0.085)  | 0.066 |  |
| Comorbidity             |                         |       |                         |       |  |
| no comorbidities        | Reference               |       |                         |       |  |
| 1 comorbidity           | 0.705 (0.602, 0.808)    | 0.052 | 0.432 (0.352, 0.513)    | 0.041 |  |
| >1 comorbidities        | 1.165 (0.974, 1.357)    | 0.098 | 1.133 (1.041, 1.226)    | 0.047 |  |

**Table 4. Regression results: probability of healthcare resources utilisation and cost estimation (dead at the end of the five-year follow-up period)**

| Covariates               | Probability<br>(1 <sup>st</sup> modelling part) |          | Cost Ratios<br>(2 <sup>nd</sup> modelling part) |          |
|--------------------------|-------------------------------------------------|----------|-------------------------------------------------|----------|
|                          | Coefficient (95% CI)                            | Std. Err | Coefficient (95% CI)                            | Std. Err |
| <b>Age group (years)</b> |                                                 |          |                                                 |          |
| 0-49                     | Reference                                       |          |                                                 |          |
| 50-54                    | 0.150 (-0.125, 0.426)                           | 0.141    | -0.112 (-0.405, 0.180)                          | 0.149    |
| 55-59                    | 0.134 (-0.098, 0.366)                           | 0.118    | -0.093 (-0.334, 0.147)                          | 0.123    |
| 60-64                    | 0.129 (-0.080, 0.338)                           | 0.107    | 0.000 (-0.208, 0.209)                           | 0.106    |
| 65-69                    | 0.129 (-0.067, 0.326)                           | 0.101    | -0.011 (-0.212, 0.189)                          | 0.102    |
| 70-74                    | 0.107 (-0.084, 0.298)                           | 0.097    | 0.016 (-0.180, 0.213)                           | 0.100    |
| 75-79                    | 0.128 (-0.059, 0.315)                           | 0.095    | -0.005 (-0.198, 0.189)                          | 0.099    |
| 80-84                    | 0.132 (-0.053, 0.318)                           | 0.095    | 0.056 (-0.136, 0.247)                           | 0.098    |
| 85-89                    | -0.048 (-0.233, 0.137)                          | 0.094    | 0.066 (-0.126, 0.257)                           | 0.098    |
| 90-max                   | -0.518 (-0.702, -0.333)                         | 0.094    | 0.097 (-0.095, 0.290)                           | 0.098    |
| <b>Sex</b>               |                                                 |          |                                                 |          |
| Male                     | Reference                                       |          |                                                 |          |
| Female                   | 0.048 (0.033, 0.063)                            | 0.008    | 0.028 (0.014, 0.043)                            | 0.007    |
| Date of admission        | -0.040 (-0.042, -0.039)                         | 0.001    | 0.004 (0.002, 0.005)                            | 0.001    |
| <b>SIMD quintile</b>     |                                                 |          |                                                 |          |
| 1                        | Reference                                       |          |                                                 |          |
| 2                        | 0.033 (0.011, 0.055)                            | 0.011    | 0.015 (-0.005, 0.036)                           | 0.011    |
| 3                        | 0.058 (0.034, 0.082)                            | 0.012    | -0.008 (-0.030, 0.015)                          | 0.012    |
| 4                        | 0.065 (0.039, 0.090)                            | 0.013    | -0.017 (-0.041, 0.007)                          | 0.012    |

|                         |                         |       |                         |       |
|-------------------------|-------------------------|-------|-------------------------|-------|
| 5                       | 0.113 (0.088, 0.138)    | 0.013 | -0.024 (-0.049, 0.000)  | 0.012 |
| <b>Geography</b>        |                         |       |                         |       |
| Large urban             | Reference               |       |                         |       |
| Other urban             | -0.010 (-0.032, 0.012)  | 0.011 | -0.033 (-0.054, -0.012) | 0.011 |
| Accessible small towns  | -0.006 (-0.036, 0.025)  | 0.015 | -0.049 (-0.077, -0.021) | 0.014 |
| Accessible rural        | -0.031 (-0.060, -0.001) | 0.015 | -0.036 (-0.064, -0.008) | 0.014 |
| Remote small towns      | -0.054 (-0.102, -0.005) | 0.025 | 0.003 (-0.042, 0.049)   | 0.023 |
| Remote rural            | -0.038 (-0.084, 0.009)  | 0.024 | -0.012 (-0.057, 0.034)  | 0.023 |
| Very remote small towns | -0.065 (-0.147, 0.017)  | 0.042 | 0.036 (-0.052, 0.123)   | 0.045 |
| Very remote rural       | 0.014 (-0.051, 0.078)   | 0.033 | -0.002 (-0.068, 0.065)  | 0.034 |
| <b>Health boards</b>    |                         |       |                         |       |
| Great Glasgow and Clyde | Reference               |       |                         |       |
| Lothian                 | 0.029 (0.004, 0.055)    | 0.013 | 0.029 (0.006, 0.053)    | 0.012 |
| Lanarkshire             | -0.052 (-0.080, -0.023) | 0.014 | -0.034 (-0.061, -0.008) | 0.013 |
| Ayrshire and Arran      | -0.122 (-0.155, -0.089) | 0.017 | 0.011 (-0.020, 0.042)   | 0.016 |
| Grampian                | 0.075 (0.044, 0.106)    | 0.016 | -0.057 (-0.086, -0.028) | 0.015 |
| Tayside                 | -0.024 (-0.056, 0.007)  | 0.016 | -0.061 (-0.089, -0.033) | 0.014 |
| Fife                    | -0.028 (-0.064, 0.008)  | 0.018 | 0.047 (0.012, 0.082)    | 0.018 |
| Highland                | 0.034 (-0.015, 0.084)   | 0.025 | -0.065 (-0.117, -0.013) | 0.027 |
| Forth Valley            | -0.060 (-0.099, -0.021) | 0.020 | -0.123 (-0.161, -0.085) | 0.019 |
| Dumfries and Galloway   | -0.027 (-0.074, 0.020)  | 0.024 | -0.014 (-0.058, 0.029)  | 0.022 |
| Borders                 | -0.058 (-0.112, -0.005) | 0.027 | -0.023 (-0.074, 0.029)  | 0.026 |
| Western Isles           | -0.033 (-1.168, 1.102)  | 0.579 | 0.305 (-0.165, 0.775)   | 0.240 |
| Orkney                  | 0.191 (0.055, 0.327)    | 0.069 | -0.180 (-0.317, -0.042) | 0.070 |
| Shetland                | -0.031 (-0.170, 0.108)  | 0.071 | -0.187 (-0.323, -0.052) | 0.069 |
| <b>Comorbidity</b>      |                         |       |                         |       |
| no comorbidities        | Reference               |       |                         |       |
| 1 comorbidity           | -0.176 (-0.449, 0.097)  | 0.139 | 0.147 (-0.127, 0.422)   | 0.140 |
| >1 comorbidities        | -0.256 (-0.491, -0.021) | 0.120 | 0.626 (0.401, 0.851)    | 0.115 |

**Table 5. Average annual costs per patient hospitalised with AF by sex**

| Sex           | Cost estimates      |              |
|---------------|---------------------|--------------|
|               | Mean total cost (%) | 95% CI       |
| <b>Male</b>   |                     |              |
| Inpatient     | 2935 (79.99)        | (2915, 2955) |
| Outpatient    | 31 (8.46)           | (308, 313)   |
| Care home     | 165 (4.50)          | (154, 177)   |
| PIS           | 242 (6.60)          | (240, 245)   |
| Total         | 3669                | (3872, 3927) |
| <b>Female</b> |                     |              |
| Inpatient     | 3022 (77.49)        | (3001, 3042) |
| Outpatient    | 310 (7.96)          | (308, 313)   |
| Care home     | 268 (6.88)          | (255, 281)   |
| PIS           | 259 (6.64)          | (256, 262)   |
| Total         | 3968                | (3872, 3927) |

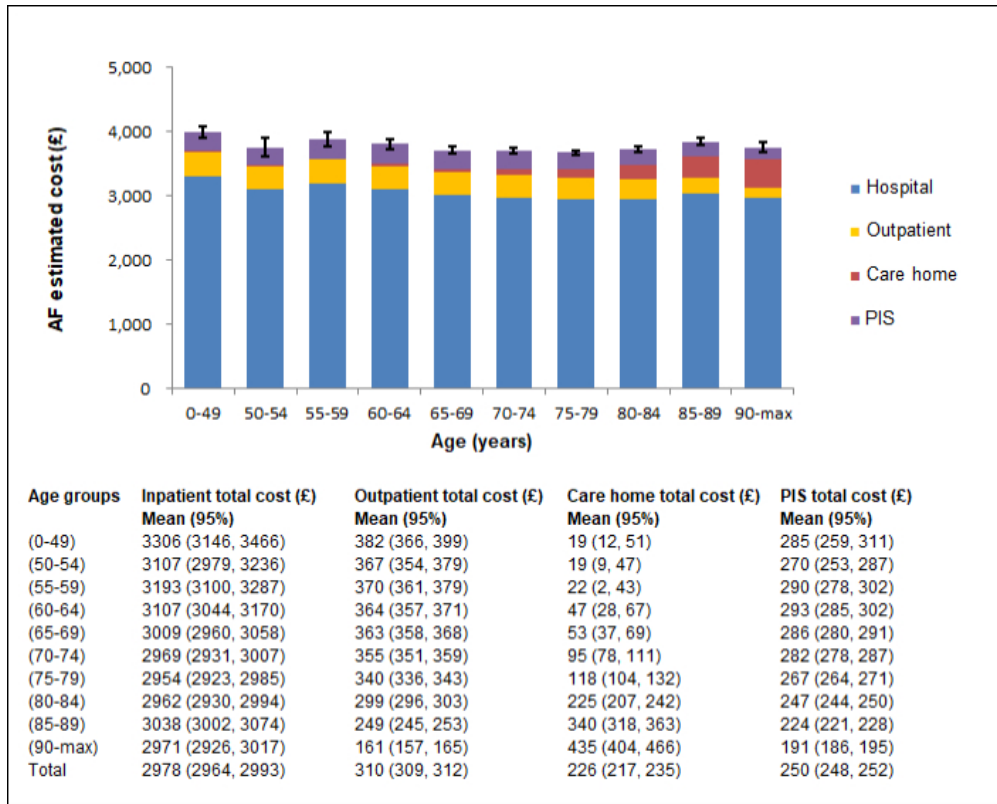

Average annual costs per patient hospitalised with AF by sector. Cost components with confidence interval are presented for each age group.

59x47mm (300 x 300 DPI)

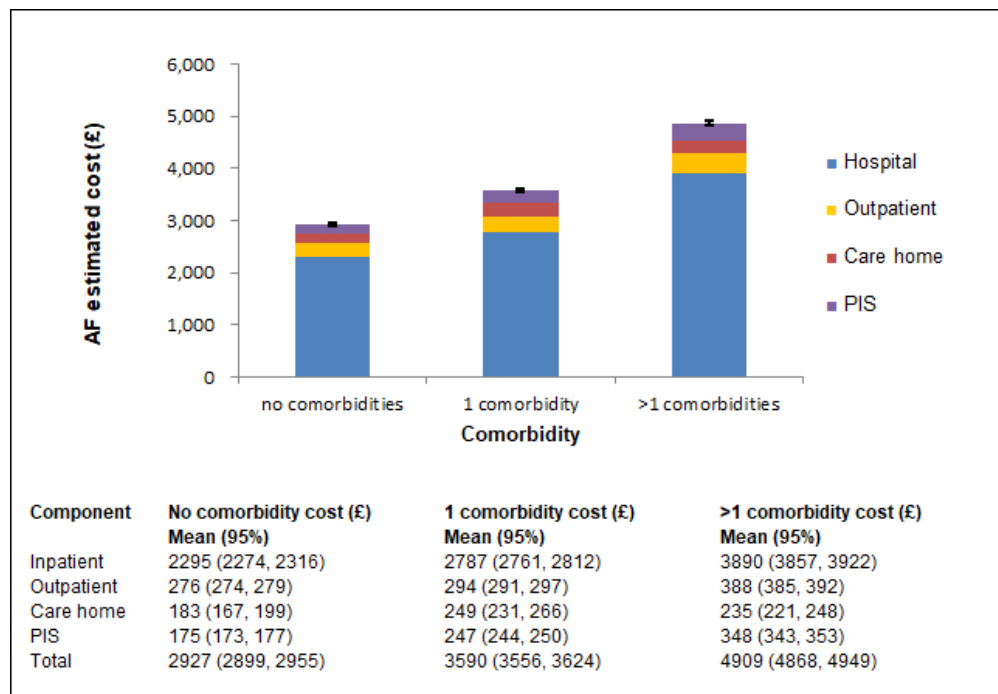

Average cost per patient hospitalised with AF by Charlson Comorbidity Index. Cost components with confidence interval are presented for each Comorbidity category.

54x37mm (300 x 300 DPI)

## ONLINE SUPPLEMENT

**Equation I. Probability of healthcare utilisation**

$$\Pr(HCE_{it} > 0) = \alpha + \beta_1 \sum_{s=2}^{10} A_{it} + \beta_2 G_i + \beta_3 Y_i + \beta_4 \sum_{s=2}^5 S_i + \beta_5 \sum_{u=2}^8 U_i + \beta_6 \sum_{h=2}^{14} H_i$$

$$+ \beta_7 \sum_{c=2}^3 C_{it} + \beta_8 D_i + \left( \beta_9 \sum_{s=2}^5 S_i * D_i \right) + \left( \beta_{10} \sum_{c=2}^3 C_{it} * \sum_{s=2}^{10} A_{it} \right) + u_i$$

Where: A is age at the time of admission (reference category: 0-49 age group); G is sex (reference category: male); Y year of admission; S is SIMD quintile (reference category: most deprived quintile (1)); U is the urban/rural classification (reference category: large urban area); H is health board of inpatient admission (reference category: Greater Glasgow & Clyde); C is the Charlson comorbidity index (reference category: no comorbidities); D is mortality during five year follow-up;  $u_i$  is the error term for patient  $i$  at time  $t$ .

**Equation II. Cost estimation**

$$E[HCE] = g(x\beta)$$

Where  $x\beta$  is the linear predictor for HCE

**Equation III. Multiplying first and second part**

$$E[HCE|X] = \Pr(HCE > 0|X) * E[HCE|HCE > 0, X]$$

**Table I. Regression interactions: probability of healthcare resources utilisation and cost estimation**

| Covariates                                                            | Probability<br>(1 <sup>st</sup> modelling part) |          | Probability<br>(2 <sup>nd</sup> modelling part) |          |
|-----------------------------------------------------------------------|-------------------------------------------------|----------|-------------------------------------------------|----------|
|                                                                       | Coefficient (95% CI)                            | Std. Err | Coefficient (95% CI)                            | Std. Err |
| <b>Interaction: SIMD - Mortality within 5 years</b>                   |                                                 |          |                                                 |          |
| 1                                                                     | Reference                                       |          |                                                 |          |
| 2                                                                     | -0.015 (-0.069, 0.038)                          | 0.027    | 0.056 (0.027, 0.086)                            | 0.015    |
| 3                                                                     | 0.046 (-0.007, 0.100)                           | 0.027    | 0.067 (0.036, 0.097)                            | 0.016    |
| 4                                                                     | 0.017 (-0.037, 0.071)                           | 0.028    | 0.089 (0.059, 0.120)                            | 0.016    |
| 5                                                                     | 0.069 (0.013, 0.125)                            | 0.029    | 0.100 (0.069, 0.132)                            | 0.016    |
| <b>Interaction: age (year) - Charlson score (1 comorbidity)</b>       |                                                 |          |                                                 |          |
| 0-49                                                                  | Reference                                       |          |                                                 |          |
| 50-54                                                                 | -0.195 (-0.342, -0.049)                         | 0.075    | -0.016 (-0.124, 0.092)                          | 0.055    |
| 55-59                                                                 | -0.384 (-0.514, -0.255)                         | 0.066    | -0.081 (-0.173, 0.012)                          | 0.047    |
| 60-64                                                                 | -0.459 (-0.579, -0.340)                         | 0.061    | -0.116 (-0.202, -0.031)                         | 0.044    |
| 65-69                                                                 | -0.500 (-0.613, -0.386)                         | 0.058    | -0.161 (-0.244, -0.078)                         | 0.042    |
| 70-74                                                                 | -0.510 (-0.621, -0.399)                         | 0.057    | -0.202 (-0.283, -0.121)                         | 0.041    |
| 75-79                                                                 | -0.570 (-0.680, -0.461)                         | 0.056    | -0.197 (-0.276, -0.117)                         | 0.041    |
| 80-84                                                                 | -0.594 (-0.704, -0.484)                         | 0.056    | -0.209 (-0.290, -0.128)                         | 0.041    |
| 85-89                                                                 | -0.643 (-0.756, -0.531)                         | 0.058    | -0.215 (-0.298, -0.132)                         | 0.042    |
| 90-max                                                                | -0.709 (-0.828, -0.590)                         | 0.061    | -0.267 (-0.357, -0.178)                         | 0.045    |
| <b>Interaction: age (year) - Charlson score (&gt;1 comorbidities)</b> |                                                 |          |                                                 |          |
| 0-49                                                                  | Reference                                       |          |                                                 |          |
| 50-54                                                                 | -0.449 (-0.685, -0.213)                         | 0.121    | -0.214 (-0.316, -0.111)                         | 0.052    |
| 55-59                                                                 | -0.539 (-0.751, -0.327)                         | 0.108    | -0.209 (-0.305, -0.112)                         | 0.049    |
| 60-64                                                                 | -0.534 (-0.734, -0.334)                         | 0.102    | -0.323 (-0.412, -0.234)                         | 0.045    |
| 65-69                                                                 | -0.573 (-0.767, -0.378)                         | 0.099    | -0.436 (-0.523, -0.350)                         | 0.044    |
| 70-74                                                                 | -0.650 (-0.842, -0.459)                         | 0.098    | -0.520 (-0.604, -0.436)                         | 0.043    |
| 75-79                                                                 | -0.767 (-0.957, -0.577)                         | 0.097    | -0.556 (-0.639, -0.473)                         | 0.042    |
| 80-84                                                                 | -0.857 (-1.047, -0.667)                         | 0.097    | -0.625 (-0.709, -0.541)                         | 0.043    |
| 85-89                                                                 | -0.967 (-1.159, -0.775)                         | 0.098    | -0.661 (-0.747, -0.576)                         | 0.044    |
| 90-max                                                                | -1.074 (-1.270, -0.878)                         | 0.100    | -0.805 (-0.896, -0.714)                         | 0.046    |



**Equation IV. Probability of healthcare utilisation (alive at the end of the five-year follow-up period)**

$$\Pr(HCE_{it} > 0) = \alpha + \beta_1 \sum_{s=2}^{10} A_{it} + \beta_2 G_i + \beta_3 Y_i + \beta_4 \sum_{s=2}^5 S_i + \beta_5 \sum_{u=2}^8 U_i + \beta_6 \sum_{h=2}^{14} H_i + \beta_7 \sum_{c=2}^3 C_{it} + \left( \beta_8 \sum_{c=2}^3 C_{it} * \sum_{s=2}^{10} A_{it} \right) + u_i$$

Where: A is age at the time of admission (reference category: 0 -49 age group); G is sex (reference category: male); Y year of admission; S is SIMD quintile (reference category: most deprived quintile (1)); U is the urban/rural classification (reference category: large urban area); H is health board of inpatient admission (reference category: Greater Glasgow & Clyde); C is the Charlson comorbidity index (reference category: no comorbidities);  $u_i$  is the error term for patient  $i$  at time  $t$ .

**Table II. Regression interactions: probability of healthcare resources utilisation and cost estimation (alive at the end of the five-year follow-up period)**

| Covariates                                                            | Probability<br>(1 <sup>st</sup> modelling part) |          | Probability<br>(2 <sup>nd</sup> modelling part) |          |
|-----------------------------------------------------------------------|-------------------------------------------------|----------|-------------------------------------------------|----------|
|                                                                       | Coefficient (95%CI)                             | Std. Err | Coefficient (95%CI)                             | Std. Err |
| <b>Interaction: age (year) - Charlson score (1 comorbidity)</b>       |                                                 |          |                                                 |          |
| 0-49                                                                  | Reference                                       |          |                                                 |          |
| 50-54                                                                 | -0.190 (-0.341, -0.039)                         | 0.077    | -0.015 (-0.126, 0.097)                          | 0.057    |
| 55-59                                                                 | -0.400 (-0.534, -0.266)                         | 0.069    | -0.087 (-0.187, 0.014)                          | 0.051    |
| 60-64                                                                 | -0.484 (-0.608, -0.360)                         | 0.063    | -0.116 (-0.208, -0.023)                         | 0.047    |
| 65-69                                                                 | -0.531 (-0.649, -0.412)                         | 0.060    | -0.143 (-0.233, -0.053)                         | 0.046    |
| 70-74                                                                 | -0.559 (-0.674, -0.443)                         | 0.059    | -0.195 (-0.283, -0.107)                         | 0.045    |
| 75-79                                                                 | -0.635 (-0.750, -0.521)                         | 0.058    | -0.207 (-0.293, -0.121)                         | 0.044    |
| 80-84                                                                 | -0.680 (-0.796, -0.565)                         | 0.059    | -0.215 (-0.304, -0.125)                         | 0.046    |
| 85-89                                                                 | -0.730 (-0.850, -0.610)                         | 0.061    | -0.254 (-0.349, -0.159)                         | 0.048    |
| 90-max                                                                | -0.827 (-0.959, -0.695)                         | 0.067    | -0.281 (-0.393, -0.169)                         | 0.057    |
| <b>Interaction: age (year) - Charlson score (&gt;1 comorbidities)</b> |                                                 |          |                                                 |          |
| 0-49                                                                  | Reference                                       |          |                                                 |          |
| 50-54                                                                 | -0.408 (-0.658, -0.158)                         | 0.127    | -0.226 (-0.342, -0.109)                         | 0.059    |
| 55-59                                                                 | -0.504 (-0.726, -0.281)                         | 0.114    | -0.235 (-0.348, -0.122)                         | 0.058    |
| 60-64                                                                 | -0.525 (-0.735, -0.316)                         | 0.107    | -0.339 (-0.443, -0.236)                         | 0.053    |
| 65-69                                                                 | -0.580 (-0.784, -0.377)                         | 0.104    | -0.448 (-0.549, -0.347)                         | 0.051    |
| 70-74                                                                 | -0.713 (-0.913, -0.513)                         | 0.102    | -0.565 (-0.663, -0.467)                         | 0.050    |
| 75-79                                                                 | -0.820 (-1.019, -0.621)                         | 0.101    | -0.648 (-0.745, -0.552)                         | 0.049    |
| 80-84                                                                 | -0.938 (-1.137, -0.739)                         | 0.102    | -0.702 (-0.801, -0.603)                         | 0.051    |
| 85-89                                                                 | -1.074 (-1.276, -0.872)                         | 0.103    | -0.769 (-0.873, -0.665)                         | 0.053    |
| 90-max                                                                | -1.196 (-1.406, -0.986)                         | 0.107    | -0.932 (-1.051, -0.814)                         | 0.060    |

**Figure I. Average annual costs per patient hospitalised with AF by sector. Cost components with confidence interval are presented for each age group (alive at the end of the five-year follow-up period)**



**Equation V. Probability of healthcare utilisation (dead at the end of the five-year follow-up period)**

$$\Pr(HCE_{it} > 0) = \alpha + \beta_1 \sum_{s=2}^{10} A_{it} + \beta_2 G_i + \beta_3 Y_i + \beta_4 \sum_{s=2}^5 S_i + \beta_5 \sum_{u=2}^8 U_i + \beta_6 \sum_{h=2}^{14} H_i + \beta_7 \sum_{c=2}^3 C_{it} + \left( \beta_8 \sum_{c=2}^3 C_{it} * \sum_{s=2}^{10} A_{it} \right)$$

Where: A is age at the time of admission (reference category: 0 -49 age group); G is sex (reference category: male); Y year of admission; S is SIMD quintile (reference category: most deprived quintile (1)); U is the urban/rural classification (reference category: large urban area); H is health board of inpatient admission (reference category: Greater Glasgow & Clyde); C is the Charlson comorbidity index (reference category: no comorbidities);  $u_i$  is the error term for patient  $i$  at time  $t$ .

Note: the model for care home does not include the 0 -49 and 50-54 age groups, as none of those patients incurred any cost related to care home.

**Table III. Regression interactions: probability of healthcare resources utilisation and cost estimation (dead at the end of the five-year follow-up period)**

| Covariates                                                            | Probability<br>(1 <sup>st</sup> modelling part) |          | Probability<br>(2 <sup>nd</sup> modelling part) |          |
|-----------------------------------------------------------------------|-------------------------------------------------|----------|-------------------------------------------------|----------|
|                                                                       | Coefficient (95% CI)                            | Std. Err | Coefficient (95% CI)                            | Std. Err |
| <b>Interaction: age (year) - Charlson score (1 comorbidity)</b>       |                                                 |          |                                                 |          |
| 0-49                                                                  | Reference                                       |          |                                                 |          |
| 50-54                                                                 | -0.057 (-0.456, 0.343)                          | 0.204    | 0.124 (-0.268, 0.515)                           | 0.200    |
| 55-59                                                                 | 0.130 (-0.207, 0.468)                           | 0.172    | 0.054 (-0.282, 0.389)                           | 0.171    |
| 60-64                                                                 | 0.083 (-0.223, 0.389)                           | 0.156    | -0.009 (-0.309, 0.291)                          | 0.153    |
| 65-69                                                                 | 0.028 (-0.263, 0.320)                           | 0.149    | -0.054 (-0.342, 0.234)                          | 0.147    |
| 70-74                                                                 | -0.006 (-0.290, 0.278)                          | 0.145    | -0.051 (-0.334, 0.232)                          | 0.144    |
| 75-79                                                                 | -0.078 (-0.358, 0.201)                          | 0.143    | 0.002 (-0.278, 0.282)                           | 0.143    |
| 80-84                                                                 | -0.200 (-0.478, 0.078)                          | 0.142    | -0.048 (-0.326, 0.230)                          | 0.142    |
| 85-89                                                                 | -0.160 (-0.437, 0.117)                          | 0.141    | -0.039 (-0.316, 0.239)                          | 0.142    |
| 90-max                                                                | -0.154 (-0.431, 0.123)                          | 0.141    | -0.079 (-0.358, 0.200)                          | 0.142    |
| <b>Interaction: age (year) - Charlson score (&gt;1 comorbidities)</b> |                                                 |          |                                                 |          |
| 0-49                                                                  | Reference                                       |          |                                                 |          |
| 50-54                                                                 | 0.000 (-0.340, 0.339)                           | 0.173    | 0.066 (-0.268, 0.400)                           | 0.170    |
| 55-59                                                                 | -0.147 (-0.436, 0.142)                          | 0.147    | 0.041 (-0.240, 0.322)                           | 0.143    |
| 60-64                                                                 | -0.135 (-0.398, 0.128)                          | 0.134    | -0.114 (-0.360, 0.132)                          | 0.126    |
| 65-69                                                                 | -0.215 (-0.466, 0.036)                          | 0.128    | -0.164 (-0.401, 0.074)                          | 0.121    |
| 70-74                                                                 | -0.192 (-0.436, 0.053)                          | 0.125    | -0.237 (-0.470, -0.005)                         | 0.119    |
| 75-79                                                                 | -0.311 (-0.553, -0.070)                         | 0.123    | -0.248 (-0.478, -0.018)                         | 0.117    |
| 80-84                                                                 | -0.443 (-0.683, -0.204)                         | 0.122    | -0.367 (-0.595, -0.139)                         | 0.116    |
| 85-89                                                                 | -0.394 (-0.633, -0.154)                         | 0.122    | -0.394 (-0.623, -0.166)                         | 0.116    |
| 90-max                                                                | -0.312 (-0.551, -0.073)                         | 0.122    | -0.483 (-0.713, -0.254)                         | 0.117    |

**Figure II. Average annual costs per patient hospitalised with AF by sector. Cost components with confidence interval are presented for each age group (dead at the end of the five-year follow-up period)**

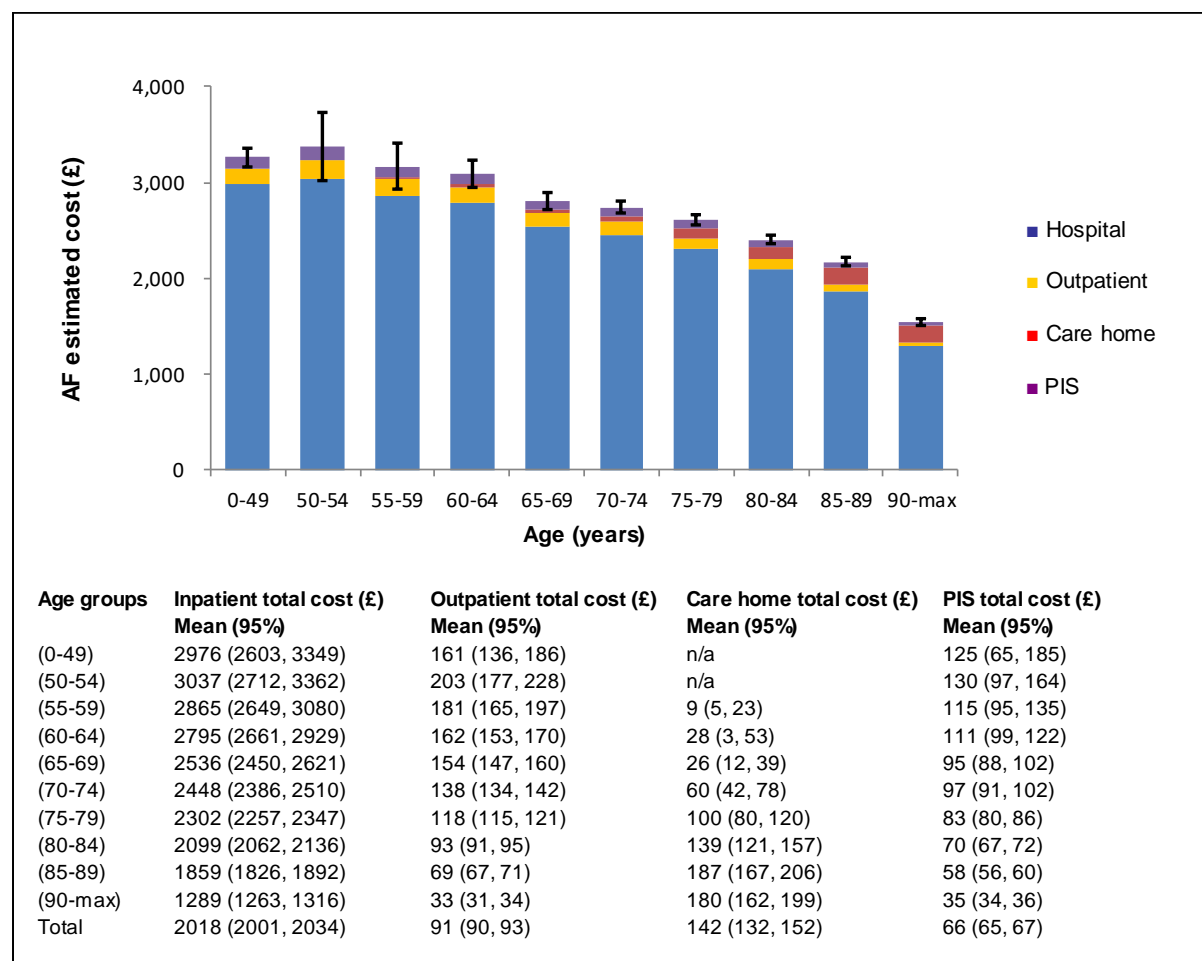

Note: the care home total cost estimation does not include the 0 -49 and 50-54 age groups, as none of those patients incurred any cost related to care home.

**STROBE 2007 (v4) Statement—Checklist of items that should be included in reports of *cohort studies***

| Section/Topic                | Item # | Recommendation                                                                                                                                                                       | Reported on page # |
|------------------------------|--------|--------------------------------------------------------------------------------------------------------------------------------------------------------------------------------------|--------------------|
| <b>Title and abstract</b>    | 1      | (a) Indicate the study's design with a commonly used term in the title or the abstract                                                                                               | 1                  |
|                              |        | (b) Provide in the abstract an informative and balanced summary of what was done and what was found                                                                                  | 1                  |
| <b>Introduction</b>          |        |                                                                                                                                                                                      |                    |
| Background/rationale         | 2      | Explain the scientific background and rationale for the investigation being reported                                                                                                 | 3                  |
| Objectives                   | 3      | State specific objectives, including any prespecified hypotheses                                                                                                                     | 3                  |
| <b>Methods</b>               |        |                                                                                                                                                                                      |                    |
| Study design                 | 4      | Present key elements of study design early in the paper                                                                                                                              | 3-4                |
| Setting                      | 5      | Describe the setting, locations, and relevant dates, including periods of recruitment, exposure, follow-up, and data collection                                                      | 4-5                |
| Participants                 | 6      | (a) Give the eligibility criteria, and the sources and methods of selection of participants. Describe methods of follow-up                                                           | 4-5                |
|                              |        | (b) For matched studies, give matching criteria and number of exposed and unexposed                                                                                                  | n/a                |
| Variables                    | 7      | Clearly define all outcomes, exposures, predictors, potential confounders, and effect modifiers. Give diagnostic criteria, if applicable                                             | 7-8                |
| Data sources/<br>measurement | 8*     | For each variable of interest, give sources of data and details of methods of assessment (measurement). Describe comparability of assessment methods if there is more than one group | n/a                |
| Bias                         | 9      | Describe any efforts to address potential sources of bias                                                                                                                            | 7                  |
| Study size                   | 10     | Explain how the study size was arrived at                                                                                                                                            | 4                  |
| Quantitative variables       | 11     | Explain how quantitative variables were handled in the analyses. If applicable, describe which groupings were chosen and why                                                         | 7-8                |
| Statistical methods          | 12     | (a) Describe all statistical methods, including those used to control for confounding                                                                                                | 6-8                |
|                              |        | (b) Describe any methods used to examine subgroups and interactions                                                                                                                  | 6-7                |
|                              |        | (c) Explain how missing data were addressed                                                                                                                                          | n/a                |
|                              |        | (d) If applicable, explain how loss to follow-up was addressed                                                                                                                       | n/a                |
|                              |        | (e) Describe any sensitivity analyses                                                                                                                                                | n/a                |
| <b>Results</b>               |        |                                                                                                                                                                                      |                    |

|                          |     |                                                                                                                                                                                                              |       |
|--------------------------|-----|--------------------------------------------------------------------------------------------------------------------------------------------------------------------------------------------------------------|-------|
| Participants             | 13* | (a) Report numbers of individuals at each stage of study—eg numbers potentially eligible, examined for eligibility, confirmed eligible, included in the study, completing follow-up, and analysed            | n/a   |
|                          |     | (b) Give reasons for non-participation at each stage                                                                                                                                                         | n/a   |
|                          |     | (c) Consider use of a flow diagram                                                                                                                                                                           | n/a   |
| Descriptive data         | 14* | (a) Give characteristics of study participants (eg demographic, clinical, social) and information on exposures and potential confounders                                                                     | n/a   |
|                          |     | (b) Indicate number of participants with missing data for each variable of interest                                                                                                                          | n/a   |
|                          |     | (c) Summarise follow-up time (eg, average and total amount)                                                                                                                                                  | n/a   |
| Outcome data             | 15* | Report numbers of outcome events or summary measures over time                                                                                                                                               | n/a   |
| Main results             | 16  | (a) Give unadjusted estimates and, if applicable, confounder-adjusted estimates and their precision (eg, 95% confidence interval). Make clear which confounders were adjusted for and why they were included | 9-11  |
|                          |     | (b) Report category boundaries when continuous variables were categorized                                                                                                                                    | n/a   |
|                          |     | (c) If relevant, consider translating estimates of relative risk into absolute risk for a meaningful time period                                                                                             | n/a   |
| Other analyses           | 17  | Report other analyses done—eg analyses of subgroups and interactions, and sensitivity analyses                                                                                                               | 10    |
| <b>Discussion</b>        |     |                                                                                                                                                                                                              |       |
| Key results              | 18  | Summarise key results with reference to study objectives                                                                                                                                                     | 11-12 |
| <b>Limitations</b>       |     |                                                                                                                                                                                                              |       |
| Interpretation           | 20  | Give a cautious overall interpretation of results considering objectives, limitations, multiplicity of analyses, results from similar studies, and other relevant evidence                                   | 12-14 |
| Generalisability         | 21  | Discuss the generalisability (external validity) of the study results                                                                                                                                        | 14    |
| <b>Other information</b> |     |                                                                                                                                                                                                              |       |
| Funding                  | 22  | Give the source of funding and the role of the funders for the present study and, if applicable, for the original study on which the present article is based                                                | 17    |

\*Give information separately for cases and controls in case-control studies and, if applicable, for exposed and unexposed groups in cohort and cross-sectional studies.

**Note:** An Explanation and Elaboration article discusses each checklist item and gives methodological background and published examples of transparent reporting. The STROBE checklist is best used in conjunction with this article (freely available on the Web sites of PLoS Medicine at <http://www.plosmedicine.org/>, Annals of Internal Medicine at <http://www.annals.org/>, and Epidemiology at <http://www.epidem.com/>). Information on the STROBE Initiative is available at [www.strobe-statement.org](http://www.strobe-statement.org).
