# Supplementary material for: A two-part model to estimate inpatient, outpatient, prescribing and care home costs associated with atrial fibrillation in Scotland
Source: PubMed Central journal article supplement (PMC7150597; doi:10.1136/bmjopen-2018-028575), 2020-03-18
Supplement: bmjopen-2018-028575supp001.pdf [file bmjopen-2018-028575supp001.pdf]

## ONLINE SUPPLEMENT

**Equation I. Probability of healthcare utilisation**

$$\Pr(HCE_{it} > 0) = \alpha + \beta_1 \sum_{s=2}^{10} A_{it} + \beta_2 G_i + \beta_3 Y_i + \beta_4 \sum_{s=2}^5 S_i + \beta_5 \sum_{u=2}^8 U_i + \beta_6 \sum_{h=2}^{14} H_i$$

$$+ \beta_7 \sum_{c=2}^3 C_{it} + \beta_8 D_i + \left( \beta_9 \sum_{s=2}^5 S_i * D_i \right) + \left( \beta_{10} \sum_{c=2}^3 C_{it} * \sum_{s=2}^{10} A_{it} \right) + u_i$$

Where: A is age at the time of admission (reference category: 0-49 age group); G is sex (reference category: male); Y year of admission; S is SIMD quintile (reference category: most deprived quintile (1)); U is the urban/rural classification (reference category: large urban area); H is health board of inpatient admission (reference category: Greater Glasgow & Clyde); C is the Charlson comorbidity index (reference category: no comorbidities); D is mortality during five year follow-up;  $u_i$  is the error term for patient  $i$  at time  $t$ .

**Equation II. Cost estimation**

$$E[HCE] = g(x\beta)$$

Where  $x\beta$  is the linear predictor for HCE

**Equation III. Multiplying first and second part**

$$E[HCE|X] = \Pr(HCE > 0|X) * E[HCE|HCE > 0, X]$$

**Table I. Regression interactions: probability of healthcare resources utilisation and cost estimation**

| Covariates                                                            | Probability<br>(1 <sup>st</sup> modelling part) |          | Probability<br>(2 <sup>nd</sup> modelling part) |          |
|-----------------------------------------------------------------------|-------------------------------------------------|----------|-------------------------------------------------|----------|
|                                                                       | Coefficient (95%CI)                             | Std. Err | Coefficient (95%CI)                             | Std. Err |
| <b>Interaction: SIMD - Mortality within 5 years</b>                   |                                                 |          |                                                 |          |
| 1                                                                     | Reference                                       |          |                                                 |          |
| 2                                                                     | -0.015 (-0.069, 0.038)                          | 0.027    | 0.056 (0.027, 0.086)                            | 0.015    |
| 3                                                                     | 0.046 (-0.007, 0.100)                           | 0.027    | 0.067 (0.036, 0.097)                            | 0.016    |
| 4                                                                     | 0.017 (-0.037, 0.071)                           | 0.028    | 0.089 (0.059, 0.120)                            | 0.016    |
| 5                                                                     | 0.069 (0.013, 0.125)                            | 0.029    | 0.100 (0.069, 0.132)                            | 0.016    |
| <b>Interaction: age (year) - Charlson score (1 comorbidity)</b>       |                                                 |          |                                                 |          |
| 0-49                                                                  | Reference                                       |          |                                                 |          |
| 50-54                                                                 | -0.195 (-0.342, -0.049)                         | 0.075    | -0.016 (-0.124, 0.092)                          | 0.055    |
| 55-59                                                                 | -0.384 (-0.514, -0.255)                         | 0.066    | -0.081 (-0.173, 0.012)                          | 0.047    |
| 60-64                                                                 | -0.459 (-0.579, -0.340)                         | 0.061    | -0.116 (-0.202, -0.031)                         | 0.044    |
| 65-69                                                                 | -0.500 (-0.613, -0.386)                         | 0.058    | -0.161 (-0.244, -0.078)                         | 0.042    |
| 70-74                                                                 | -0.510 (-0.621, -0.399)                         | 0.057    | -0.202 (-0.283, -0.121)                         | 0.041    |
| 75-79                                                                 | -0.570 (-0.680, -0.461)                         | 0.056    | -0.197 (-0.276, -0.117)                         | 0.041    |
| 80-84                                                                 | -0.594 (-0.704, -0.484)                         | 0.056    | -0.209 (-0.290, -0.128)                         | 0.041    |
| 85-89                                                                 | -0.643 (-0.756, -0.531)                         | 0.058    | -0.215 (-0.298, -0.132)                         | 0.042    |
| 90-max                                                                | -0.709 (-0.828, -0.590)                         | 0.061    | -0.267 (-0.357, -0.178)                         | 0.045    |
| <b>Interaction: age (year) - Charlson score (&gt;1 comorbidities)</b> |                                                 |          |                                                 |          |
| 0-49                                                                  | Reference                                       |          |                                                 |          |
| 50-54                                                                 | -0.449 (-0.685, -0.213)                         | 0.121    | -0.214 (-0.316, -0.111)                         | 0.052    |
| 55-59                                                                 | -0.539 (-0.751, -0.327)                         | 0.108    | -0.209 (-0.305, -0.112)                         | 0.049    |
| 60-64                                                                 | -0.534 (-0.734, -0.334)                         | 0.102    | -0.323 (-0.412, -0.234)                         | 0.045    |
| 65-69                                                                 | -0.573 (-0.767, -0.378)                         | 0.099    | -0.436 (-0.523, -0.350)                         | 0.044    |
| 70-74                                                                 | -0.650 (-0.842, -0.459)                         | 0.098    | -0.520 (-0.604, -0.436)                         | 0.043    |
| 75-79                                                                 | -0.767 (-0.957, -0.577)                         | 0.097    | -0.556 (-0.639, -0.473)                         | 0.042    |
| 80-84                                                                 | -0.857 (-1.047, -0.667)                         | 0.097    | -0.625 (-0.709, -0.541)                         | 0.043    |
| 85-89                                                                 | -0.967 (-1.159, -0.775)                         | 0.098    | -0.661 (-0.747, -0.576)                         | 0.044    |
| 90-max                                                                | -1.074 (-1.270, -0.878)                         | 0.100    | -0.805 (-0.896, -0.714)                         | 0.046    |

**Equation IV. Probability of healthcare utilisation (alive at the end of the five-year follow-up period)**

$$\Pr(HCE_{it} > 0) = \alpha + \beta_1 \sum_{s=2}^{10} A_{it} + \beta_2 G_i + \beta_3 Y_i + \beta_4 \sum_{s=2}^5 S_i + \beta_5 \sum_{u=2}^8 U_i + \beta_6 \sum_{h=2}^{14} H_i + \beta_7 \sum_{c=2}^3 C_{it} + \left( \beta_8 \sum_{c=2}^3 C_{it} * \sum_{s=2}^{10} A_{it} \right) + u_i$$

Where: A is age at the time of admission (reference category: 0 -49 age group); G is sex (reference category: male); Y year of admission; S is SIMD quintile (reference category: most deprived quintile (1)); U is the urban/rural classification (reference category: large urban area); H is health board of inpatient admission (reference category: Greater Glasgow & Clyde); C is the Charlson comorbidity index (reference category: no comorbidities);  $u_i$  is the error term for patient  $i$  at time  $t$ .

**Table II. Regression interactions: probability of healthcare resources utilisation and cost estimation**  
(alive at the end of the five-year follow-up period)

| Covariates                                                            | Probability<br>(1 <sup>st</sup> modelling part) |          | Probability<br>(2 <sup>nd</sup> modelling part) |          |
|-----------------------------------------------------------------------|-------------------------------------------------|----------|-------------------------------------------------|----------|
|                                                                       | Coefficient (95%CI)                             | Std. Err | Coefficient (95%CI)                             | Std. Err |
| <b>Interaction: age (year) - Charlson score (1 comorbidity)</b>       |                                                 |          |                                                 |          |
| 0-49                                                                  | Reference                                       |          |                                                 |          |
| 50-54                                                                 | -0.190 (-0.341, -0.039)                         | 0.077    | -0.015 (-0.126, 0.097)                          | 0.057    |
| 55-59                                                                 | -0.400 (-0.534, -0.266)                         | 0.069    | -0.087 (-0.187, 0.014)                          | 0.051    |
| 60-64                                                                 | -0.484 (-0.608, -0.360)                         | 0.063    | -0.116 (-0.208, -0.023)                         | 0.047    |
| 65-69                                                                 | -0.531 (-0.649, -0.412)                         | 0.060    | -0.143 (-0.233, -0.053)                         | 0.046    |
| 70-74                                                                 | -0.559 (-0.674, -0.443)                         | 0.059    | -0.195 (-0.283, -0.107)                         | 0.045    |
| 75-79                                                                 | -0.635 (-0.750, -0.521)                         | 0.058    | -0.207 (-0.293, -0.121)                         | 0.044    |
| 80-84                                                                 | -0.680 (-0.796, -0.565)                         | 0.059    | -0.215 (-0.304, -0.125)                         | 0.046    |
| 85-89                                                                 | -0.730 (-0.850, -0.610)                         | 0.061    | -0.254 (-0.349, -0.159)                         | 0.048    |
| 90-max                                                                | -0.827 (-0.959, -0.695)                         | 0.067    | -0.281 (-0.393, -0.169)                         | 0.057    |
| <b>Interaction: age (year) - Charlson score (&gt;1 comorbidities)</b> |                                                 |          |                                                 |          |
| 0-49                                                                  | Reference                                       |          |                                                 |          |
| 50-54                                                                 | -0.408 (-0.658, -0.158)                         | 0.127    | -0.226 (-0.342, -0.109)                         | 0.059    |
| 55-59                                                                 | -0.504 (-0.726, -0.281)                         | 0.114    | -0.235 (-0.348, -0.122)                         | 0.058    |
| 60-64                                                                 | -0.525 (-0.735, -0.316)                         | 0.107    | -0.339 (-0.443, -0.236)                         | 0.053    |
| 65-69                                                                 | -0.580 (-0.784, -0.377)                         | 0.104    | -0.448 (-0.549, -0.347)                         | 0.051    |
| 70-74                                                                 | -0.713 (-0.913, -0.513)                         | 0.102    | -0.565 (-0.663, -0.467)                         | 0.050    |
| 75-79                                                                 | -0.820 (-1.019, -0.621)                         | 0.101    | -0.648 (-0.745, -0.552)                         | 0.049    |
| 80-84                                                                 | -0.938 (-1.137, -0.739)                         | 0.102    | -0.702 (-0.801, -0.603)                         | 0.051    |
| 85-89                                                                 | -1.074 (-1.276, -0.872)                         | 0.103    | -0.769 (-0.873, -0.665)                         | 0.053    |
| 90-max                                                                | -1.196 (-1.406, -0.986)                         | 0.107    | -0.932 (-1.051, -0.814)                         | 0.060    |

**Figure I. Average annual costs per patient hospitalised with AF by sector. Cost components with confidence interval are presented for each age group (alive at the end of the five-year follow-up period)**

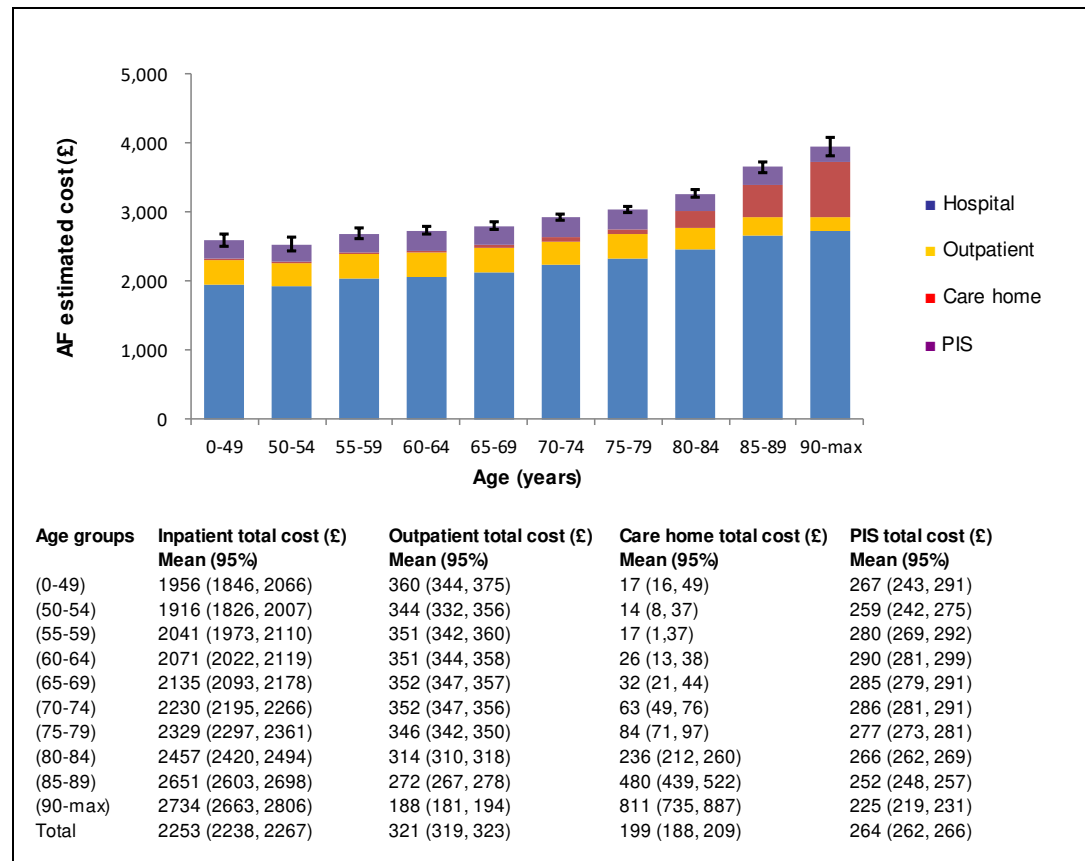

**Equation V. Probability of healthcare utilisation (dead at the end of the five-year follow-up period)**

$$\Pr(HCE_{it} > 0) = \alpha + \beta_1 \sum_{s=2}^{10} A_{it} + \beta_2 G_i + \beta_3 Y_i + \beta_4 \sum_{s=2}^5 S_i + \beta_5 \sum_{u=2}^8 U_i + \beta_6 \sum_{h=2}^{14} H_i + \beta_7 \sum_{c=2}^3 C_{it} + \left( \beta_8 \sum_{c=2}^3 C_{it} * \sum_{s=2}^{10} A_{it} \right)$$

Where: A is age at the time of admission (reference category: 0 -49 age group); G is sex (reference category: male); Y year of admission; S is SIMD quintile (reference category: most deprived quintile (1)); U is the urban/rural classification (reference category: large urban area); H is health board of inpatient admission (reference category: Greater Glasgow & Clyde); C is the Charlson comorbidity index (reference category: no comorbidities);  $u_i$  is the error term for patient  $i$  at time  $t$ .

Note: the model for care home does not include the 0 -49 and 50-54 age groups, as none of those patients incurred any cost related to care home.

**Table III. Regression interactions: probability of healthcare resources utilisation and cost estimation (dead at the end of the five-year follow-up period)**

| Covariates                                                            | Probability<br>(1 <sup>st</sup> modelling part) |          | Probability<br>(2 <sup>nd</sup> modelling part) |          |
|-----------------------------------------------------------------------|-------------------------------------------------|----------|-------------------------------------------------|----------|
|                                                                       | Coefficient (95%CI)                             | Std. Err | Coefficient (95%CI)                             | Std. Err |
| <b>Interaction: age (year) - Charlson score (1 comorbidity)</b>       |                                                 |          |                                                 |          |
| 0-49                                                                  | Reference                                       |          |                                                 |          |
| 50-54                                                                 | -0.057 (-0.456, 0.343)                          | 0.204    | 0.124 (-0.268, 0.515)                           | 0.200    |
| 55-59                                                                 | 0.130 (-0.207, 0.468)                           | 0.172    | 0.054 (-0.282, 0.389)                           | 0.171    |
| 60-64                                                                 | 0.083 (-0.223, 0.389)                           | 0.156    | -0.009 (-0.309, 0.291)                          | 0.153    |
| 65-69                                                                 | 0.028 (-0.263, 0.320)                           | 0.149    | -0.054 (-0.342, 0.234)                          | 0.147    |
| 70-74                                                                 | -0.006 (-0.290, 0.278)                          | 0.145    | -0.051 (-0.334, 0.232)                          | 0.144    |
| 75-79                                                                 | -0.078 (-0.358, 0.201)                          | 0.143    | 0.002 (-0.278, 0.282)                           | 0.143    |
| 80-84                                                                 | -0.200 (-0.478, 0.078)                          | 0.142    | -0.048 (-0.326, 0.230)                          | 0.142    |
| 85-89                                                                 | -0.160 (-0.437, 0.117)                          | 0.141    | -0.039 (-0.316, 0.239)                          | 0.142    |
| 90-max                                                                | -0.154 (-0.431, 0.123)                          | 0.141    | -0.079 (-0.358, 0.200)                          | 0.142    |
| <b>Interaction: age (year) - Charlson score (&gt;1 comorbidities)</b> |                                                 |          |                                                 |          |
| 0-49                                                                  | Reference                                       |          |                                                 |          |
| 50-54                                                                 | 0.000 (-0.340, 0.339)                           | 0.173    | 0.066 (-0.268, 0.400)                           | 0.170    |
| 55-59                                                                 | -0.147 (-0.436, 0.142)                          | 0.147    | 0.041 (-0.240, 0.322)                           | 0.143    |
| 60-64                                                                 | -0.135 (-0.398, 0.128)                          | 0.134    | -0.114 (-0.360, 0.132)                          | 0.126    |
| 65-69                                                                 | -0.215 (-0.466, 0.036)                          | 0.128    | -0.164 (-0.401, 0.074)                          | 0.121    |
| 70-74                                                                 | -0.192 (-0.436, 0.053)                          | 0.125    | -0.237 (-0.470, -0.005)                         | 0.119    |
| 75-79                                                                 | -0.311 (-0.553, -0.070)                         | 0.123    | -0.248 (-0.478, -0.018)                         | 0.117    |
| 80-84                                                                 | -0.443 (-0.683, -0.204)                         | 0.122    | -0.367 (-0.595, -0.139)                         | 0.116    |
| 85-89                                                                 | -0.394 (-0.633, -0.154)                         | 0.122    | -0.394 (-0.623, -0.166)                         | 0.116    |
| 90-max                                                                | -0.312 (-0.551, -0.073)                         | 0.122    | -0.483 (-0.713, -0.254)                         | 0.117    |

**Figure II. Average annual costs per patient hospitalised with AF by sector. Cost components with confidence interval are presented for each age group (dead at the end of the five-year follow-up period)**

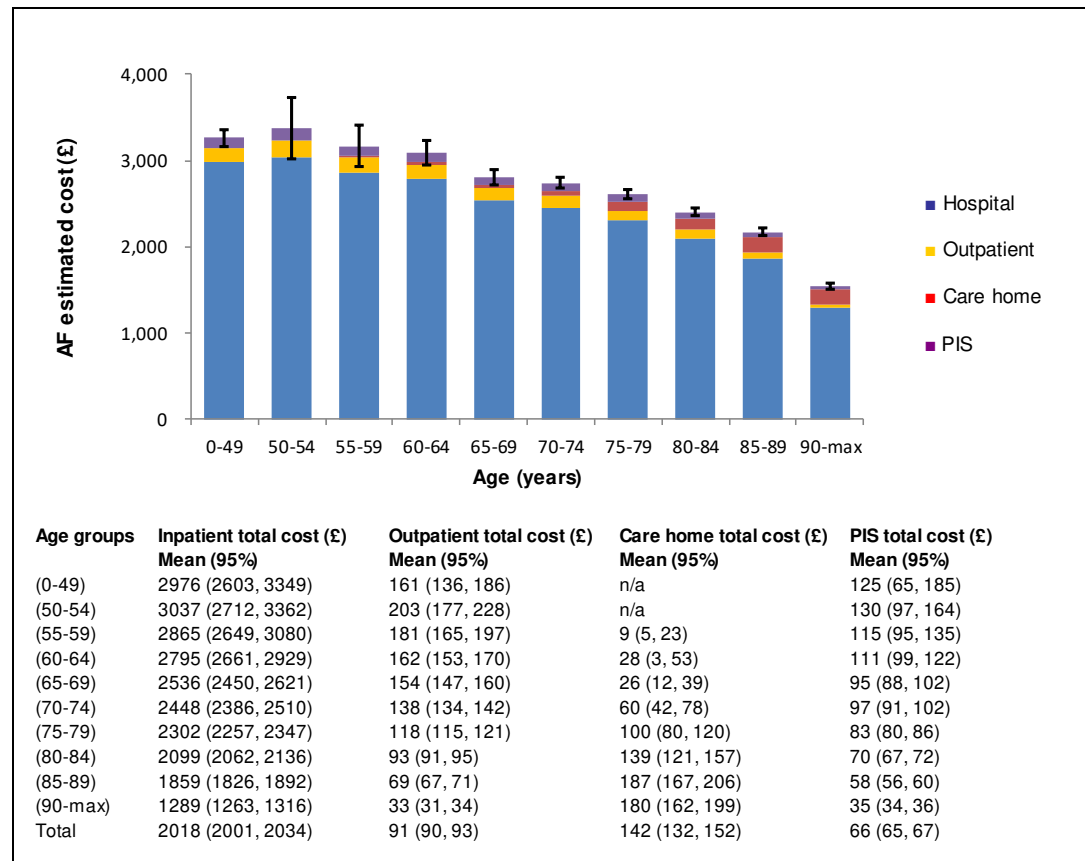

Note: the care home total cost estimation does not include the 0-49 and 50-54 age groups, as none of those patients incurred any cost related to care home.
